# Supplementary material for: Identification of potent biparatopic antibodies targeting FGFR2 fusion–driven cholangiocarcinoma
Source: JCI journal article supplement (doi:10.1172/jci182417), 2025-02-27
Supplement: sd1 [file 1]

# Full unedited gel for Figure 1J

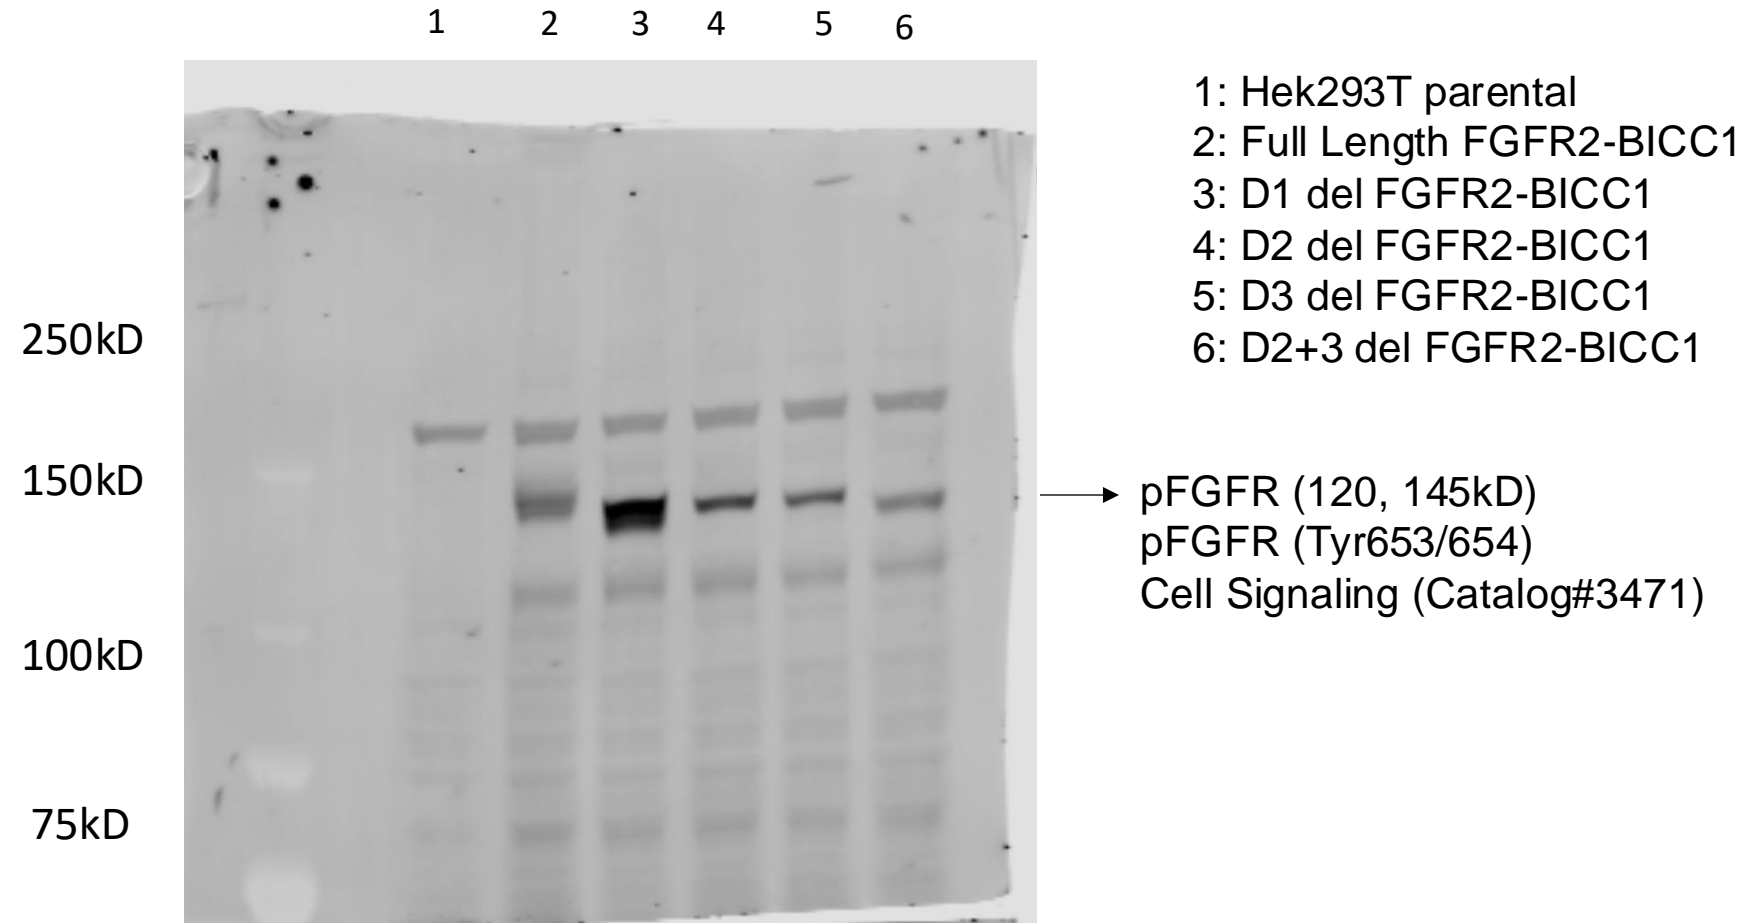

# Full unedited gel for Figure 1J

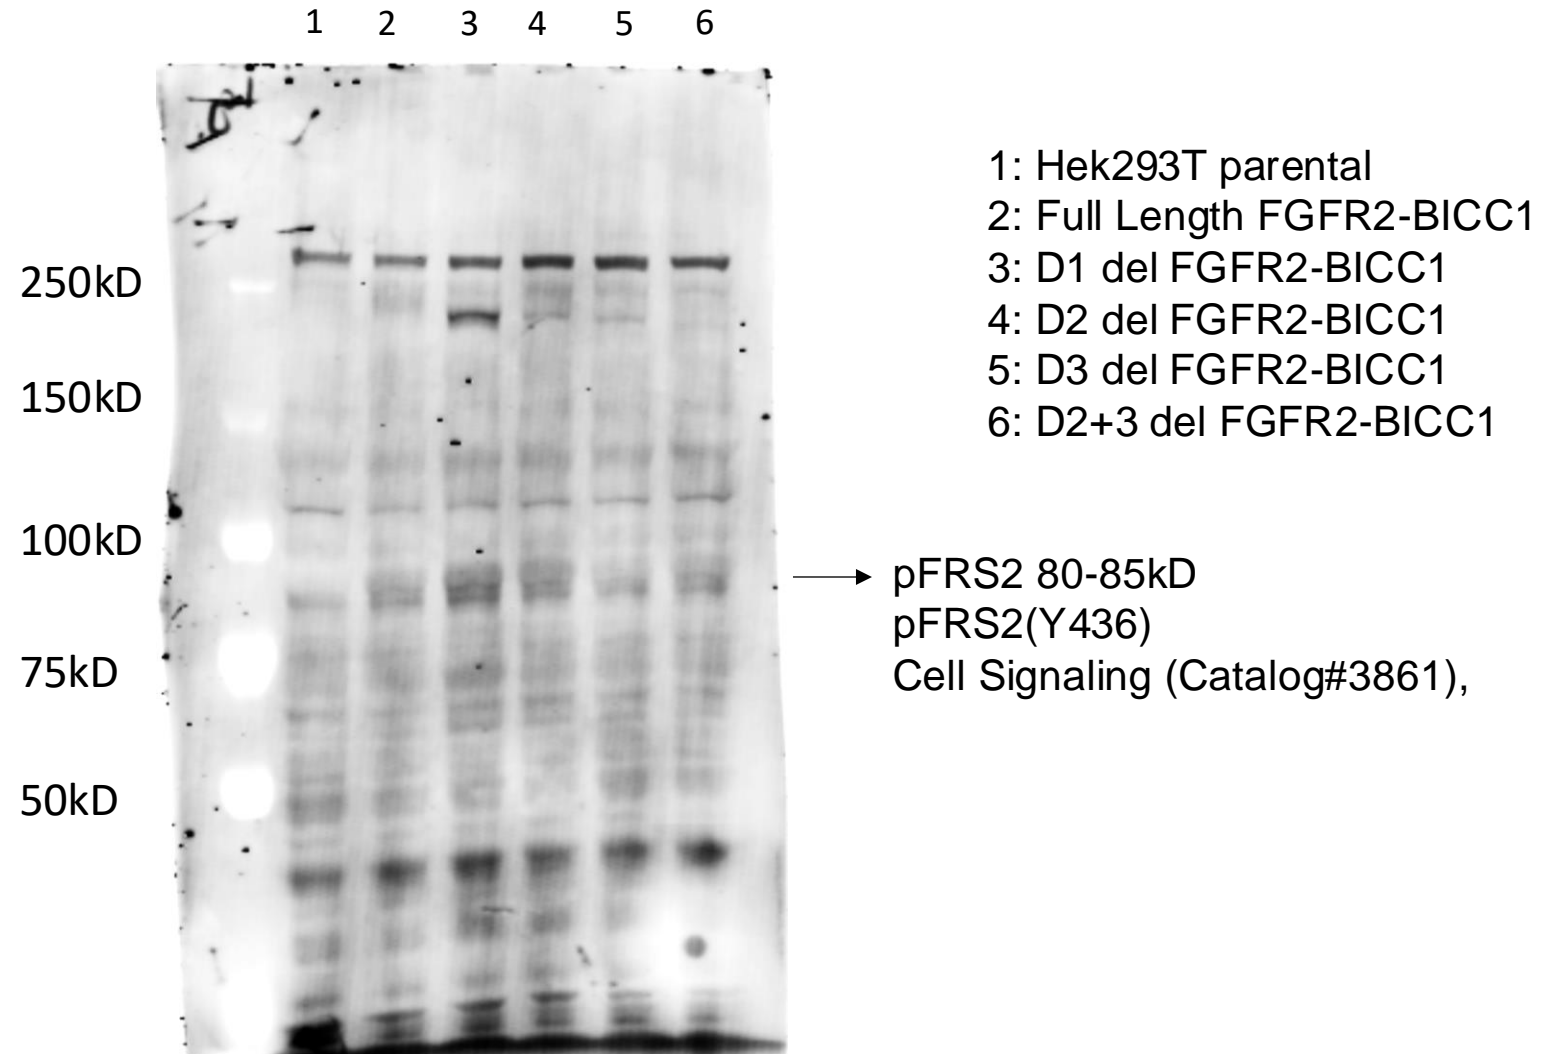

# Full unedited gel for Figure 1J

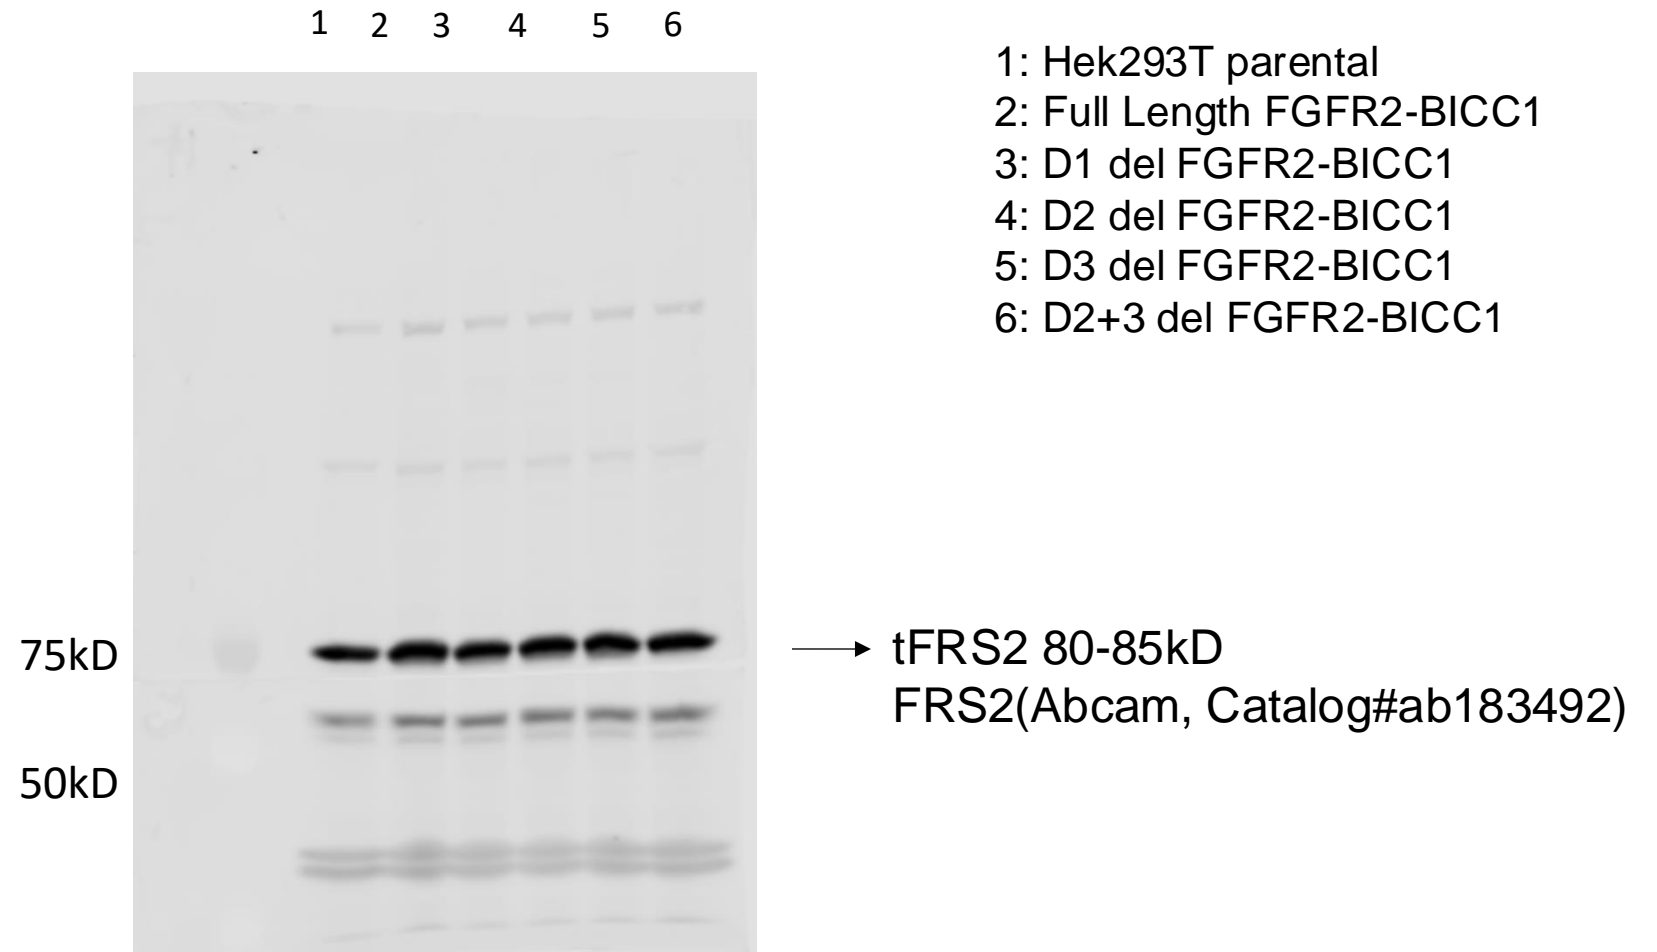

# Full unedited gel for Figure 1J

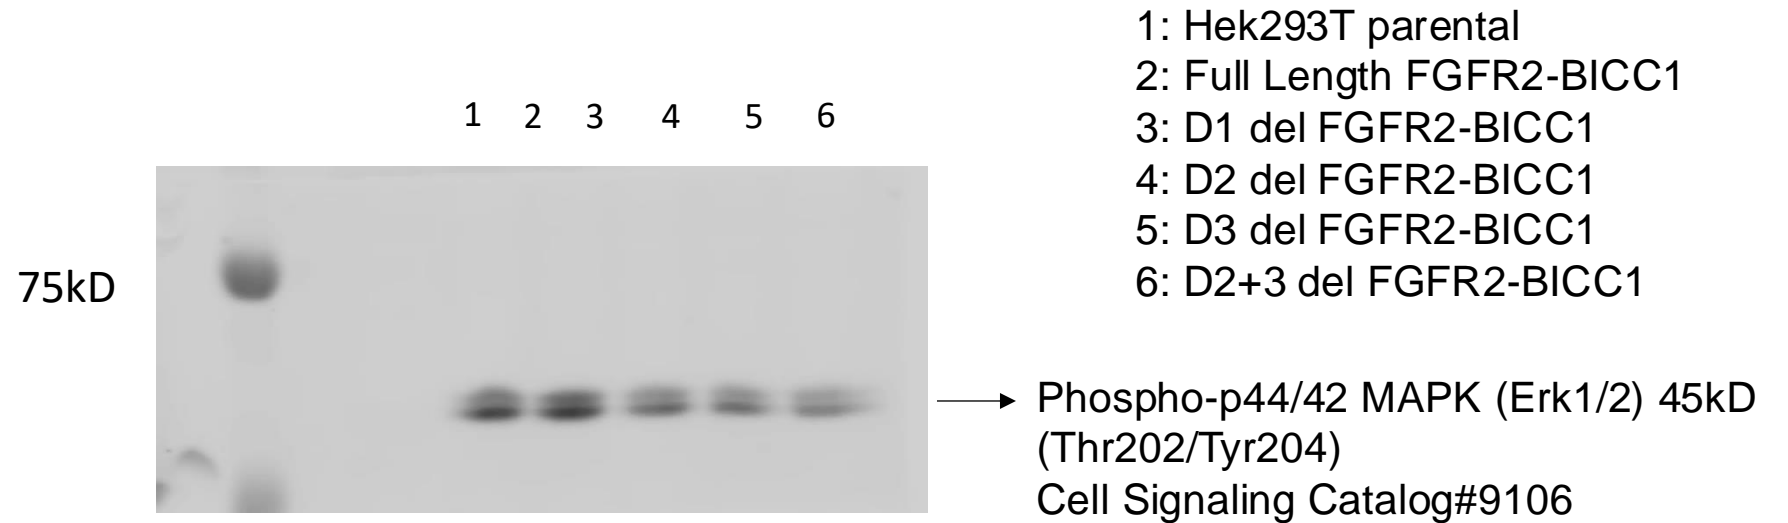

# Full unedited gel for Figure 1J

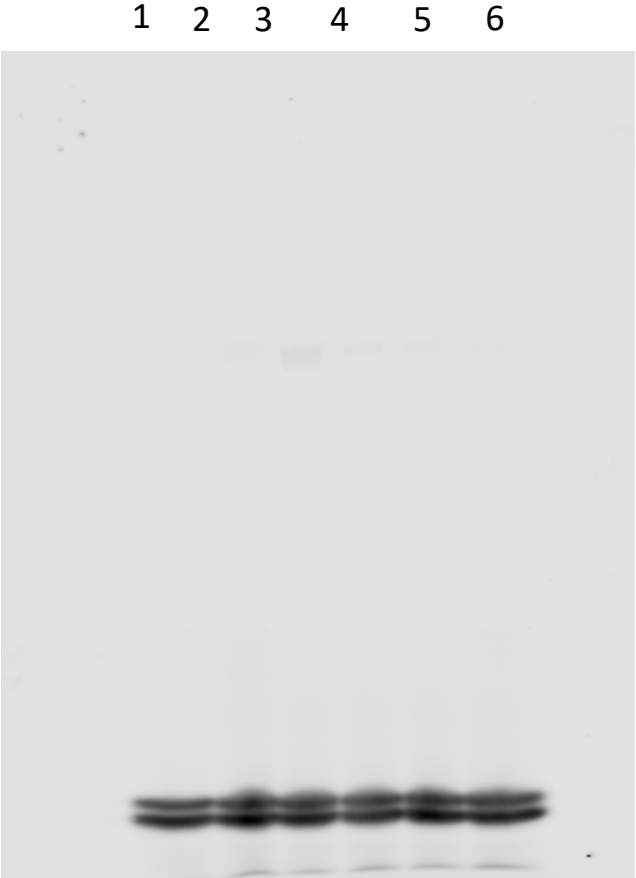

- 1: Hek293T parental
- 2: Full Length FGFR2-BICC1
- 3: D1 del FGFR2-BICC1
- 4: D2 del FGFR2-BICC1
- 5: D3 del FGFR2-BICC1
- 6: D2+3 del FGFR2-BICC1

→ p44/42 MAPK (Erk1/2) 42, 44kD  
Cell Signaling Catalog#4695

# Full unedited gel for Figure 1J

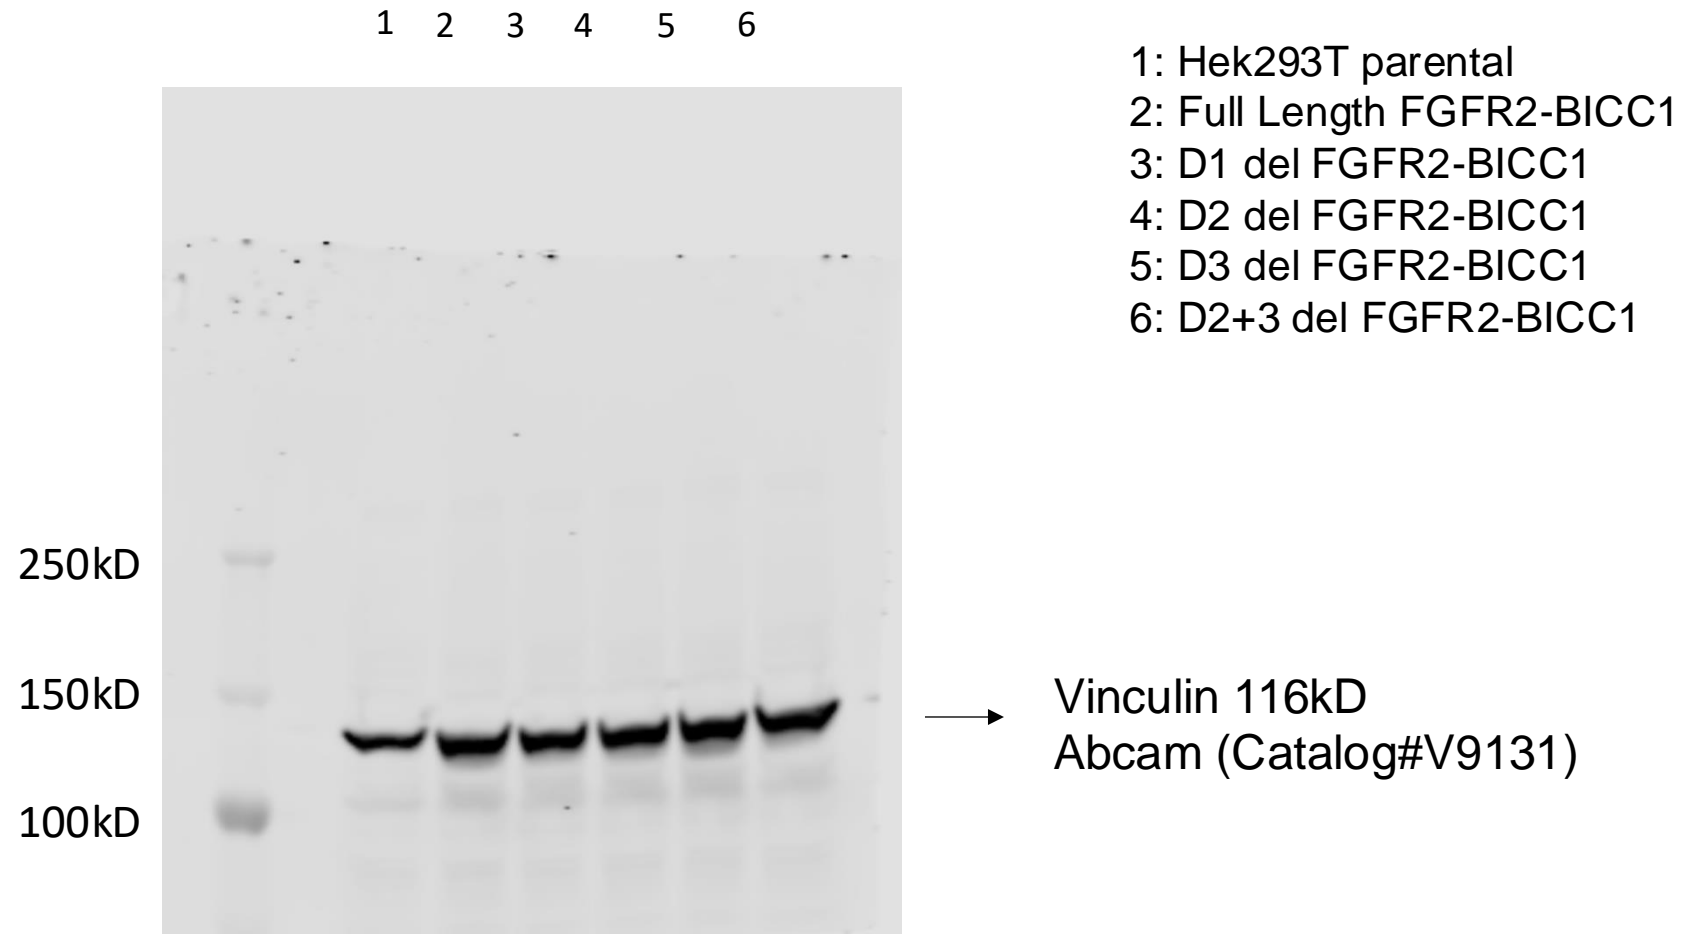

# Full unedited gel for Figure S1B

- 1: NIH3T3 parental
- 2: NIH3T3 parental
- 3: pLenti-CMV-FGFR2-LgBiT expressing 3T3 (DNA:TrasnIT=1:2)
- 4: pLenti-CMV-FGFR2-LgBiT expressing 3T3(DNA:TrasnIT=1:3)
- 5: pLenti-CMV-FGFR2-LgBiT expressing 3T3 (DNA:TrasnIT=1:4)
- 6: pLenti-CMV-FGFR2-ACHYL1-LgBiT expressing 3T3 (DNA:TrasnIT=1:2)
- 7: pLenti-CMV-FGFR2-ACHYL1-LgBiT expressing 3T3(DNA:TrasnIT=1:3)
- 8: pLenti-CMV-FGFR2-ACHYL1-LgBiT expressing 3T3 (DNA:TrasnIT=1:4)
- 9: pLenti-CMV-FGFR2-BICC1-LgBiT expressing 3T3 (DNA:TrasnIT=1:2)
- 10: pLenti-CMV-FGFR2-BICC1 expressing 3T3(DNA:TrasnIT=1:3)
- 11: pLenti-CMV-FGFR2-BICC1 expressing 3T3 (DNA:TrasnIT=1:4)

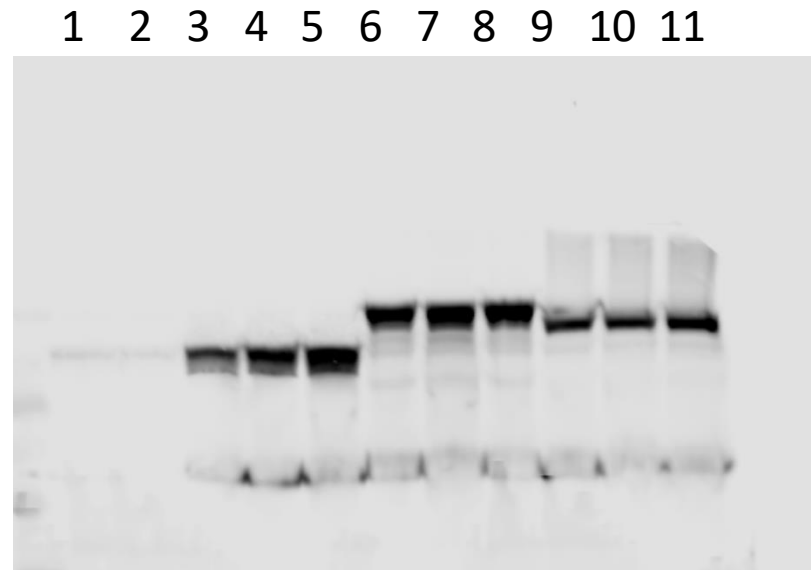

—→ total FGFR2 (~130kD)  
—→ Antibody E

# Full unedited gel for Figure S1B

- 1: NIH3T3 parental
- 2: NIH3T3 parental
- 3: pLenti-CMV-FGFR2-LgBiT expressing 3T3 (DNA:TrasnIT=1:2)
- 4: pLenti-CMV-FGFR2-LgBiT expressing 3T3(DNA:TrasnIT=1:3)
- 5: pLenti-CMV-FGFR2-LgBiT expressing 3T3 (DNA:TrasnIT=1:4)
- 6: pLenti-CMV-FGFR2-ACHYL1-LgBiT expressing 3T3 (DNA:TrasnIT=1:2)
- 7: pLenti-CMV-FGFR2-ACHYL1-LgBiT expressing 3T3(DNA:TrasnIT=1:3)
- 8: pLenti-CMV-FGFR2-ACHYL1-LgBiT expressing 3T3 (DNA:TrasnIT=1:4)
- 9: pLenti-CMV-FGFR2-BICC1-LgBiT expressing 3T3 (DNA:TrasnIT=1:2)
- 10: pLenti-CMV-FGFR2-BICC1 expressing 3T3(DNA:TrasnIT=1:3)
- 11: pLenti-CMV-FGFR2-BICC1 expressing 3T3 (DNA:TrasnIT=1:4)

0 1 2 3 4 5 6 7 8 9 10 11

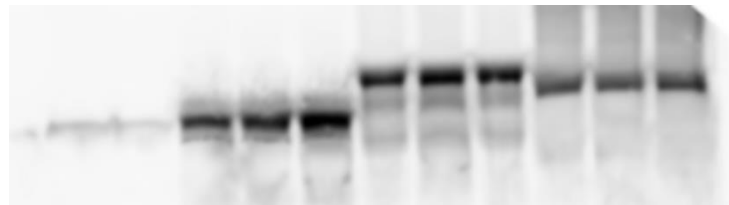

→ anti-nluc

→ Promega Catalog#N7000



# Full unedited gel for Figure S1B

- 1: NIH3T3 parental
- 2: NIH3T3 parental
- 3: pLenti-CMV-FGFR2-LgBiT expressing 3T3 (DNA:TrasnIT=1:2)
- 4: pLenti-CMV-FGFR2-LgBiT expressing 3T3(DNA:TrasnIT=1:3)
- 5: pLenti-CMV-FGFR2-LgBiT expressing 3T3 (DNA:TrasnIT=1:4)
- 6: pLenti-CMV-FGFR2-ACHYL1-LgBiT expressing 3T3 (DNA:TrasnIT=1:2)
- 7: pLenti-CMV-FGFR2-ACHYL1-LgBiT expressing 3T3(DNA:TrasnIT=1:3)
- 8: pLenti-CMV-FGFR2-ACHYL1-LgBiT expressing 3T3 (DNA:TrasnIT=1:4)
- 9: pLenti-CMV-FGFR2-BICC1-LgBiT expressing 3T3 (DNA:TrasnIT=1:2)
- 10: pLenti-CMV-FGFR2-BICC1 expressing 3T3(DNA:TrasnIT=1:3)
- 11: pLenti-CMV-FGFR2-BICC1 expressing 3T3 (DNA:TrasnIT=1:4)

0 1 2 3 4 5 6 7 8 9 10 11

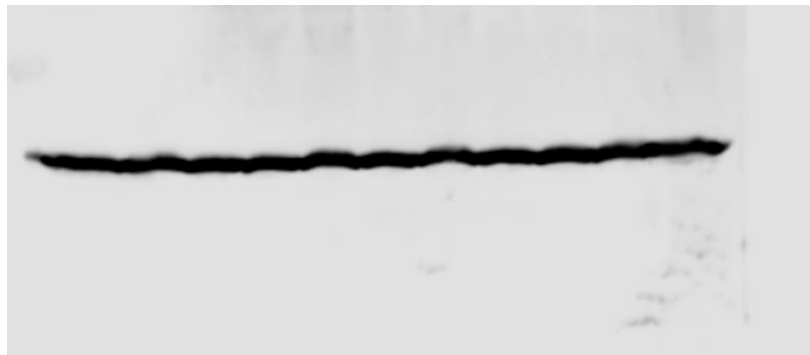

→  $\alpha$ -Tubulin, 52kD  
Cell Signaling Catalog #3873

# Full unedited gel for Figure S1D

- 1: Parental NIH3T3
- 2: NIH3T3: FGFR2-BICC1 FL
- 3: NIH3T3: FGFR2-BICC1 with D1 deletion
- 4: NIH3T3: FGFR2-BICC1 with D2 deletion
- 5: NIH3T3: FGFR2-BICC1 with D3 deletion
- 6: NIH3T3: FGFR2-BICC1 with D2+3 deletion

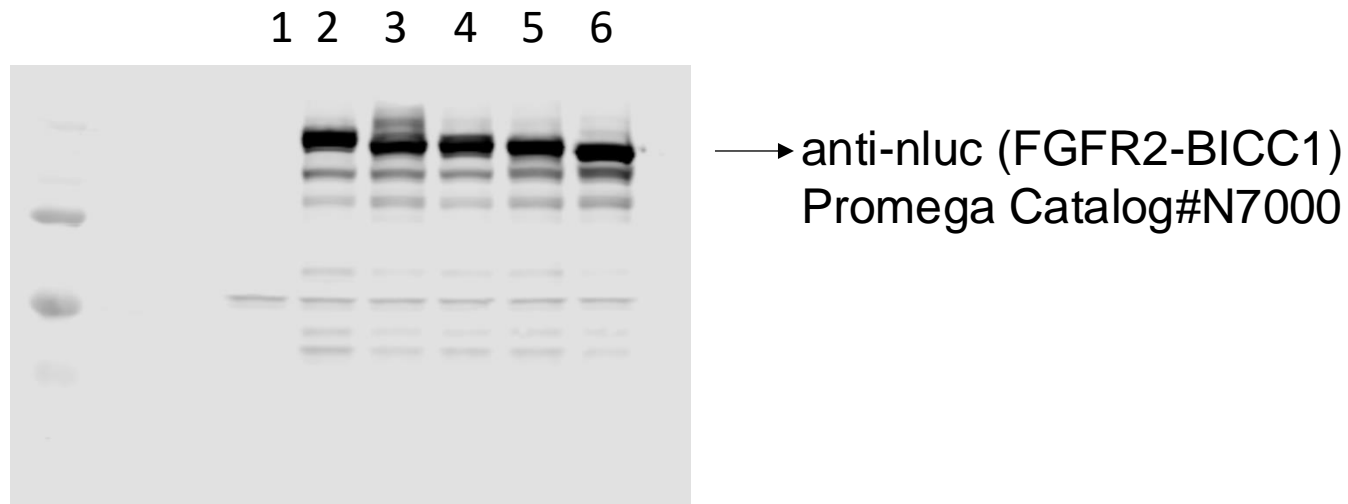

# Full unedited gel for Figure S1D

- 1: Parental NIH3T3
- 2: NIH3T3: FGFR2-BICC1 FL
- 3: NIH3T3: FGFR2-BICC1 with D1 deletion
- 4: NIH3T3: FGFR2-BICC1 with D2 deletion
- 5: NIH3T3: FGFR2-BICC1 with D3 deletion
- 6: NIH3T3: FGFR2-BICC1 with D2+3 deletion

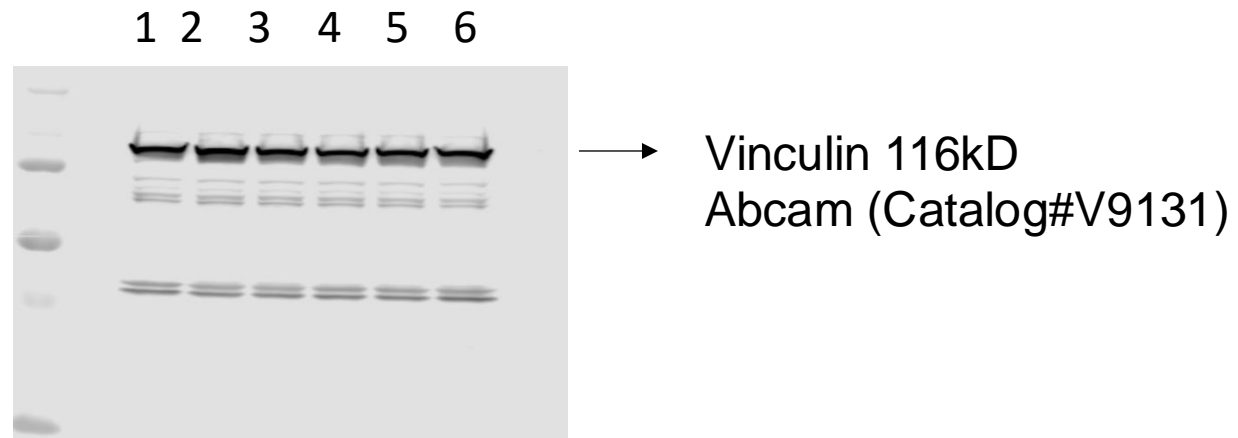

# Full unedited gel for Figure 4G

- 0: ICC13-7 treated with PBS
- 1: ICC13-7 treated with IgG1 control
- 2: ICC13-7 treated with BpAb B/D
- 3: ICC13-7 treated with BpAb B/C
- 4: ICC13-7 treated with antibody B
- 5: ICC13-7 treated with antibody D
- 6: ICC13-7 treated with antibody C

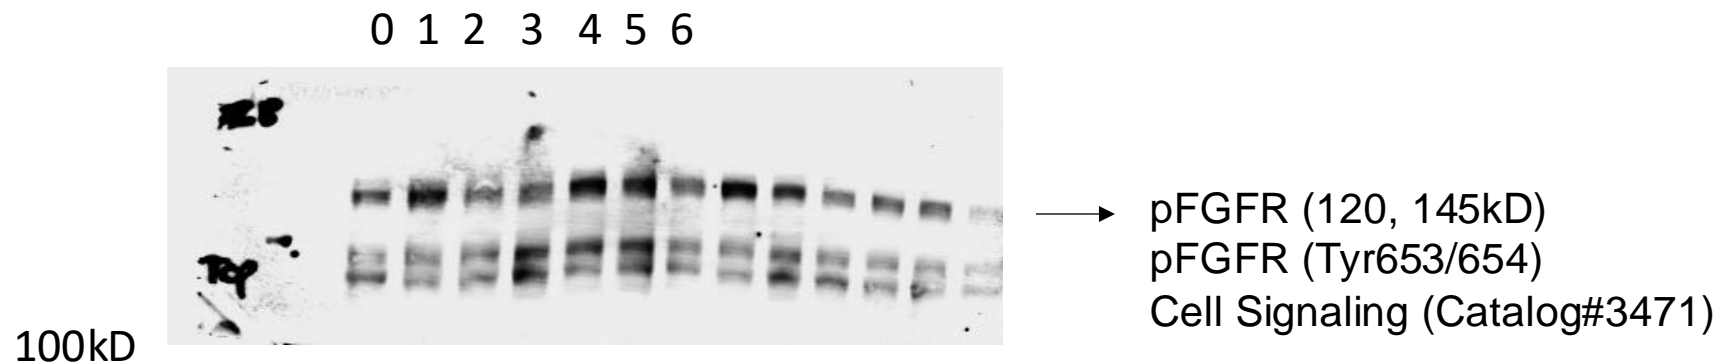

# Full unedited gel for Figure 4G

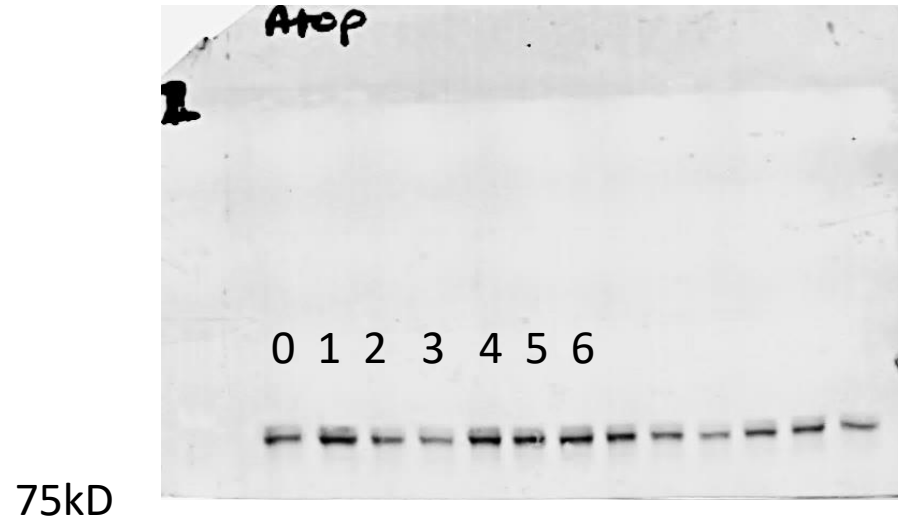

- 0: ICC13-7 treated with PBS
- 1: ICC13-7 treated with IgG1 control
- 2: ICC13-7 treated with BpAb B/D
- 3: ICC13-7 treated with BpAb B/C
- 4: ICC13-7 treated with antibody B
- 5: ICC13-7 treated with antibody D
- 6: ICC13-7 treated with antibody C

→ pFRS2 80-85kD  
pFRS2(Y436)  
Cell Signaling (Catalog#3861),

# Full unedited gel for Figure 4G

- 0: ICC13-7 treated with PBS
- 1: ICC13-7 treated with IgG1 control
- 2: ICC13-7 treated with BpAb B/D
- 3: ICC13-7 treated with BpAb B/C
- 4: ICC13-7 treated with antibody B
- 5: ICC13-7 treated with antibody D
- 6: ICC13-7 treated with antibody C

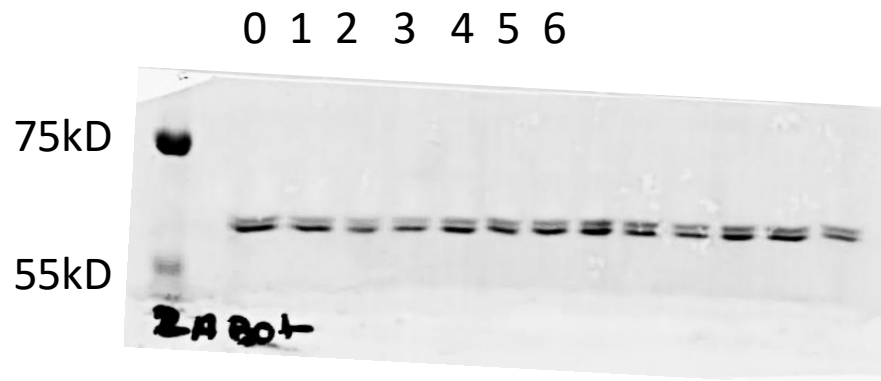

→ Phospho-p44/42 MAPK (Erk1/2) 45kD  
(Thr202/Tyr204)  
Cell Signaling Catalog#9106

# Full unedited gel for Figure 4G

- 0: ICC13-7 treated with PBS
- 1: ICC13-7 treated with IgG1 control
- 2: ICC13-7 treated with BpAb B/D
- 3: ICC13-7 treated with BpAb B/C
- 4: ICC13-7 treated with antibody B
- 5: ICC13-7 treated with antibody D
- 6: ICC13-7 treated with antibody C

0 1 2 3 4 5 6

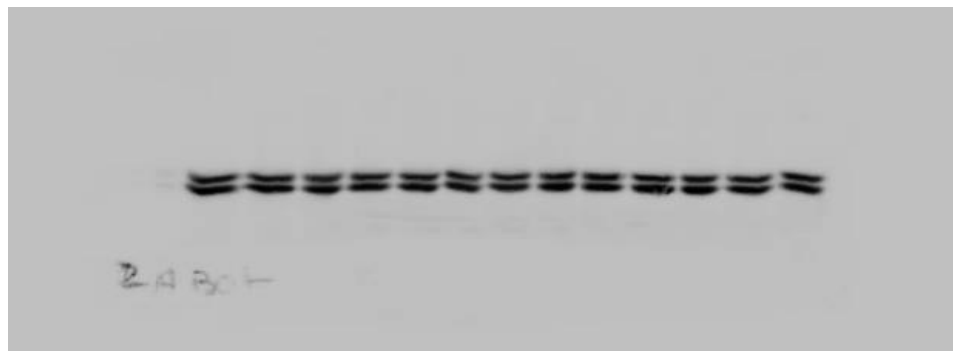

→ p44/42 MAPK (Erk1/2) 42, 44kD  
Cell Signaling Catalog#4695

# Full unedited gel for Figure 4G

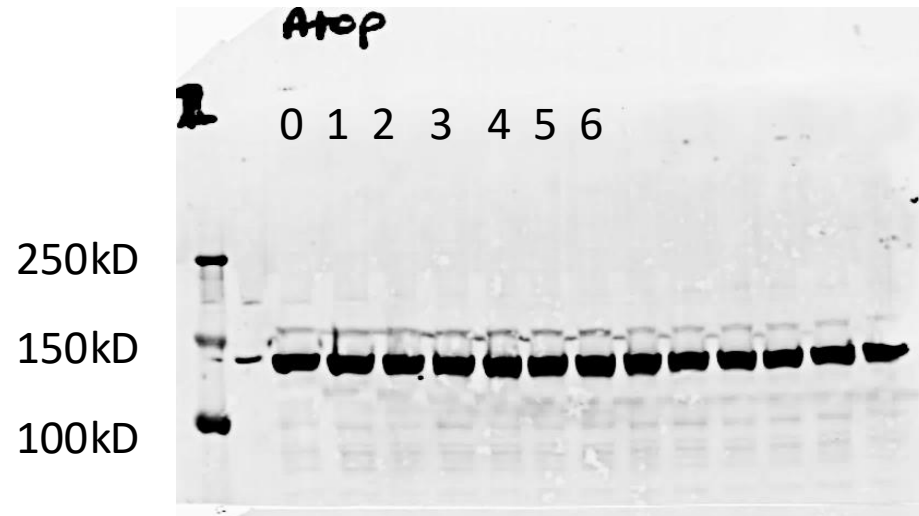

- 0: ICC13-7 treated with PBS
- 1: ICC13-7 treated with IgG1 control
- 2: ICC13-7 treated with BpAb B/D
- 3: ICC13-7 treated with BpAb B/C
- 4: ICC13-7 treated with antibody B
- 5: ICC13-7 treated with antibody D
- 6: ICC13-7 treated with antibody C



# Full unedited gel for Figure 4H

- 1: ICC13-7 treated with IgG1 control
- 2: ICC13-7 treated with IgG1 control + FGF10
- 3: ICC13-7 treated with BpAb B/D + FGF10
- 4: ICC13-7 treated with BpAb B/C + FGF10
- 5: ICC13-7 treated with antibody B + FGF10
- 6: ICC13-7 treated with antibody D + FGF10
- 7: ICC13-7 treated with antibody C + FGF10

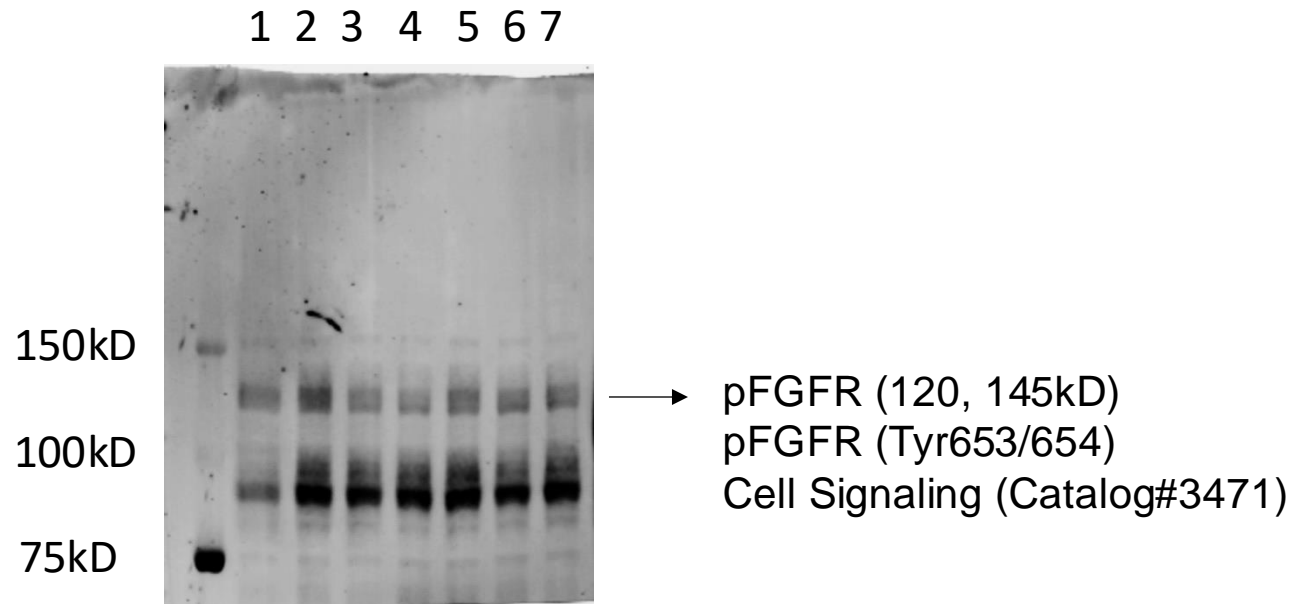

# Full unedited gel for Figure 4H

- 1: ICC13-7 treated with IgG1 control
- 2: ICC13-7 treated with IgG1 control + FGF10
- 3: ICC13-7 treated with BpAb B/D + FGF10
- 4: ICC13-7 treated with BpAb B/C + FGF10
- 5: ICC13-7 treated with antibody B + FGF10
- 6: ICC13-7 treated with antibody D + FGF10
- 7: ICC13-7 treated with antibody C + FGF10

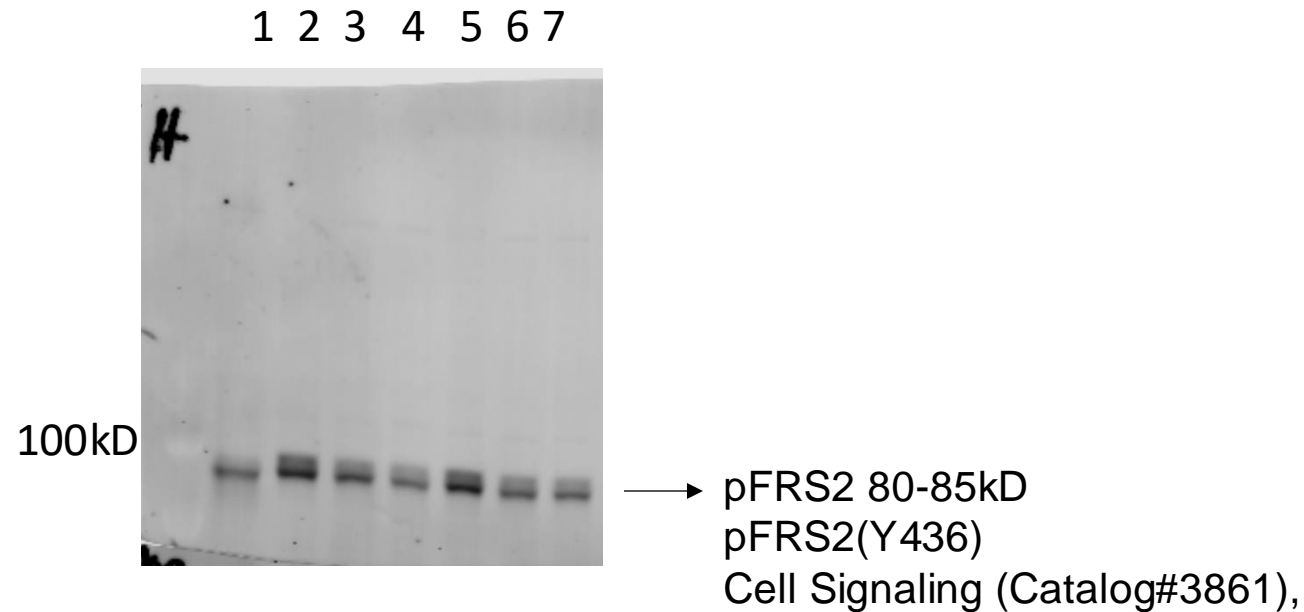

# Full unedited gel for Figure 4H

- 1: ICC13-7 treated with IgG1 control
- 2: ICC13-7 treated with IgG1 control + FGF10
- 3: ICC13-7 treated with BpAb B/D + FGF10
- 4: ICC13-7 treated with BpAb B/C + FGF10
- 5: ICC13-7 treated with antibody B + FGF10
- 6: ICC13-7 treated with antibody D + FGF10
- 7: ICC13-7 treated with antibody C + FGF10

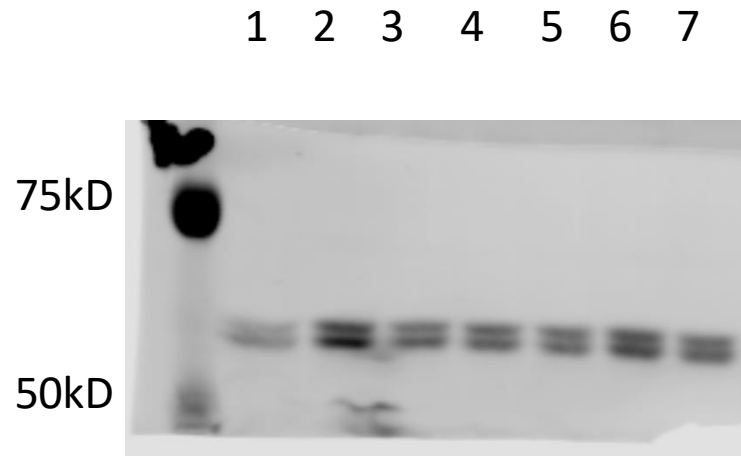

→ Phospho-p44/42 MAPK (Erk1/2) 45kD  
(Thr202/Tyr204)  
Cell Signaling Catalog#9106

# Full unedited gel for Figure 4H

- 1: ICC13-7 treated with IgG1 control
- 2: ICC13-7 treated with IgG1 control + FGF10
- 3: ICC13-7 treated with BpAb B/D + FGF10
- 4: ICC13-7 treated with BpAb B/C + FGF10
- 5: ICC13-7 treated with antibody B + FGF10
- 6: ICC13-7 treated with antibody D + FGF10
- 7: ICC13-7 treated with antibody C + FGF10

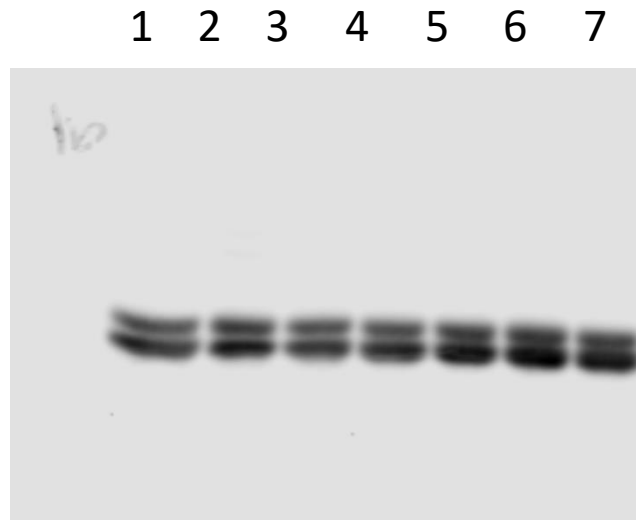

→ p44/42 MAPK (Erk1/2) 42, 44kD  
Cell Signaling Catalog#4695

# Full unedited gel for Figure 4H

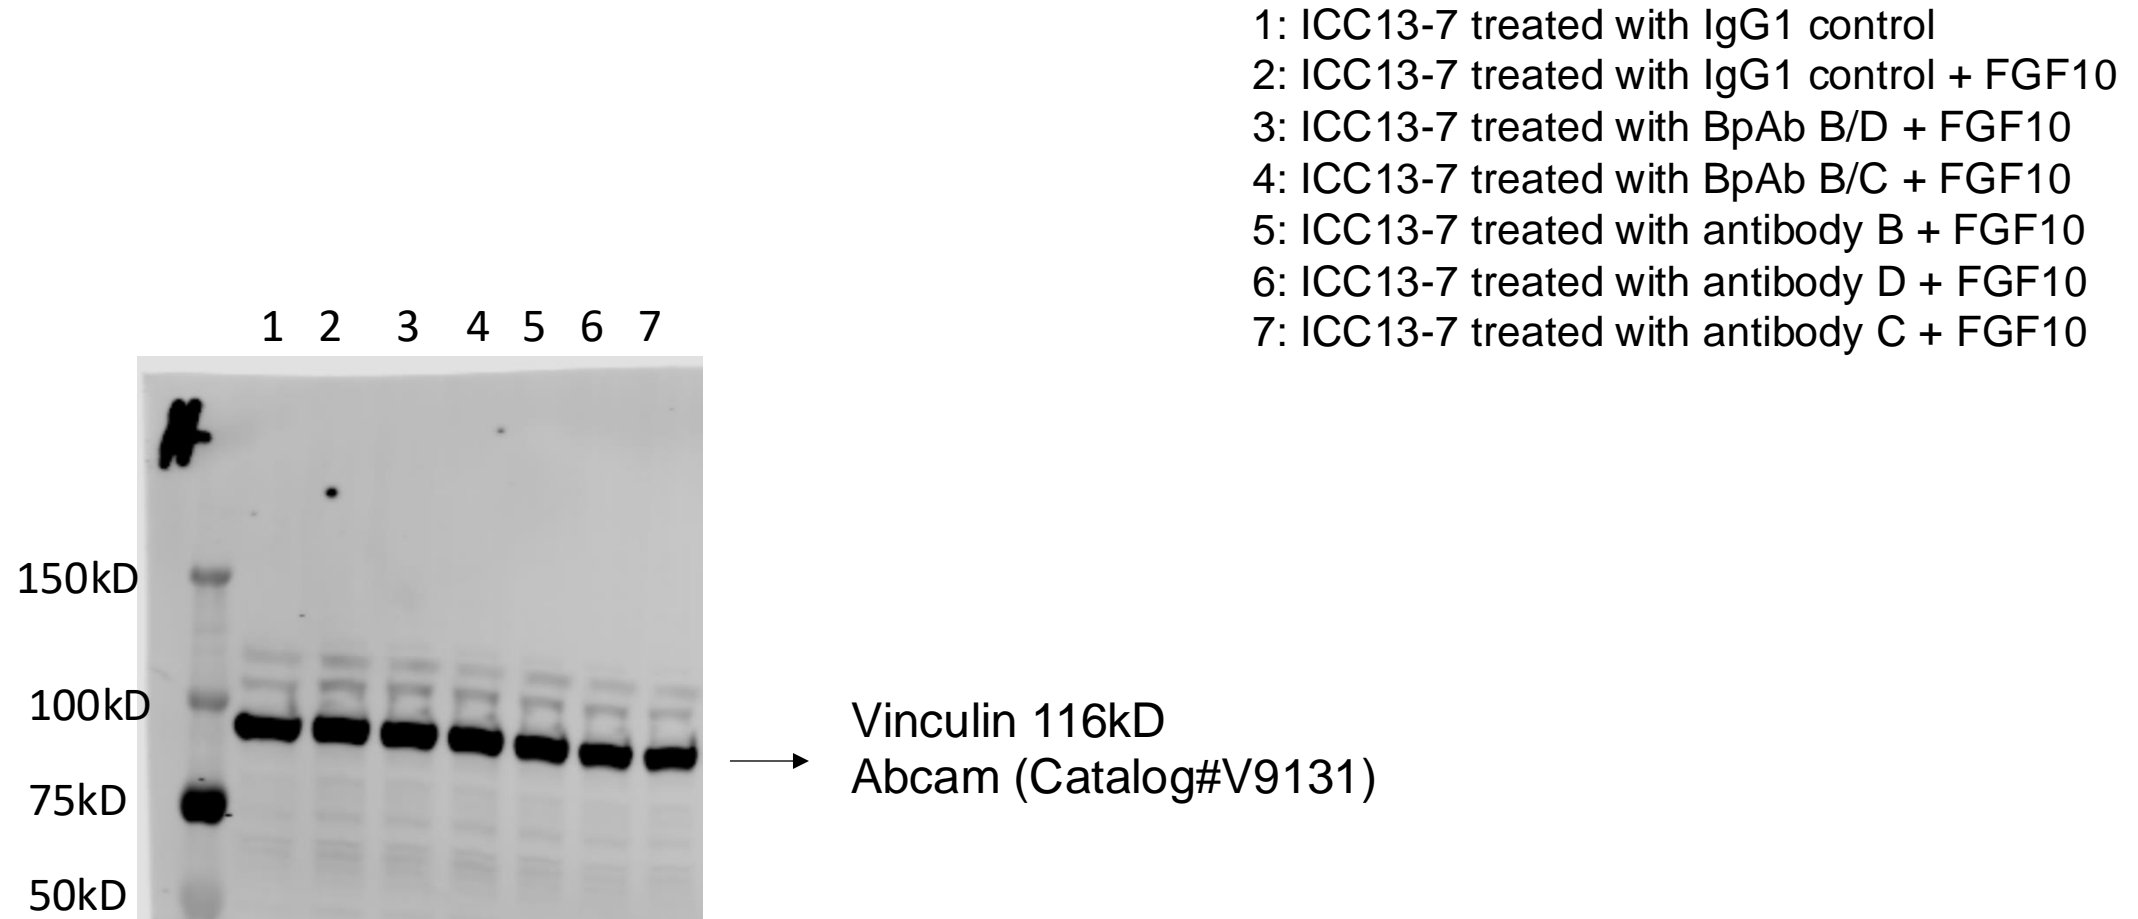

# Full unedited gel for Figure S4A

- 1: ICC21 treated with IgG1 control
- 2: ICC21 treated with BpAb B/C
- 3: ICC21 treated with BpAb B/D
- 4: ICC21 treated with IgG1 control +FGF10
- 5: ICC21 treated with BpAb B/C + FGF10
- 6: ICC21 treated with BpAb B/D + FGF10

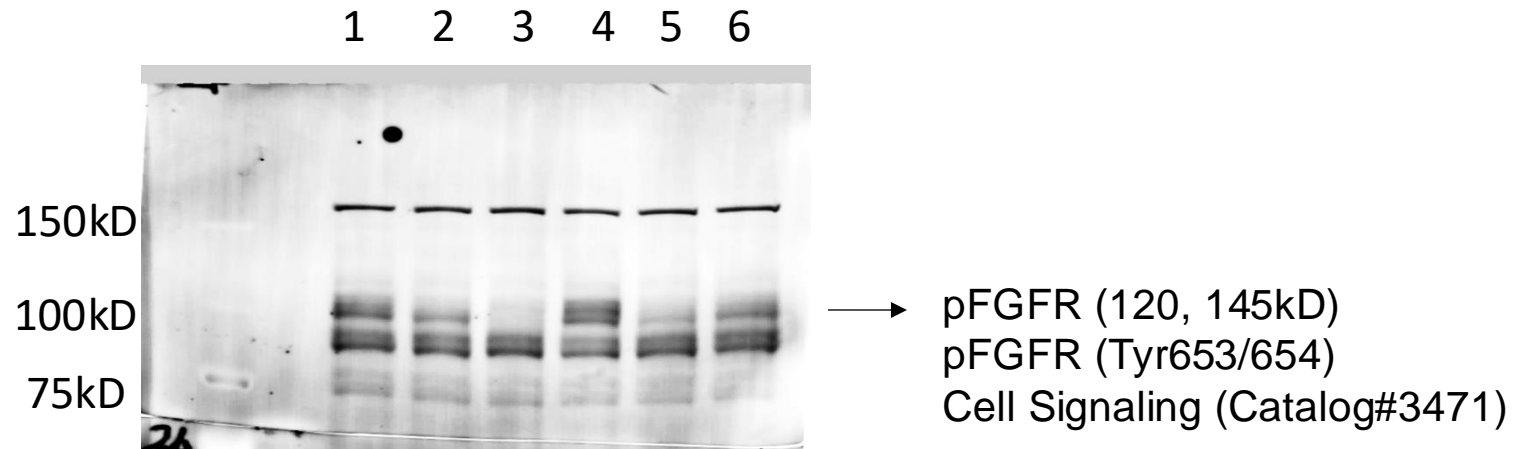

# Full unedited gel for Figure S4A

- 1: ICC21 treated with IgG1 control
- 2: ICC21 treated with BpAb B/C
- 3: ICC21 treated with BpAb B/D
- 4: ICC21 treated with IgG1 control + FGF10
- 5: ICC21 treated with BpAb B/C + FGF10
- 6: ICC21 treated with BpAb B/D + FGF10

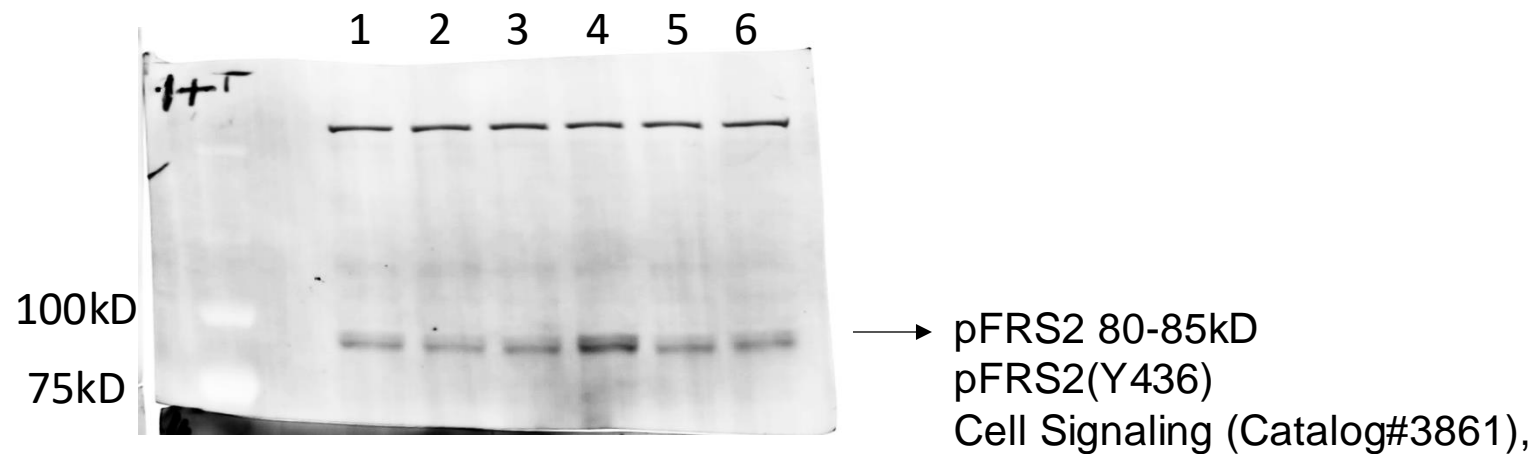

# Full unedited gel for Figure S4A

- 1: ICC21 treated with IgG1 control
- 2: ICC21 treated with BpAb B/C
- 3: ICC21 treated with BpAb B/D
- 4: ICC21 treated with IgG1 control +FGF10
- 5: ICC21 treated with BpAb B/C + FGF10
- 6: ICC21 treated with BpAb B/D + FGF10

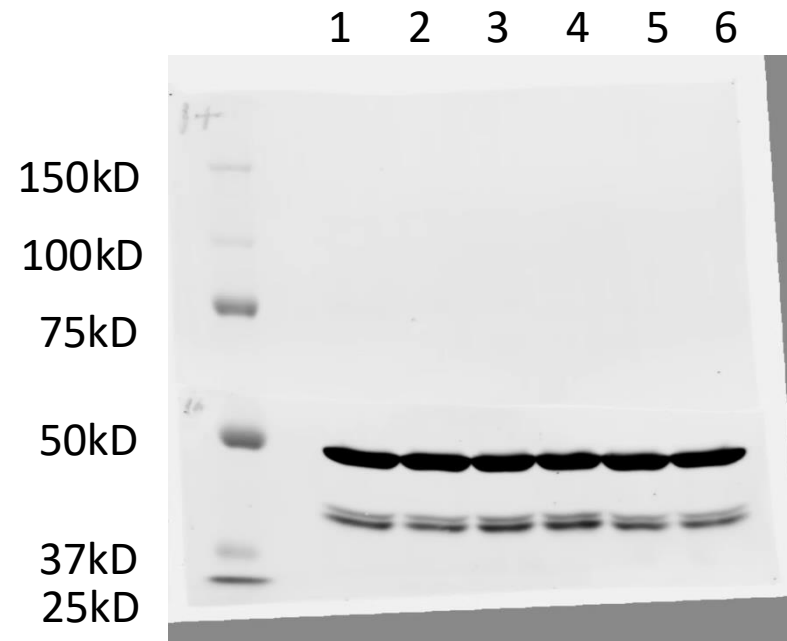

→ Phospho-p44/42 MAPK (Erk1/2) 45kD  
(Thr202/Tyr204)  
Cell Signaling Catalog#9106



# Full unedited gel for Figure S4A

- 1: ICC21 treated with IgG1 control
- 2: ICC21 treated with BpAb B/C
- 3: ICC21 treated with BpAb B/D
- 4: ICC21 treated with IgG1 control + FGF10
- 5: ICC21 treated with BpAb B/C + FGF10
- 6: ICC21 treated with BpAb B/D + FGF10

1 2 3 4 5 6

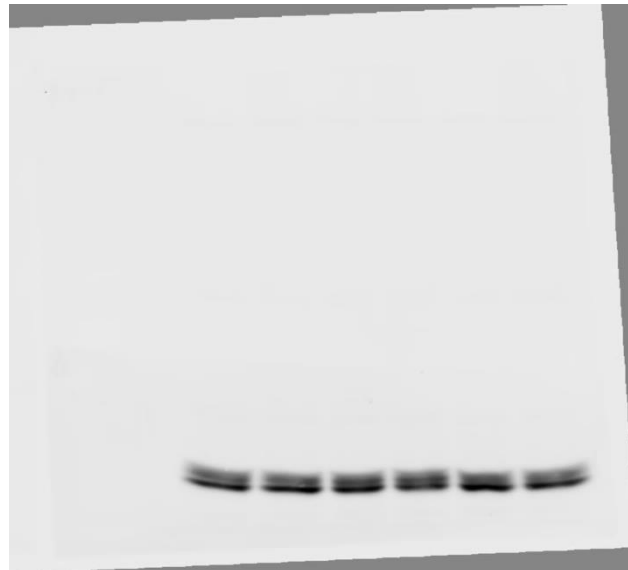

→ p44/42 MAPK (Erk1/2) 42, 44kD  
Cell Signaling Catalog#4695

# Full unedited gel for Figure S4A

- 1: ICC21 treated with IgG1 control
- 2: ICC21 treated with BpAb B/C
- 3: ICC21 treated with BpAb B/D
- 4: ICC21 treated with IgG1 control + FGF10
- 5: ICC21 treated with BpAb B/C + FGF10
- 6: ICC21 treated with BpAb B/D + FGF10

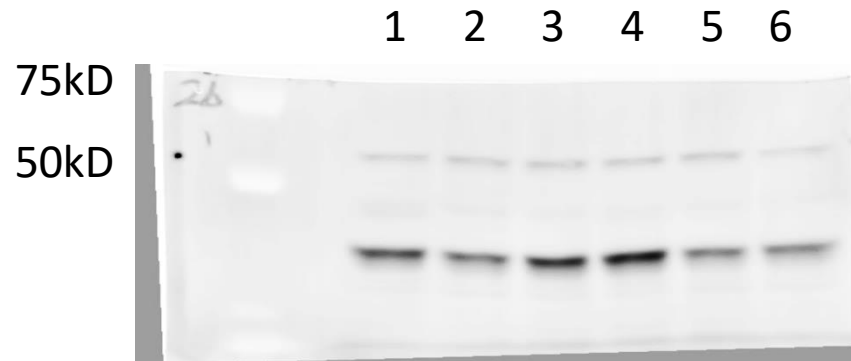

Phospho-MEK1/2 (Ser217/221) 45kD  
Cell Signaling Catalog #9154

# Full unedited gel for Figure S4A

- 1: ICC21 treated with IgG1 control
- 2: ICC21 treated with BpAb B/C
- 3: ICC21 treated with BpAb B/D
- 4: ICC21 treated with IgG1 control + FGF10
- 5: ICC21 treated with BpAb B/C + FGF10
- 6: ICC21 treated with BpAb B/D + FGF10

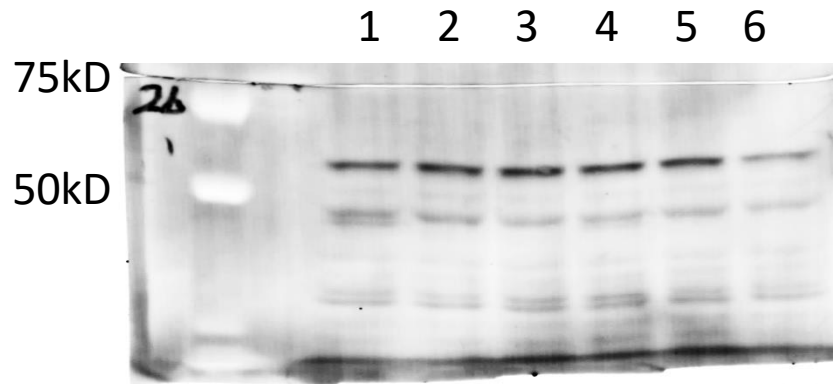

→ Phospho-Akt (Ser473), 60kD  
Cell Signaling Catalog #4060

# Full unedited gel for Figure S4A

- 1: ICC21 treated with IgG1 control
- 2: ICC21 treated with BpAb B/C
- 3: ICC21 treated with BpAb B/D
- 4: ICC21 treated with IgG1 control + FGF10
- 5: ICC21 treated with BpAb B/C + FGF10
- 6: ICC21 treated with BpAb B/D + FGF10

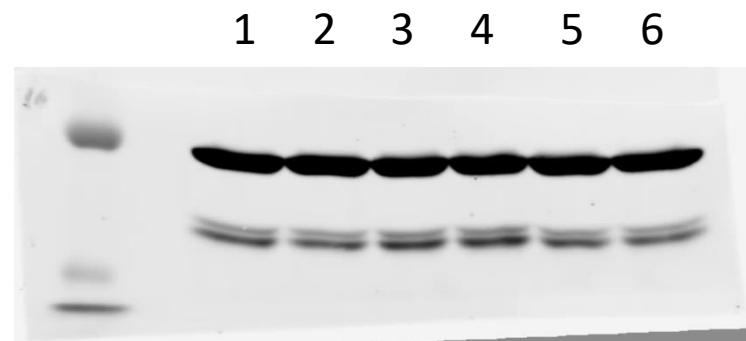

→  $\alpha$ -Tubulin, 52kD  
Cell Signaling Catalog #3873

# Full unedited gel for Figure S4B

- 1: NIH3T3: FGFR2-PHGDH treated with IgG1
- 2: NIH3T3: FGFR2-PHGDH treated with B/D
- 3: NIH3T3: FGFR2-PHGDH treated with B/C

1 2 3

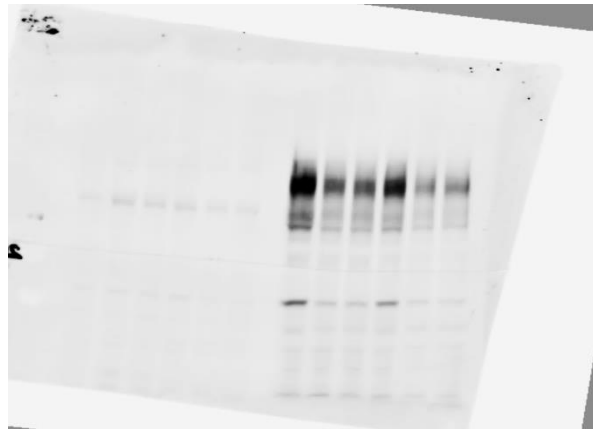

→ pFGFR (120, 145kD)  
pFGFR (Tyr653/654)  
Cell Signaling (Catalog#3471)

# Full unedited gel for Figure S4B

- 1: NIH3T3: FGFR2-PHGDH treated with IgG1
- 2: NIH3T3: FGFR2-PHGDH treated with B/D
- 3: NIH3T3: FGFR2-PHGDH treated with B/C

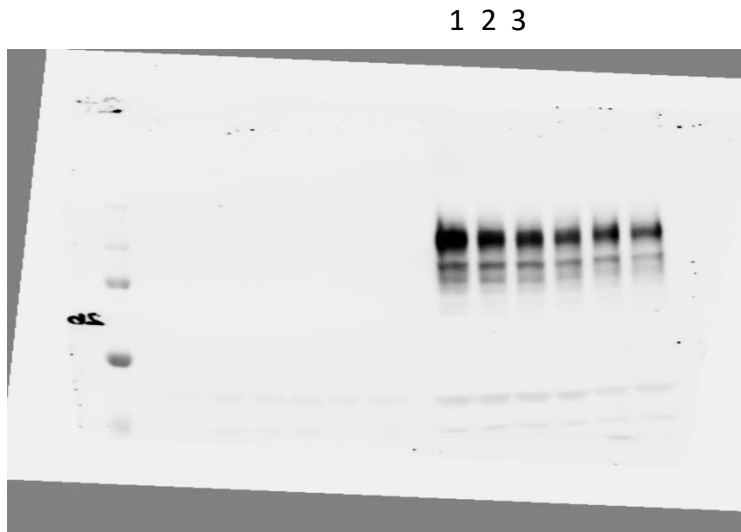

→ total FGFR2 (~130kD)  
Antibody B/D

# Full unedited gel for Figure S4B

- 1: NIH3T3: FGFR2-PHGDH treated with IgG1
- 2: NIH3T3: FGFR2-PHGDH treated with B/D
- 3: NIH3T3: FGFR2-PHGDH treated with B/C

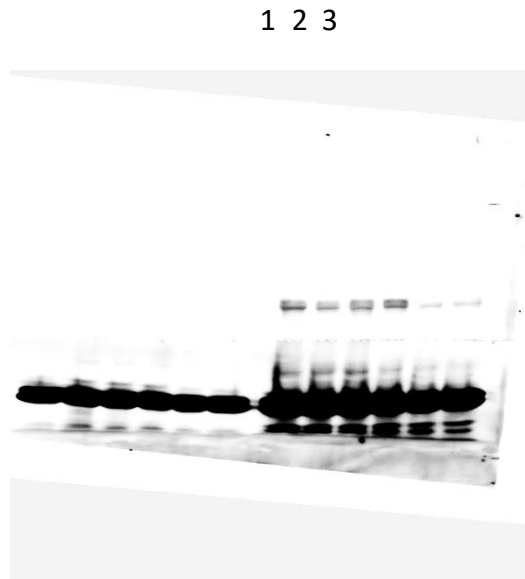

→ pFRS2 80-85kD  
pFRS2(Y436)  
Cell Signaling (Catalog#3861),

# Full unedited gel for Figure S4B

- 1: NIH3T3: FGFR2-PHGDH treated with IgG1
- 2: NIH3T3: FGFR2-PHGDH treated with B/D
- 3: NIH3T3: FGFR2-PHGDH treated with B/C

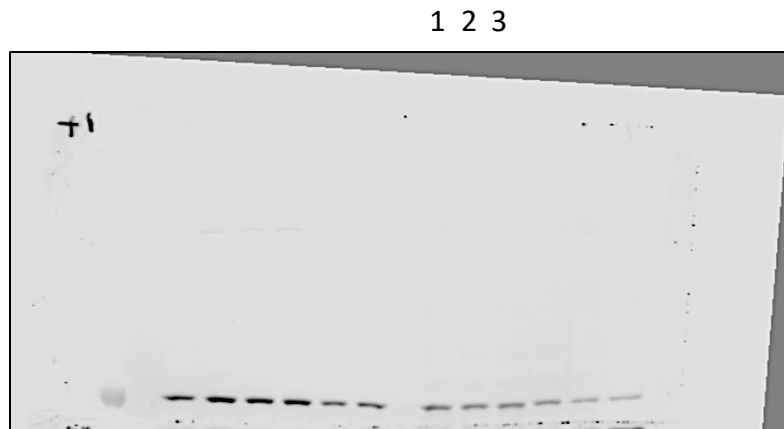



# Full unedited gel for Figure S4B

- 1: NIH3T3: FGFR2-PHGDH treated with IgG1
- 2: NIH3T3: FGFR2-PHGDH treated with B/D
- 3: NIH3T3: FGFR2-PHGDH treated with B/C

1 2 3

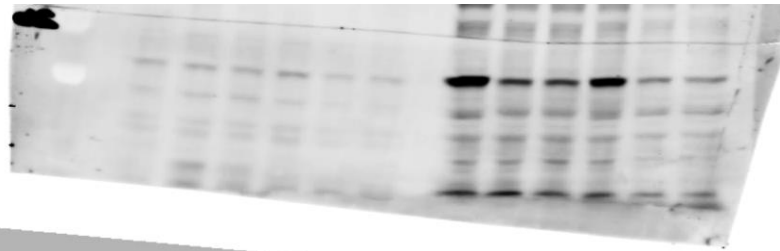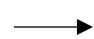

Phospho-Akt (Ser473), 60kD  
Cell Signaling Catalog #4060

# Full unedited gel for Figure S4B

- 1: NIH3T3: FGFR2-PHGDH treated with IgG1
- 2: NIH3T3: FGFR2-PHGDH treated with B/D
- 3: NIH3T3: FGFR2-PHGDH treated with B/C

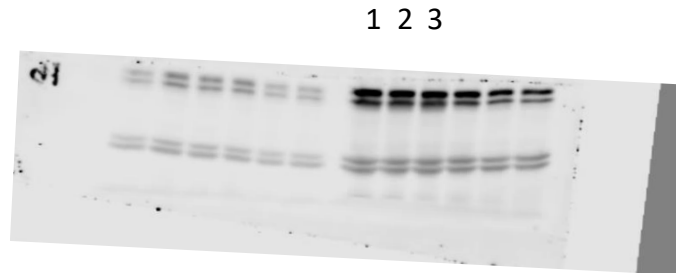

Akt (pan), 60kD  
Cell Signaling Catalog #2920

# Full unedited gel for Figure S4B

- 1: NIH3T3: FGFR2-PHGDH treated with IgG1
- 2: NIH3T3: FGFR2-PHGDH treated with B/D
- 3: NIH3T3: FGFR2-PHGDH treated with B/C

1 2 3

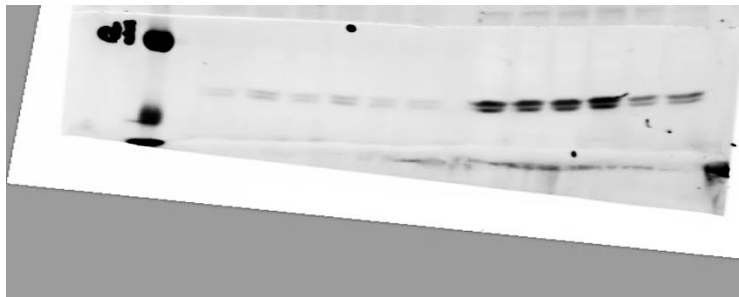

→ Phospho-p44/42 MAPK (Erk1/2) 45kD  
(Thr202/Tyr204)  
Cell Signaling Catalog#9106

# Full unedited gel for Figure S4B

- 1: NIH3T3: FGFR2-PHGDH treated with IgG1
- 2: NIH3T3: FGFR2-PHGDH treated with B/D
- 3: NIH3T3: FGFR2-PHGDH treated with B/C

1 2 3

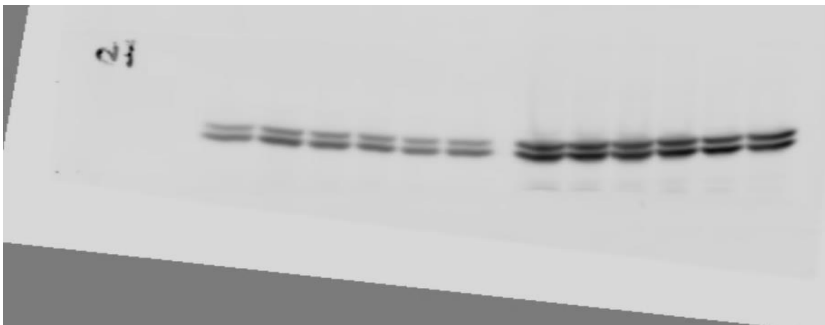

→ p44/42 MAPK (Erk1/2) 42, 44kD  
Cell Signaling Catalog#4695

# Full unedited gel for Figure S4B

- 1: NIH3T3: FGFR2-PHGDH treated with IgG1
- 2: NIH3T3: FGFR2-PHGDH treated with B/D
- 3: NIH3T3: FGFR2-PHGDH treated with B/C

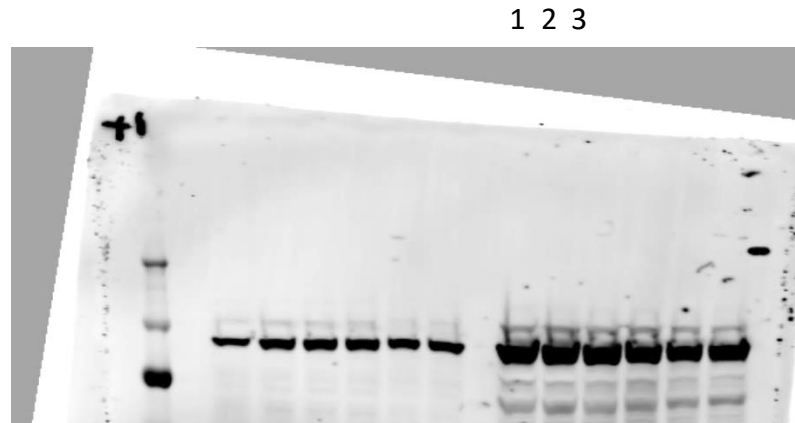

Vinculin 116kD  
Abcam (Catalog#V9131)

# Full unedited gel for Figure 5E

- 1: BaF3: FGFR2-PHGHD xenograft untreated Rep#1
- 2: BaF3: FGFR2-PHGHD xenograft untreated Rep#2
- 3: BaF3: FGFR2-PHGHD xenograft untreated Rep#3
- 4: BaF3: FGFR2-PHGHD xenograft treated with IgG1 15mg/kg Rep#1
- 5: BaF3: FGFR2-PHGHD xenograft treated with IgG1 15mg/kg Rep#2
- 6: BaF3: FGFR2-PHGHD xenograft treated with B/D 25mg/kg Rep#1
- 7: BaF3: FGFR2-PHGHD xenograft treated with B/D 25mg/kg Rep#2
- 8: BaF3: FGFR2-PHGHD xenograft treated with B/D 25mg/kg Rep#3
- 9: BaF3: FGFR2-PHGHD xenograft treated with B/C 25mg/kg Rep#1
- 10: BaF3: FGFR2-PHGHD xenograft treated with B/C 25mg/kg Rep#2
- 11: BaF3: FGFR2-PHGHD xenograft treated with B/C 25mg/kg Rep#3

1 2 3 4 5 6 7 8 9 10 11

150kD

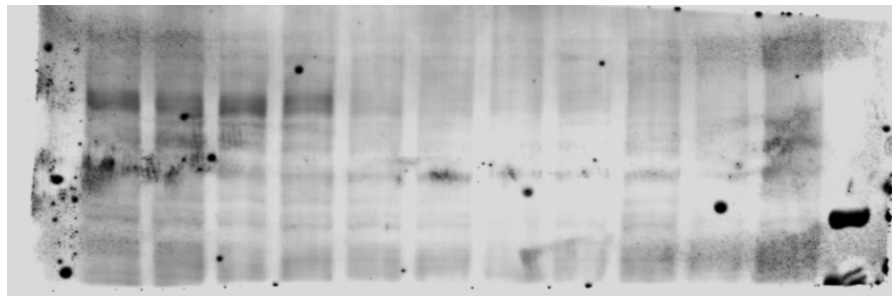

→ pFGFR (120, 145kD)  
pFGFR (Tyr653/654)  
Cell Signaling (Catalog#3471)

# Full unedited gel for Figure 5E

- 1: BaF3: FGFR2-PHGHD xenograft untreated Rep#1
- 2: BaF3: FGFR2-PHGHD xenograft untreated Rep#2
- 3: BaF3: FGFR2-PHGHD xenograft untreated Rep#3
- 4: BaF3: FGFR2-PHGHD xenograft treated with IgG1 15mg/kg Rep#1
- 5: BaF3: FGFR2-PHGHD xenograft treated with IgG1 15mg/kg Rep#2
- 6: BaF3: FGFR2-PHGHD xenograft treated with B/D 25mg/kg Rep#1
- 7: BaF3: FGFR2-PHGHD xenograft treated with B/D 25mg/kg Rep#2
- 8: BaF3: FGFR2-PHGHD xenograft treated with B/D 25mg/kg Rep#3
- 9: BaF3: FGFR2-PHGHD xenograft treated with B/C 25mg/kg Rep#1
- 10: BaF3: FGFR2-PHGHD xenograft treated with B/C 25mg/kg Rep#2
- 11: BaF3: FGFR2-PHGHD xenograft treated with B/C 25mg/kg Rep#3

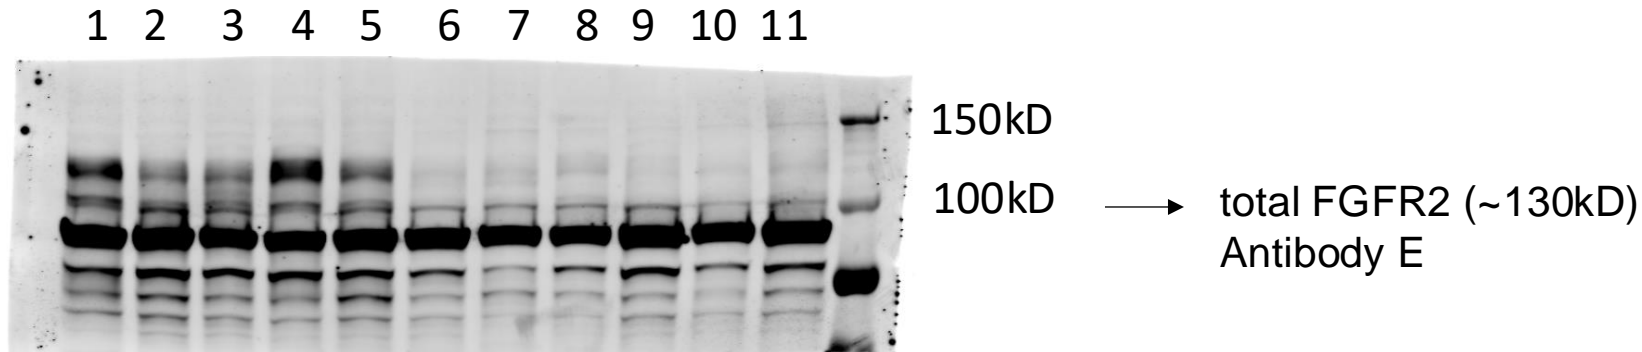

# Full unedited gel for Figure 5E

- 1: BaF3: FGFR2-PHGHD xenograft untreated Rep#1
- 2: BaF3: FGFR2-PHGHD xenograft untreated Rep#2
- 3: BaF3: FGFR2-PHGHD xenograft untreated Rep#3
- 4: BaF3: FGFR2-PHGHD xenograft treated with IgG1 15mg/kg Rep#1
- 5: BaF3: FGFR2-PHGHD xenograft treated with IgG1 15mg/kg Rep#2
- 6: BaF3: FGFR2-PHGHD xenograft treated with B/D 25mg/kg Rep#1
- 7: BaF3: FGFR2-PHGHD xenograft treated with B/D 25mg/kg Rep#2
- 8: BaF3: FGFR2-PHGHD xenograft treated with B/D 25mg/kg Rep#3
- 9: BaF3: FGFR2-PHGHD xenograft treated with B/C 25mg/kg Rep#1
- 10: BaF3: FGFR2-PHGHD xenograft treated with B/C 25mg/kg Rep#2
- 11: BaF3: FGFR2-PHGHD xenograft treated with B/C 25mg/kg Rep#3

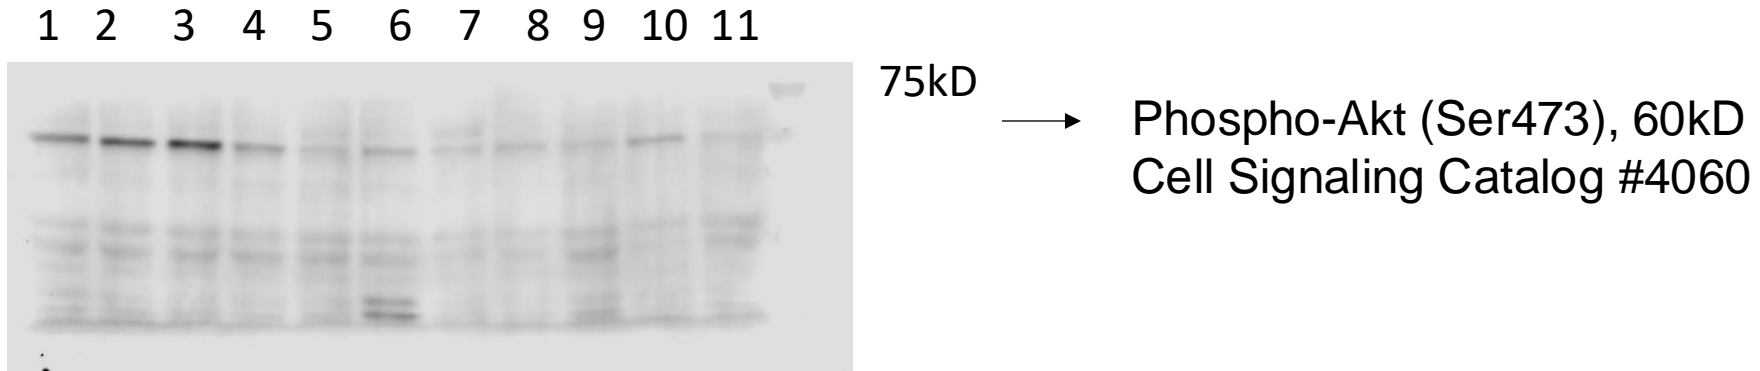



# Full unedited gel for Figure 5E

- 1: BaF3: FGFR2-PHGHD xenograft untreated Rep#1
- 2: BaF3: FGFR2-PHGHD xenograft untreated Rep#2
- 3: BaF3: FGFR2-PHGHD xenograft untreated Rep#3
- 4: BaF3: FGFR2-PHGHD xenograft treated with IgG1 15mg/kg Rep#1
- 5: BaF3: FGFR2-PHGHD xenograft treated with IgG1 15mg/kg Rep#2
- 6: BaF3: FGFR2-PHGHD xenograft treated with B/D 25mg/kg Rep#1
- 7: BaF3: FGFR2-PHGHD xenograft treated with B/D 25mg/kg Rep#2
- 8: BaF3: FGFR2-PHGHD xenograft treated with B/D 25mg/kg Rep#3
- 9: BaF3: FGFR2-PHGHD xenograft treated with B/C 25mg/kg Rep#1
- 10: BaF3: FGFR2-PHGHD xenograft treated with B/C 25mg/kg Rep#2
- 11: BaF3: FGFR2-PHGHD xenograft treated with B/C 25mg/kg Rep#3

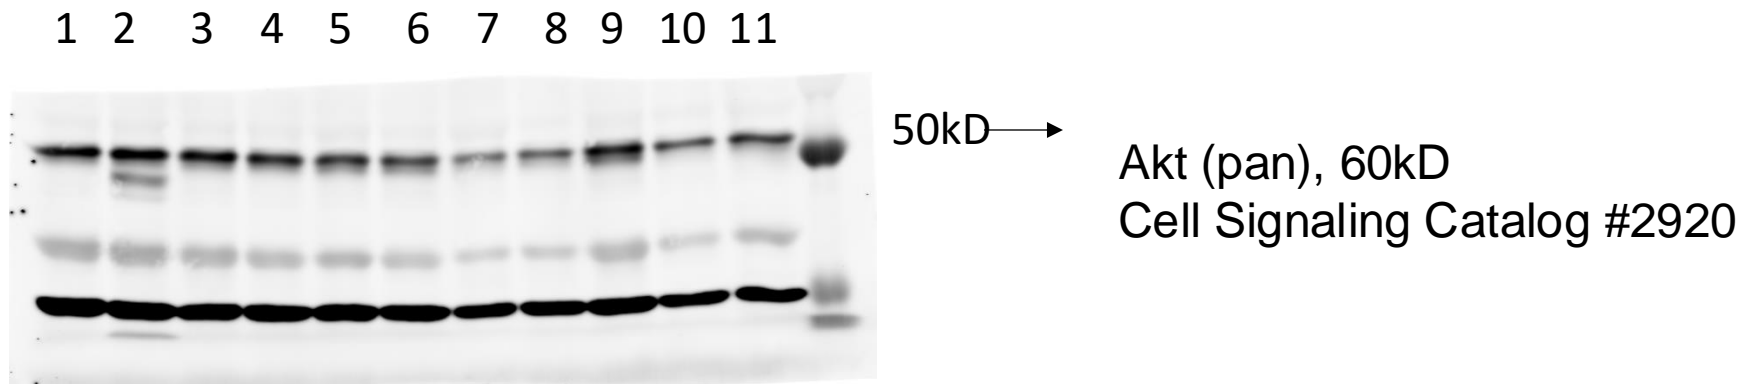

# Full unedited gel for Figure 5E

- 1: BaF3: FGFR2-PHGHD xenograft untreated Rep#1
- 2: BaF3: FGFR2-PHGHD xenograft untreated Rep#2
- 3: BaF3: FGFR2-PHGHD xenograft untreated Rep#3
- 4: BaF3: FGFR2-PHGHD xenograft treated with IgG1 15mg/kg Rep#1
- 5: BaF3: FGFR2-PHGHD xenograft treated with IgG1 15mg/kg Rep#2
- 6: BaF3: FGFR2-PHGHD xenograft treated with B/D 25mg/kg Rep#1
- 7: BaF3: FGFR2-PHGHD xenograft treated with B/D 25mg/kg Rep#2
- 8: BaF3: FGFR2-PHGHD xenograft treated with B/D 25mg/kg Rep#3
- 9: BaF3: FGFR2-PHGHD xenograft treated with B/C 25mg/kg Rep#1
- 10: BaF3: FGFR2-PHGHD xenograft treated with B/C 25mg/kg Rep#2
- 11: BaF3: FGFR2-PHGHD xenograft treated with B/C 25mg/kg Rep#3

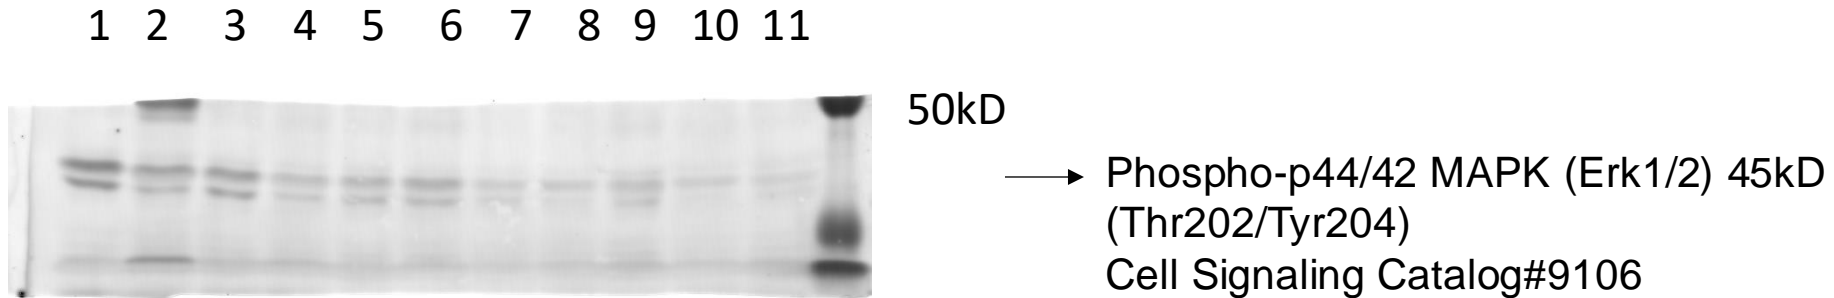

# Full unedited gel for Figure 5E

- 1: BaF3: FGFR2-PHGHD xenograft untreated Rep#1
- 2: BaF3: FGFR2-PHGHD xenograft untreated Rep#2
- 3: BaF3: FGFR2-PHGHD xenograft untreated Rep#3
- 4: BaF3: FGFR2-PHGHD xenograft treated with IgG1 15mg/kg Rep#1
- 5: BaF3: FGFR2-PHGHD xenograft treated with IgG1 15mg/kg Rep#2
- 6: BaF3: FGFR2-PHGHD xenograft treated with B/D 25mg/kg Rep#1
- 7: BaF3: FGFR2-PHGHD xenograft treated with B/D 25mg/kg Rep#2
- 8: BaF3: FGFR2-PHGHD xenograft treated with B/D 25mg/kg Rep#3
- 9: BaF3: FGFR2-PHGHD xenograft treated with B/C 25mg/kg Rep#1
- 10: BaF3: FGFR2-PHGHD xenograft treated with B/C 25mg/kg Rep#2
- 11: BaF3: FGFR2-PHGHD xenograft treated with B/C 25mg/kg Rep#3

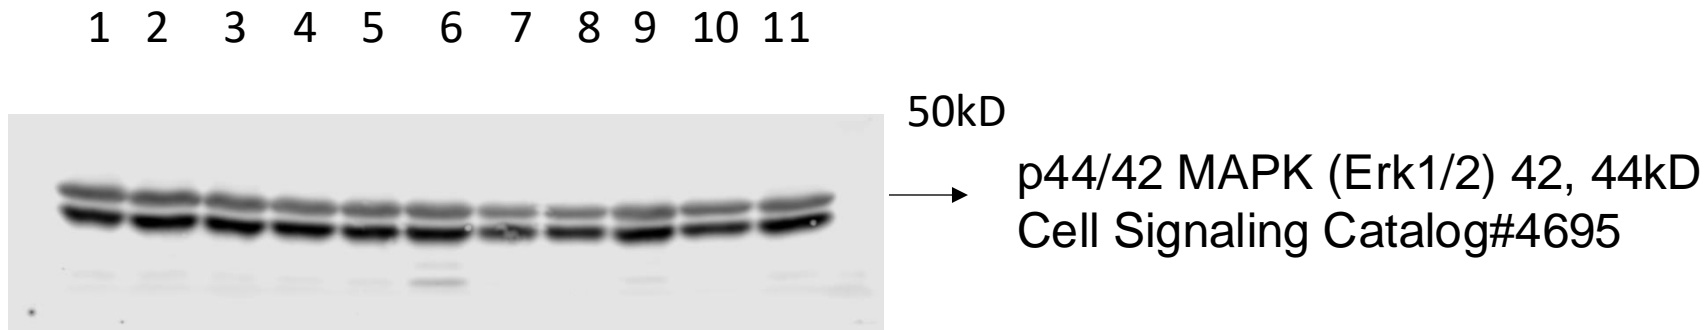

# Full unedited gel for Figure 5E

- 1: BaF3: FGFR2-PHGHD xenograft untreated Rep#1
- 2: BaF3: FGFR2-PHGHD xenograft untreated Rep#2
- 3: BaF3: FGFR2-PHGHD xenograft untreated Rep#3
- 4: BaF3: FGFR2-PHGHD xenograft treated with IgG1 15mg/kg Rep#1
- 5: BaF3: FGFR2-PHGHD xenograft treated with IgG1 15mg/kg Rep#2
- 6: BaF3: FGFR2-PHGHD xenograft treated with B/D 25mg/kg Rep#1
- 7: BaF3: FGFR2-PHGHD xenograft treated with B/D 25mg/kg Rep#2
- 8: BaF3: FGFR2-PHGHD xenograft treated with B/D 25mg/kg Rep#3
- 9: BaF3: FGFR2-PHGHD xenograft treated with B/C 25mg/kg Rep#1
- 10: BaF3: FGFR2-PHGHD xenograft treated with B/C 25mg/kg Rep#2
- 11: BaF3: FGFR2-PHGHD xenograft treated with B/C 25mg/kg Rep#3

1 2 3 4 5 6 7 8 9 10 11

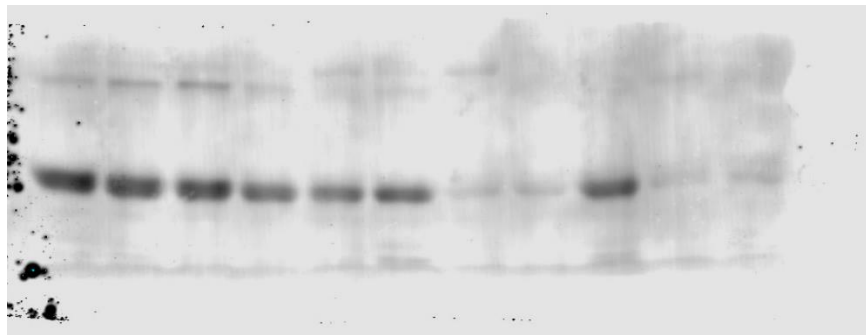

→ Phospho-MEK1/2 (Ser217/221) 45kD  
Cell Signaling Catalog #9154

# Full unedited gel for Figure 5E

- 1: BaF3: FGFR2-PHGHD xenograft untreated Rep#1
- 2: BaF3: FGFR2-PHGHD xenograft untreated Rep#2
- 3: BaF3: FGFR2-PHGHD xenograft untreated Rep#3
- 4: BaF3: FGFR2-PHGHD xenograft treated with IgG1 15mg/kg Rep#1
- 5: BaF3: FGFR2-PHGHD xenograft treated with IgG1 15mg/kg Rep#2
- 6: BaF3: FGFR2-PHGHD xenograft treated with B/D 25mg/kg Rep#1
- 7: BaF3: FGFR2-PHGHD xenograft treated with B/D 25mg/kg Rep#2
- 8: BaF3: FGFR2-PHGHD xenograft treated with B/D 25mg/kg Rep#3
- 9: BaF3: FGFR2-PHGHD xenograft treated with B/C 25mg/kg Rep#1
- 10: BaF3: FGFR2-PHGHD xenograft treated with B/C 25mg/kg Rep#2
- 11: BaF3: FGFR2-PHGHD xenograft treated with B/C 25mg/kg Rep#3

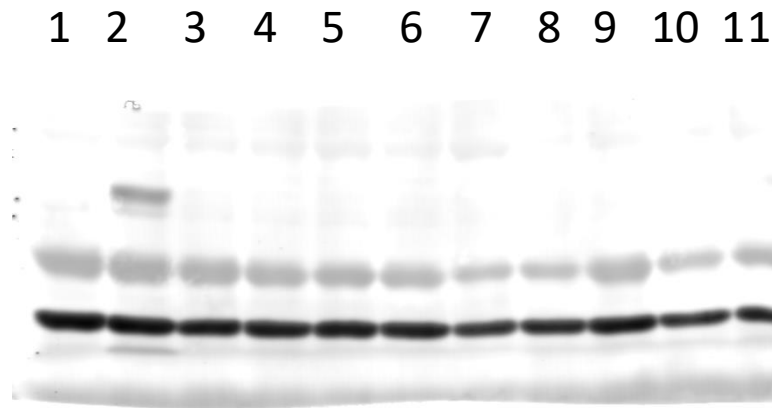

→ MEK1/2 (L38C12), 45kD  
Cell Signaling Catalog #4694

# Full unedited gel for Figure 5E

- 1: BaF3: FGFR2-PHGHD xenograft untreated Rep#1
- 2: BaF3: FGFR2-PHGHD xenograft untreated Rep#2
- 3: BaF3: FGFR2-PHGHD xenograft untreated Rep#3
- 4: BaF3: FGFR2-PHGHD xenograft treated with IgG1 15mg/kg Rep#1
- 5: BaF3: FGFR2-PHGHD xenograft treated with IgG1 15mg/kg Rep#2
- 6: BaF3: FGFR2-PHGHD xenograft treated with B/D 25mg/kg Rep#1
- 7: BaF3: FGFR2-PHGHD xenograft treated with B/D 25mg/kg Rep#2
- 8: BaF3: FGFR2-PHGHD xenograft treated with B/D 25mg/kg Rep#3
- 9: BaF3: FGFR2-PHGHD xenograft treated with B/C 25mg/kg Rep#1
- 10: BaF3: FGFR2-PHGHD xenograft treated with B/C 25mg/kg Rep#2
- 11: BaF3: FGFR2-PHGHD xenograft treated with B/C 25mg/kg Rep#3

1 2 3 4 5 6 7 8 9 10 11

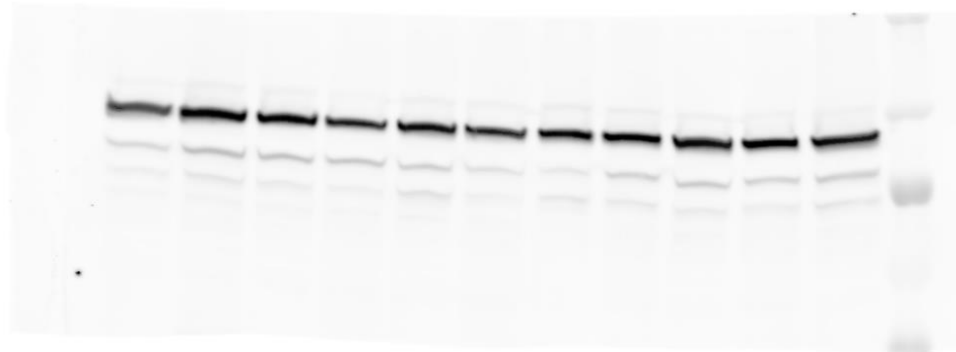

→ Vinculin 116kD  
Abcam (Catalog#V9131)

# Full unedited gel for Figure 5F

- 1: ICC13-7 xenograft treated with IgG1 control Rep#1
- 2: ICC13-7 xenograft treated with IgG1 control Rep#2
- 3: ICC13-7 xenograft treated with IgG1 control Rep#3
- 4: ICC13-7 xenograft treated with B/D 10mg/kg Rep#1
- 5: ICC13-7 xenograft treated with B/D 10mg/kg Rep#2
- 6: ICC13-7 xenograft treated with B/D 30mg/kg Rep#1
- 7: ICC13-7 xenograft treated with B/D 30mg/kg Rep#2
- 8: ICC13-7 xenograft treated with B/D 30mg/kg Rep#3
- 9: ICC13-7 xenograft treated with B/C 10mg/kg Rep#1
- 10: ICC13-7 xenograft treated with B/C 10mg/kg Rep#2
- 11: ICC13-7 xenograft treated with B/C 30mg/kg Rep#1
- 12: ICC13-7 xenograft treated with B/C 30mg/kg Rep#2
- 13: ICC13-7 xenograft treated with B/C 30mg/kg Rep#3

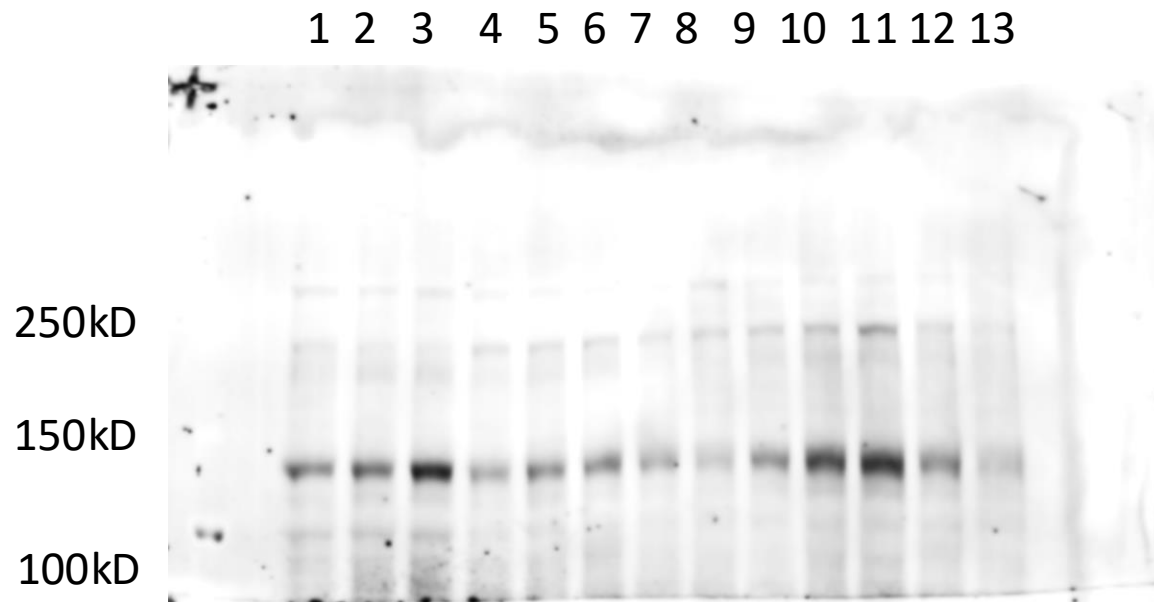

# Full unedited gel for Figure 5F

1 2 3 4 5 6 7 8 9 10 11 12 13

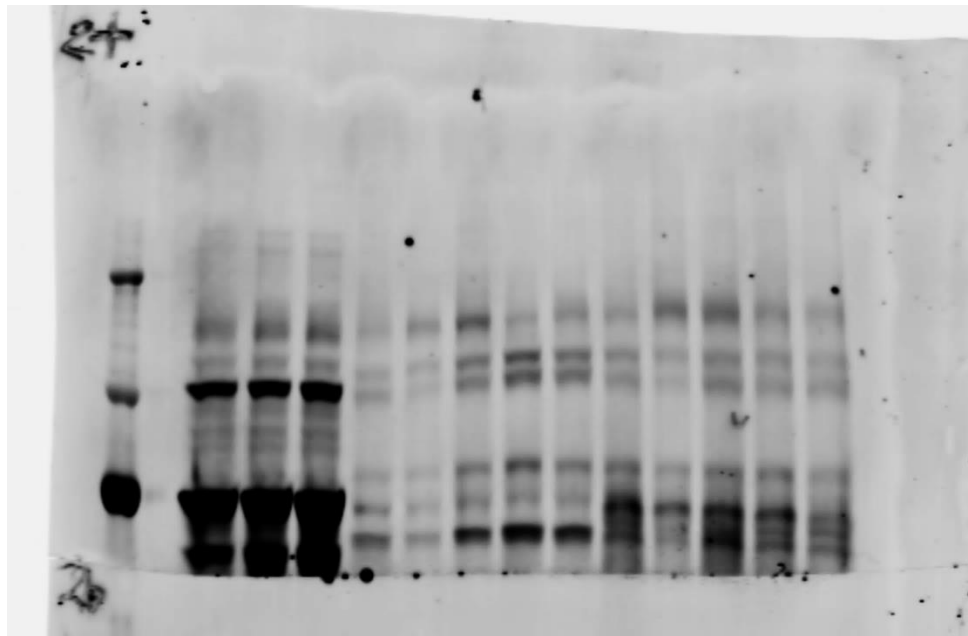

- 1: ICC13-7 xenograft treated with IgG1 control Rep#1
- 2: ICC13-7 xenograft treated with IgG1 control Rep#2
- 3: ICC13-7 xenograft treated with IgG1 control Rep#3
- 4: ICC13-7 xenograft treated with B/D 10mg/kg Rep#1
- 5: ICC13-7 xenograft treated with B/D 10mg/kg Rep#2
- 6: ICC13-7 xenograft treated with B/D 30mg/kg Rep#1
- 7: ICC13-7 xenograft treated with B/D 30mg/kg Rep#2
- 8: ICC13-7 xenograft treated with B/D 30mg/kg Rep#3
- 9: ICC13-7 xenograft treated with B/C 10mg/kg Rep#1
- 10: ICC13-7 xenograft treated with B/C 10mg/kg Rep#2
- 11: ICC13-7 xenograft treated with B/C 30mg/kg Rep#1
- 12: ICC13-7 xenograft treated with B/C 30mg/kg Rep#2
- 13: ICC13-7 xenograft treated with B/C 30mg/kg Rep#3

→ total FGFR2 (~130kD)  
Antibody B/D



# Full unedited gel for Figure 5F

- 1: ICC13-7 xenograft treated with IgG1 control Rep#1
- 2: ICC13-7 xenograft treated with IgG1 control Rep#2
- 3: ICC13-7 xenograft treated with IgG1 control Rep#3
- 4: ICC13-7 xenograft treated with B/D 10mg/kg Rep#1
- 5: ICC13-7 xenograft treated with B/D 10mg/kg Rep#2
- 6: ICC13-7 xenograft treated with B/D 30mg/kg Rep#1
- 7: ICC13-7 xenograft treated with B/D 30mg/kg Rep#2
- 8: ICC13-7 xenograft treated with B/D 30mg/kg Rep#3
- 9: ICC13-7 xenograft treated with B/C 10mg/kg Rep#1
- 10: ICC13-7 xenograft treated with B/C 10mg/kg Rep#2
- 11: ICC13-7 xenograft treated with B/C 30mg/kg Rep#1
- 12: ICC13-7 xenograft treated with B/C 30mg/kg Rep#2
- 13: ICC13-7 xenograft treated with B/C 30mg/kg Rep#3

1 2 3 4 5 6 7 8 9 10 11 12 13

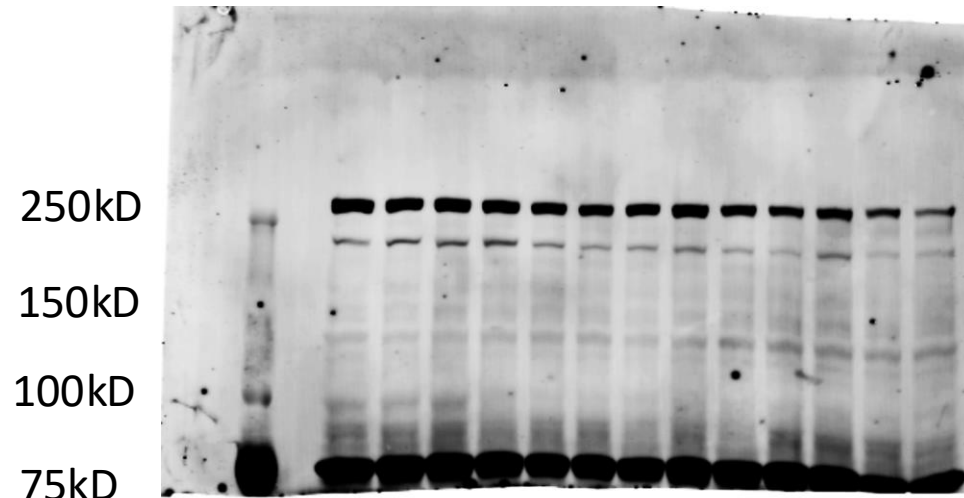

→ pFRS2 80-85kD  
pFRS2(Y436)  
Cell Signaling (Catalog#3861),

# Full unedited gel for Figure 5F

- 1: ICC13-7 xenograft treated with IgG1 control Rep#1
- 2: ICC13-7 xenograft treated with IgG1 control Rep#2
- 3: ICC13-7 xenograft treated with IgG1 control Rep#3
- 4: ICC13-7 xenograft treated with B/D 10mg/kg Rep#1
- 5: ICC13-7 xenograft treated with B/D 10mg/kg Rep#2
- 6: ICC13-7 xenograft treated with B/D 30mg/kg Rep#1
- 7: ICC13-7 xenograft treated with B/D 30mg/kg Rep#2
- 8: ICC13-7 xenograft treated with B/D 30mg/kg Rep#3
- 9: ICC13-7 xenograft treated with B/C 10mg/kg Rep#1
- 10: ICC13-7 xenograft treated with B/C 10mg/kg Rep#2
- 11: ICC13-7 xenograft treated with B/C 30mg/kg Rep#1
- 12: ICC13-7 xenograft treated with B/C 30mg/kg Rep#2
- 13: ICC13-7 xenograft treated with B/C 30mg/kg Rep#3

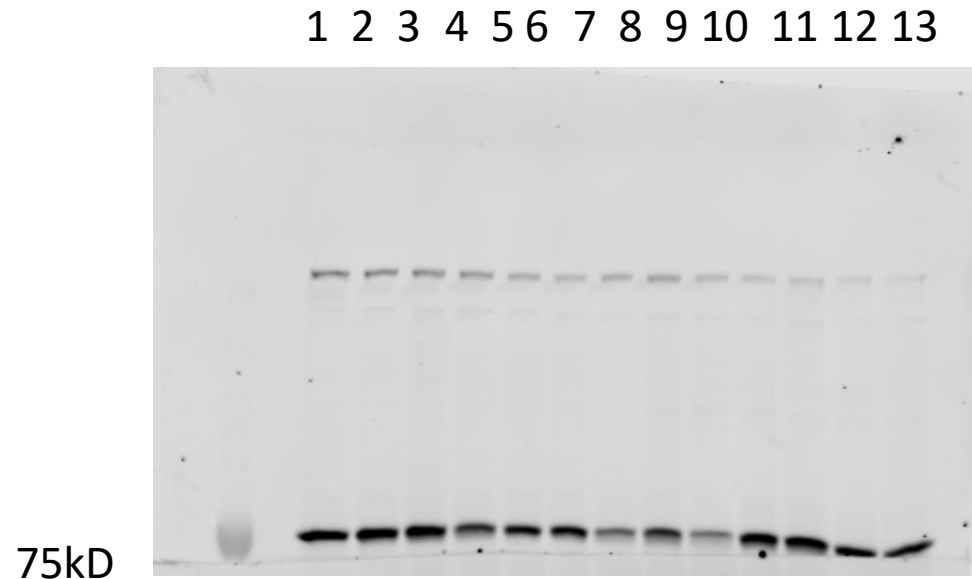

→ tFRS2 80-85kD  
FRS2(Abcam, Catalog#ab183492)

# Full unedited gel for Figure 5F

- 1: ICC13-7 xenograft treated with IgG1 control Rep#1
- 2: ICC13-7 xenograft treated with IgG1 control Rep#2
- 3: ICC13-7 xenograft treated with IgG1 control Rep#3
- 4: ICC13-7 xenograft treated with B/D 10mg/kg Rep#1
- 5: ICC13-7 xenograft treated with B/D 10mg/kg Rep#2
- 6: ICC13-7 xenograft treated with B/D 30mg/kg Rep#1
- 7: ICC13-7 xenograft treated with B/D 30mg/kg Rep#2
- 8: ICC13-7 xenograft treated with B/D 30mg/kg Rep#3
- 9: ICC13-7 xenograft treated with B/C 10mg/kg Rep#1
- 10: ICC13-7 xenograft treated with B/C 10mg/kg Rep#2
- 11: ICC13-7 xenograft treated with B/C 30mg/kg Rep#1
- 12: ICC13-7 xenograft treated with B/C 30mg/kg Rep#2
- 13: ICC13-7 xenograft treated with B/C 30mg/kg Rep#3

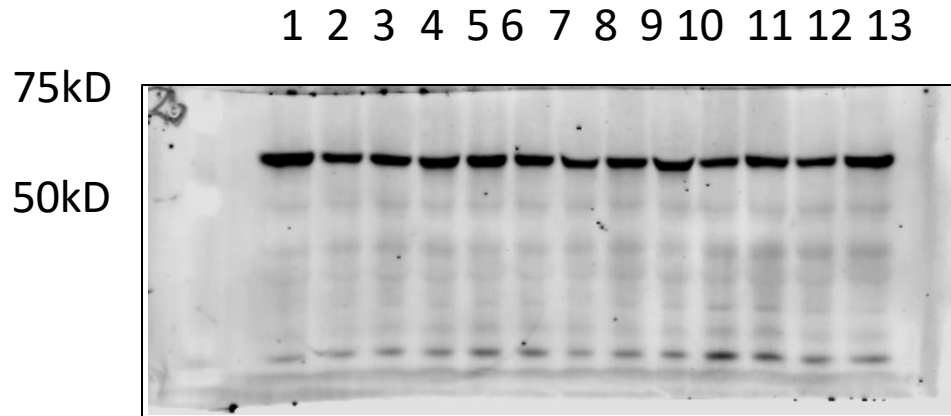

→ Phospho-Akt (Ser473), 60kD  
Cell Signaling Catalog #4060

# Full unedited gel for Figure 5F

- 1: ICC13-7 xenograft treated with IgG1 control Rep#1
- 2: ICC13-7 xenograft treated with IgG1 control Rep#2
- 3: ICC13-7 xenograft treated with IgG1 control Rep#3
- 4: ICC13-7 xenograft treated with B/D 10mg/kg Rep#1
- 5: ICC13-7 xenograft treated with B/D 10mg/kg Rep#2
- 6: ICC13-7 xenograft treated with B/D 30mg/kg Rep#1
- 7: ICC13-7 xenograft treated with B/D 30mg/kg Rep#2
- 8: ICC13-7 xenograft treated with B/D 30mg/kg Rep#3
- 9: ICC13-7 xenograft treated with B/C 10mg/kg Rep#1
- 10: ICC13-7 xenograft treated with B/C 10mg/kg Rep#2
- 11: ICC13-7 xenograft treated with B/C 30mg/kg Rep#1
- 12: ICC13-7 xenograft treated with B/C 30mg/kg Rep#2
- 13: ICC13-7 xenograft treated with B/C 30mg/kg Rep#3

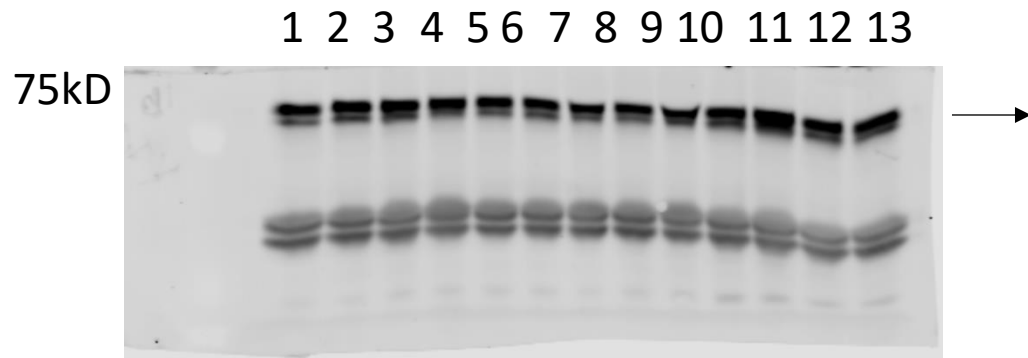

Akt (pan), 60kD  
Cell Signaling Catalog #2920

# Full unedited gel for Figure 5F

- 1: ICC13-7 xenograft treated with IgG1 control Rep#1
- 2: ICC13-7 xenograft treated with IgG1 control Rep#2
- 3: ICC13-7 xenograft treated with IgG1 control Rep#3
- 4: ICC13-7 xenograft treated with B/D 10mg/kg Rep#1
- 5: ICC13-7 xenograft treated with B/D 10mg/kg Rep#2
- 6: ICC13-7 xenograft treated with B/D 30mg/kg Rep#1
- 7: ICC13-7 xenograft treated with B/D 30mg/kg Rep#2
- 8: ICC13-7 xenograft treated with B/D 30mg/kg Rep#3
- 9: ICC13-7 xenograft treated with B/C 10mg/kg Rep#1
- 10: ICC13-7 xenograft treated with B/C 10mg/kg Rep#2
- 11: ICC13-7 xenograft treated with B/C 30mg/kg Rep#1
- 12: ICC13-7 xenograft treated with B/C 30mg/kg Rep#2
- 13: ICC13-7 xenograft treated with B/C 30mg/kg Rep#3

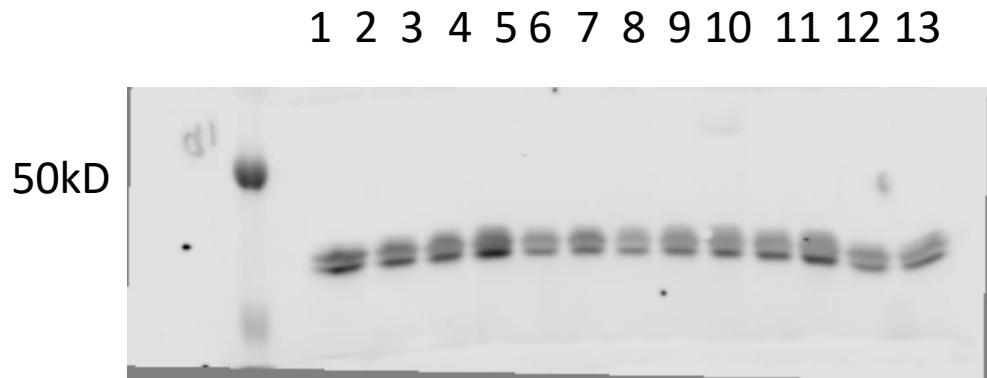

→ Phospho-p44/42 MAPK (Erk1/2) 45kD  
(Thr202/Tyr204)  
Cell Signaling Catalog#9106

# Full unedited gel for Figure 5F

- 1: ICC13-7 xenograft treated with IgG1 control Rep#1
- 2: ICC13-7 xenograft treated with IgG1 control Rep#2
- 3: ICC13-7 xenograft treated with IgG1 control Rep#3
- 4: ICC13-7 xenograft treated with B/D 10mg/kg Rep#1
- 5: ICC13-7 xenograft treated with B/D 10mg/kg Rep#2
- 6: ICC13-7 xenograft treated with B/D 30mg/kg Rep#1
- 7: ICC13-7 xenograft treated with B/D 30mg/kg Rep#2
- 8: ICC13-7 xenograft treated with B/D 30mg/kg Rep#3
- 9: ICC13-7 xenograft treated with B/C 10mg/kg Rep#1
- 10: ICC13-7 xenograft treated with B/C 10mg/kg Rep#2
- 11: ICC13-7 xenograft treated with B/C 30mg/kg Rep#1
- 12: ICC13-7 xenograft treated with B/C 30mg/kg Rep#2
- 13: ICC13-7 xenograft treated with B/C 30mg/kg Rep#3

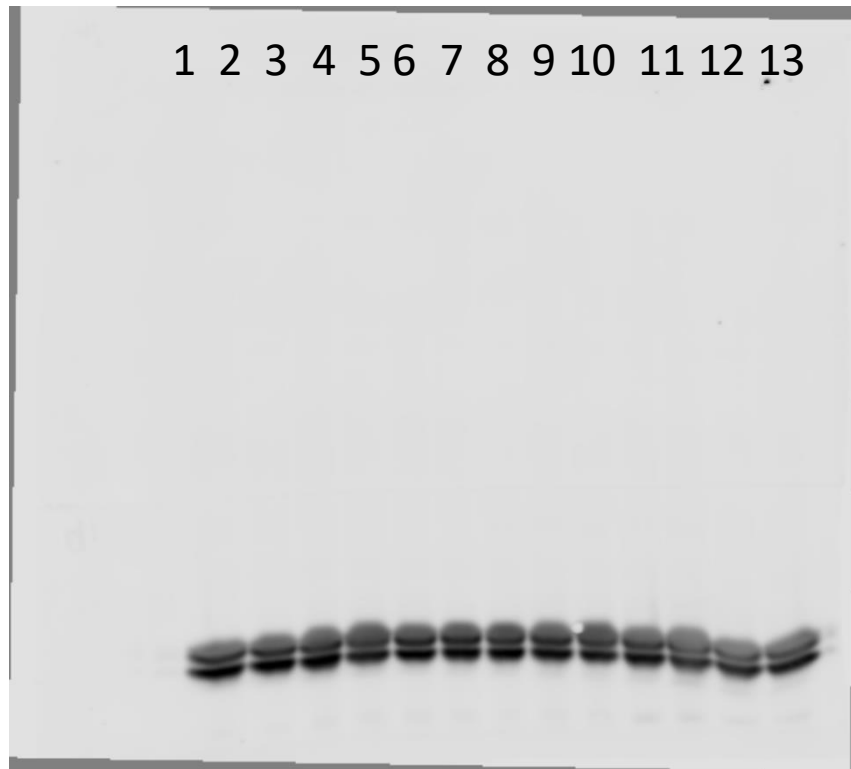

→ p44/42 MAPK (Erk1/2) 42, 44kD  
Cell Signaling Catalog#4695

# Full unedited gel for Figure 5F

- 1: ICC13-7 xenograft treated with IgG1 control Rep#1
- 2: ICC13-7 xenograft treated with IgG1 control Rep#2
- 3: ICC13-7 xenograft treated with IgG1 control Rep#3
- 4: ICC13-7 xenograft treated with B/D 10mg/kg Rep#1
- 5: ICC13-7 xenograft treated with B/D 10mg/kg Rep#2
- 6: ICC13-7 xenograft treated with B/D 30mg/kg Rep#1
- 7: ICC13-7 xenograft treated with B/D 30mg/kg Rep#2
- 8: ICC13-7 xenograft treated with B/D 30mg/kg Rep#3
- 9: ICC13-7 xenograft treated with B/C 10mg/kg Rep#1
- 10: ICC13-7 xenograft treated with B/C 10mg/kg Rep#2
- 11: ICC13-7 xenograft treated with B/C 30mg/kg Rep#1
- 12: ICC13-7 xenograft treated with B/C 30mg/kg Rep#2
- 13: ICC13-7 xenograft treated with B/C 30mg/kg Rep#3

L 1 2 3 4 5 6 7 8 9 10 11 12 13

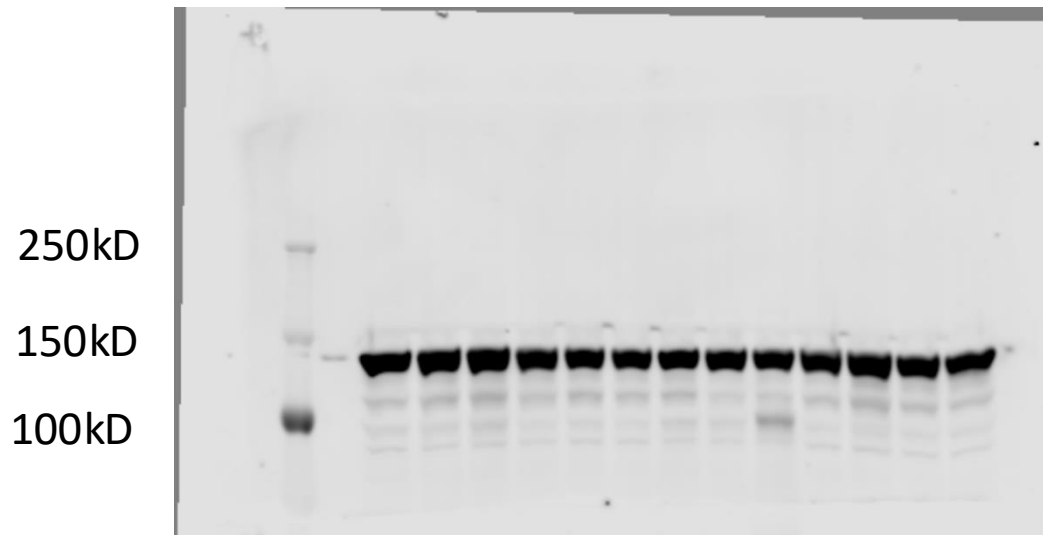

→ Vinculin 116kD  
Abcam (Catalog#V9131)

# Full unedited gel for Figure S5E

- 1: ICC13-7 xenograft treated with IgG1 control Rep#1
- 2: ICC13-7 xenograft treated with IgG1 control Rep#2
- 3: ICC13-7 xenograft treated with IgG1 control Rep#3
- 4: ICC13-7 xenograft treated with B 10mg/kg Rep#1
- 5: ICC13-7 xenograft treated with B 10mg/kg Rep#2
- 6: ICC13-7 xenograft treated with B 10mg/kg Rep#3
- 7: ICC13-7 xenograft treated with D 10mg/kg Rep#1
- 8: ICC13-7 xenograft treated with D 10mg/kg Rep#2
- 9: ICC13-7 xenograft treated with D 10mg/kg Rep#3
- 10: ICC13-7 xenograft treated with C 10mg/kg Rep#1
- 11: ICC13-7 xenograft treated with C 10mg/kg Rep#2
- 12: ICC13-7 xenograft treated with C 10mg/kg Rep#3

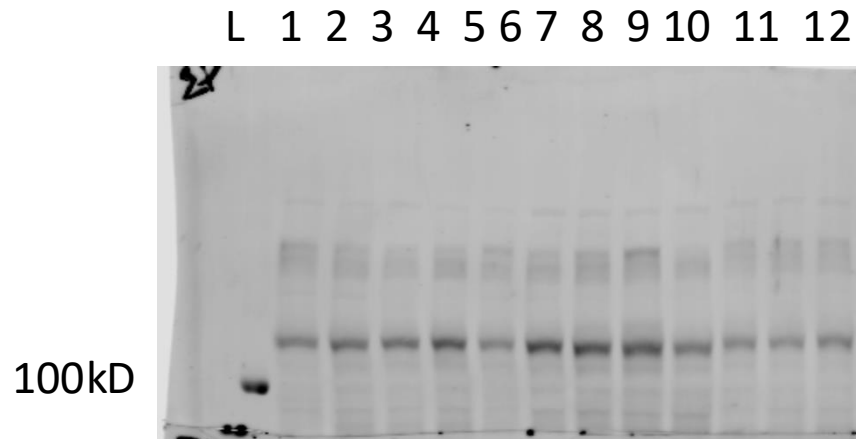

→ pFGFR (120, 145kD)  
pFGFR (Tyr653/654)  
Cell Signaling (Catalog#3471)



# Full unedited gel for Figure S5E

- 1: ICC13-7 xenograft treated with IgG1 control Rep#1
- 2: ICC13-7 xenograft treated with IgG1 control Rep#2
- 3: ICC13-7 xenograft treated with IgG1 control Rep#3
- 4: ICC13-7 xenograft treated with B 10mg/kg Rep#1
- 5: ICC13-7 xenograft treated with B 10mg/kg Rep#2
- 6: ICC13-7 xenograft treated with B 10mg/kg Rep#3
- 7: ICC13-7 xenograft treated with D 10mg/kg Rep#1
- 8: ICC13-7 xenograft treated with D 10mg/kg Rep#2
- 9: ICC13-7 xenograft treated with D 10mg/kg Rep#3
- 10: ICC13-7 xenograft treated with C 10mg/kg Rep#1
- 11: ICC13-7 xenograft treated with C 10mg/kg Rep#2
- 12: ICC13-7 xenograft treated with C 10mg/kg Rep#3

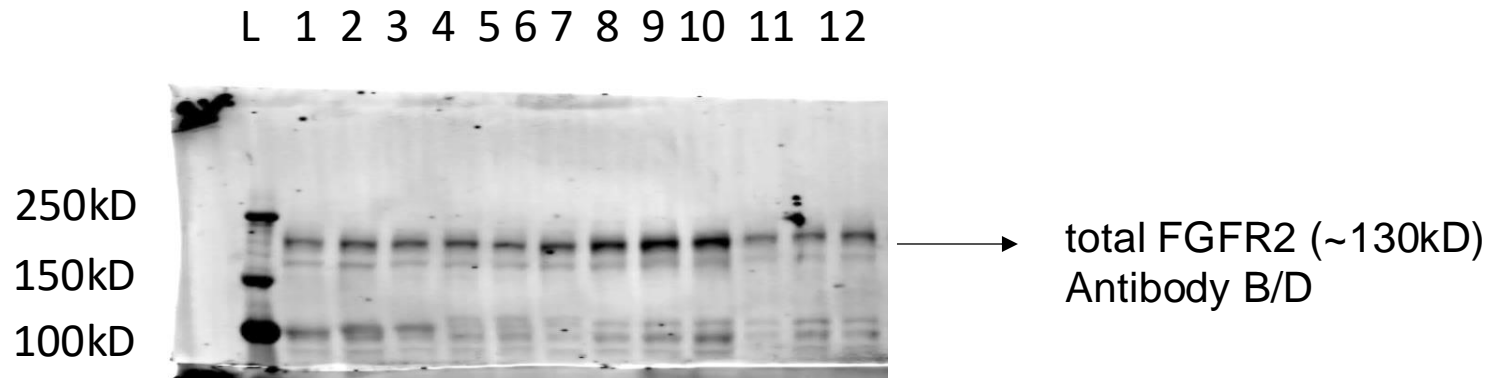

# Full unedited gel for Figure S5E

- 1: ICC13-7 xenograft treated with IgG1 control Rep#1
- 2: ICC13-7 xenograft treated with IgG1 control Rep#2
- 3: ICC13-7 xenograft treated with IgG1 control Rep#3
- 4: ICC13-7 xenograft treated with B 10mg/kg Rep#1
- 5: ICC13-7 xenograft treated with B 10mg/kg Rep#2
- 6: ICC13-7 xenograft treated with B 10mg/kg Rep#3
- 7: ICC13-7 xenograft treated with D 10mg/kg Rep#1
- 8: ICC13-7 xenograft treated with D 10mg/kg Rep#2
- 9: ICC13-7 xenograft treated with D 10mg/kg Rep#3
- 10: ICC13-7 xenograft treated with C 10mg/kg Rep#1
- 11: ICC13-7 xenograft treated with C 10mg/kg Rep#2
- 12: ICC13-7 xenograft treated with C 10mg/kg Rep#3

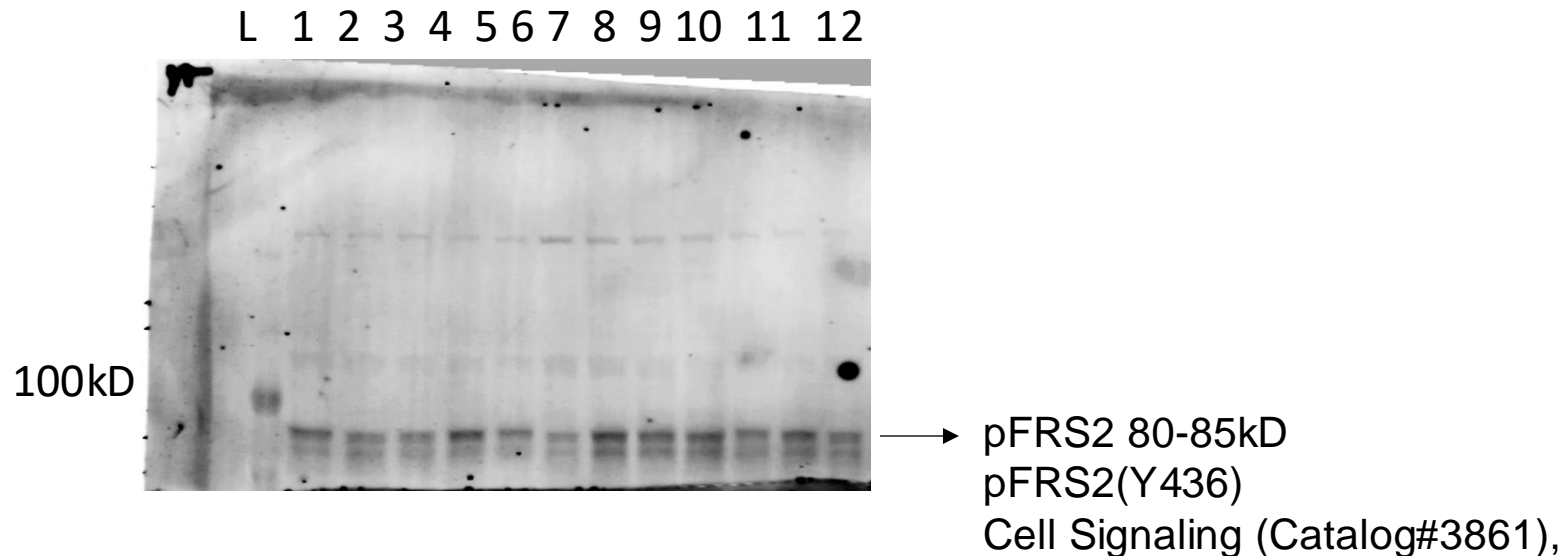

# Full unedited gel for Figure S5E

- 1: ICC13-7 xenograft treated with IgG1 control Rep#1
- 2: ICC13-7 xenograft treated with IgG1 control Rep#2
- 3: ICC13-7 xenograft treated with IgG1 control Rep#3
- 4: ICC13-7 xenograft treated with B 10mg/kg Rep#1
- 5: ICC13-7 xenograft treated with B 10mg/kg Rep#2
- 6: ICC13-7 xenograft treated with B 10mg/kg Rep#3
- 7: ICC13-7 xenograft treated with D 10mg/kg Rep#1
- 8: ICC13-7 xenograft treated with D 10mg/kg Rep#2
- 9: ICC13-7 xenograft treated with D 10mg/kg Rep#3
- 10: ICC13-7 xenograft treated with C 10mg/kg Rep#1
- 11: ICC13-7 xenograft treated with C 10mg/kg Rep#2
- 12: ICC13-7 xenograft treated with C 10mg/kg Rep#3

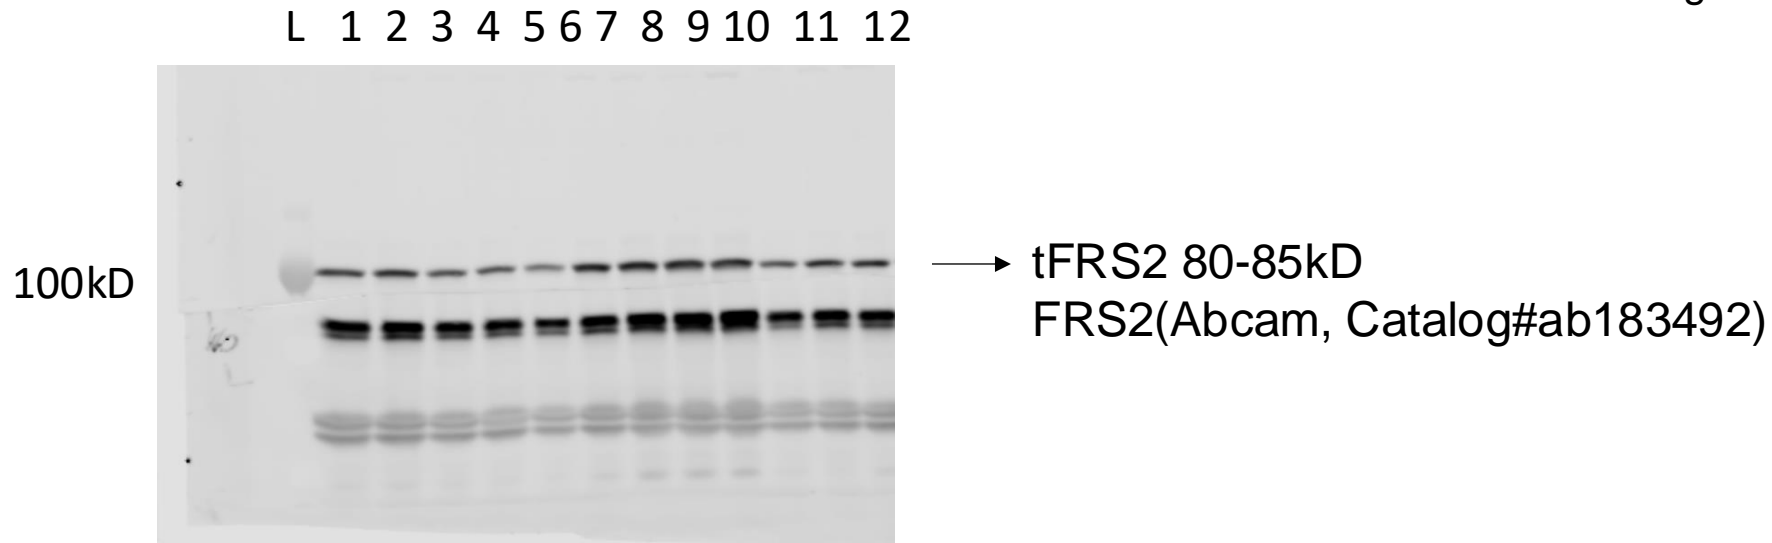

# Full unedited gel for Figure S5E

- 1: ICC13-7 xenograft treated with IgG1 control Rep#1
- 2: ICC13-7 xenograft treated with IgG1 control Rep#2
- 3: ICC13-7 xenograft treated with IgG1 control Rep#3
- 4: ICC13-7 xenograft treated with B 10mg/kg Rep#1
- 5: ICC13-7 xenograft treated with B 10mg/kg Rep#2
- 6: ICC13-7 xenograft treated with B 10mg/kg Rep#3
- 7: ICC13-7 xenograft treated with D 10mg/kg Rep#1
- 8: ICC13-7 xenograft treated with D 10mg/kg Rep#2
- 9: ICC13-7 xenograft treated with D 10mg/kg Rep#3
- 10: ICC13-7 xenograft treated with C 10mg/kg Rep#1
- 11: ICC13-7 xenograft treated with C 10mg/kg Rep#2
- 12: ICC13-7 xenograft treated with C 10mg/kg Rep#3

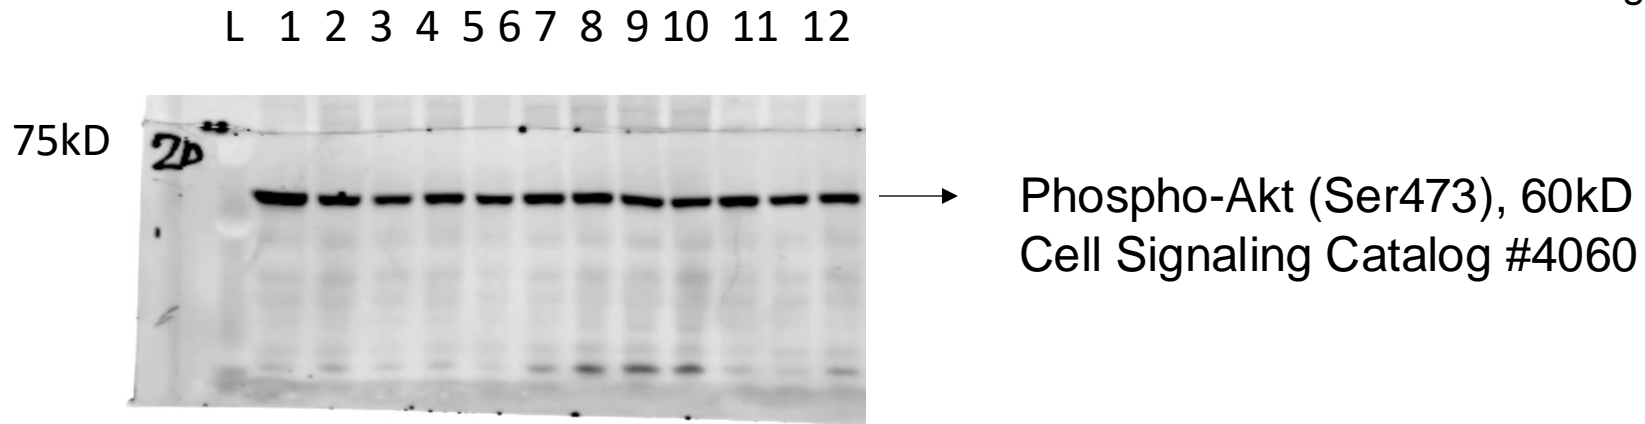

# Full unedited gel for Figure S5E

- 1: ICC13-7 xenograft treated with IgG1 control Rep#1
- 2: ICC13-7 xenograft treated with IgG1 control Rep#2
- 3: ICC13-7 xenograft treated with IgG1 control Rep#3
- 4: ICC13-7 xenograft treated with B 10mg/kg Rep#1
- 5: ICC13-7 xenograft treated with B 10mg/kg Rep#2
- 6: ICC13-7 xenograft treated with B 10mg/kg Rep#3
- 7: ICC13-7 xenograft treated with D 10mg/kg Rep#1
- 8: ICC13-7 xenograft treated with D 10mg/kg Rep#2
- 9: ICC13-7 xenograft treated with D 10mg/kg Rep#3
- 10: ICC13-7 xenograft treated with C 10mg/kg Rep#1
- 11: ICC13-7 xenograft treated with C 10mg/kg Rep#2
- 12: ICC13-7 xenograft treated with C 10mg/kg Rep#3

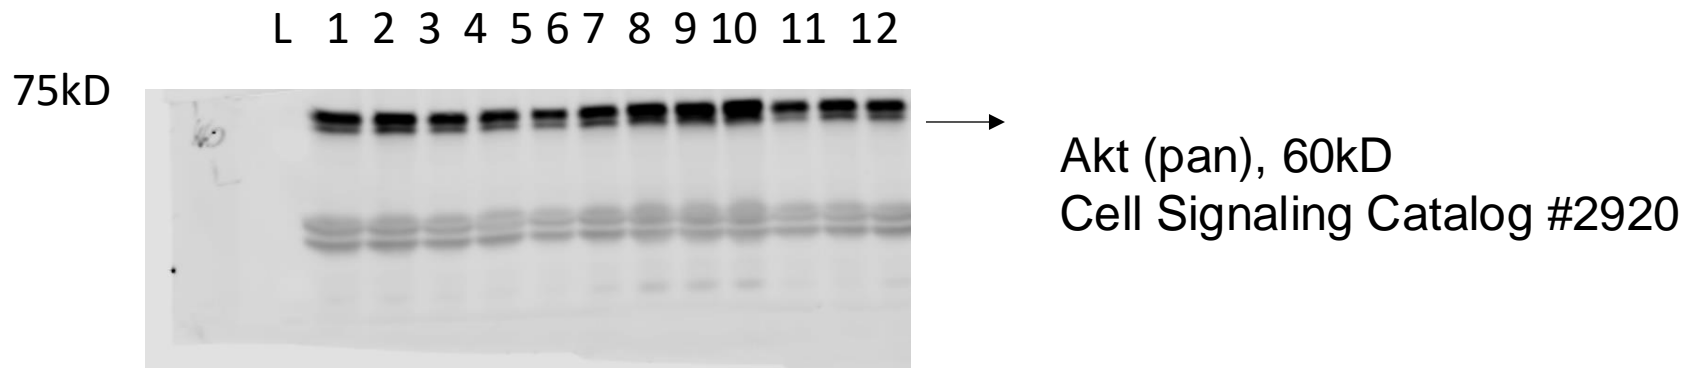

# Full unedited gel for Figure S5E

- 1: ICC13-7 xenograft treated with IgG1 control Rep#1
- 2: ICC13-7 xenograft treated with IgG1 control Rep#2
- 3: ICC13-7 xenograft treated with IgG1 control Rep#3
- 4: ICC13-7 xenograft treated with B 10mg/kg Rep#1
- 5: ICC13-7 xenograft treated with B 10mg/kg Rep#2
- 6: ICC13-7 xenograft treated with B 10mg/kg Rep#3
- 7: ICC13-7 xenograft treated with D 10mg/kg Rep#1
- 8: ICC13-7 xenograft treated with D 10mg/kg Rep#2
- 9: ICC13-7 xenograft treated with D 10mg/kg Rep#3
- 10: ICC13-7 xenograft treated with C 10mg/kg Rep#1
- 11: ICC13-7 xenograft treated with C 10mg/kg Rep#2
- 12: ICC13-7 xenograft treated with C 10mg/kg Rep#3

L 1 2 3 4 5 6 7 8 9 10 11 12

50kD

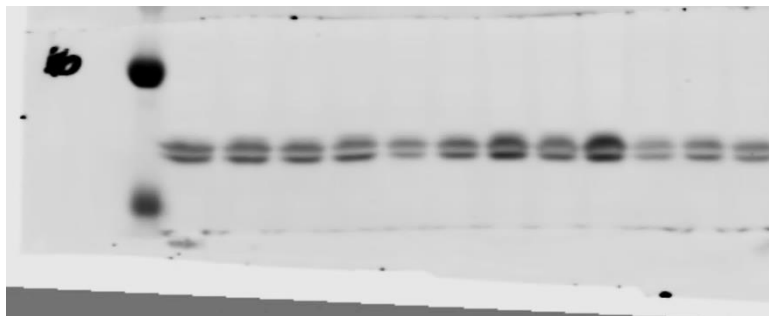

→ Phospho-p44/42 MAPK (Erk1/2) 45kD  
(Thr202/Tyr204)  
Cell Signaling Catalog#9106

# Full unedited gel for Figure S5E

- 1: ICC13-7 xenograft treated with IgG1 control Rep#1
- 2: ICC13-7 xenograft treated with IgG1 control Rep#2
- 3: ICC13-7 xenograft treated with IgG1 control Rep#3
- 4: ICC13-7 xenograft treated with B 10mg/kg Rep#1
- 5: ICC13-7 xenograft treated with B 10mg/kg Rep#2
- 6: ICC13-7 xenograft treated with B 10mg/kg Rep#3
- 7: ICC13-7 xenograft treated with D 10mg/kg Rep#1
- 8: ICC13-7 xenograft treated with D 10mg/kg Rep#2
- 9: ICC13-7 xenograft treated with D 10mg/kg Rep#3
- 10: ICC13-7 xenograft treated with C 10mg/kg Rep#1
- 11: ICC13-7 xenograft treated with C 10mg/kg Rep#2
- 12: ICC13-7 xenograft treated with C 10mg/kg Rep#3

L 1 2 3 4 5 6 7 8 9 10 11 12

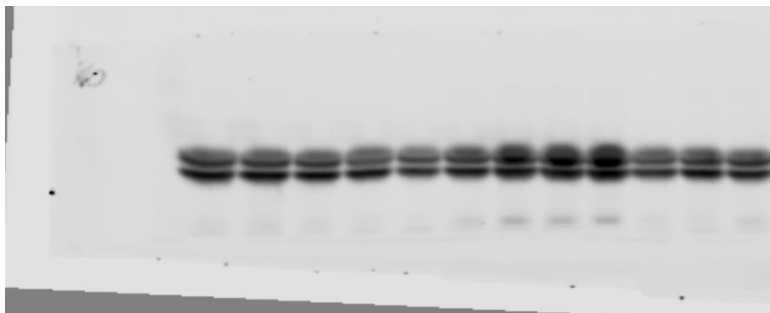

→ p44/42 MAPK (Erk1/2) 42, 44kD  
Cell Signaling Catalog#4695

# Full unedited gel for Figure S5E

- 1: ICC13-7 xenograft treated with IgG1 control Rep#1
- 2: ICC13-7 xenograft treated with IgG1 control Rep#2
- 3: ICC13-7 xenograft treated with IgG1 control Rep#3
- 4: ICC13-7 xenograft treated with B 10mg/kg Rep#1
- 5: ICC13-7 xenograft treated with B 10mg/kg Rep#2
- 6: ICC13-7 xenograft treated with B 10mg/kg Rep#3
- 7: ICC13-7 xenograft treated with D 10mg/kg Rep#1
- 8: ICC13-7 xenograft treated with D 10mg/kg Rep#2
- 9: ICC13-7 xenograft treated with D 10mg/kg Rep#3
- 10: ICC13-7 xenograft treated with C 10mg/kg Rep#1
- 11: ICC13-7 xenograft treated with C 10mg/kg Rep#2
- 12: ICC13-7 xenograft treated with C 10mg/kg Rep#3

L 1 2 3 4 5 6 7 8 9 10 11 12

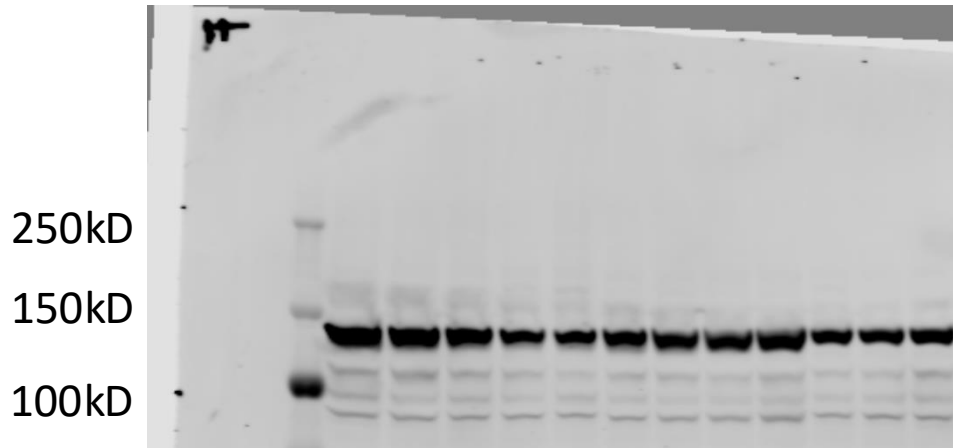

→ Vinculin 116kD  
Abcam (Catalog#V9131)



# Full unedited gel for Figure 6J

- 1: ICC13-7 treated with IgG1 control
- 2: ICC13-7 treated with B/D 1uM
- 3: ICC13-7 treated with B/C 1uM
- 4: ICC13-7 treated with IgG1 control + BafA1
- 5: ICC13-7 treated with B/D 1uM+ BafA1
- 6: ICC13-7 treated with B/C 1uM + BafA1

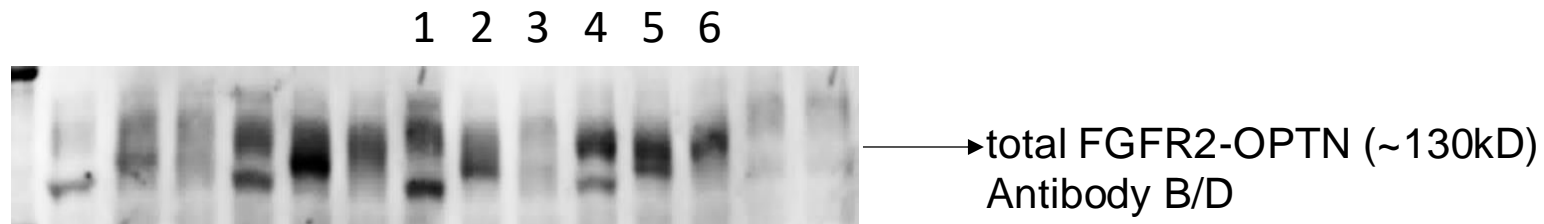

# Full unedited gel for Figure 6J

- 1: ICC13-7 treated with IgG1 control
- 2: ICC13-7 treated with B/D 1uM
- 3: ICC13-7 treated with B/C 1uM
- 4: ICC13-7 treated with IgG1 control + BafA1
- 5: ICC13-7 treated with B/D 1uM+ BafA1
- 6: ICC13-7 treated with B/C 1uM + BafA1

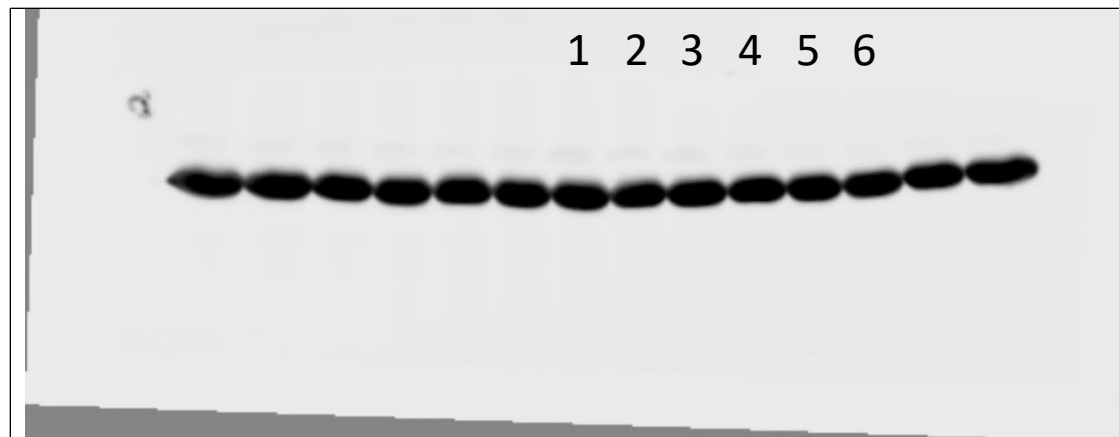

→  $\alpha$ -Tubulin, 52kD  
Cell Signaling Catalog #3873

# Full unedited gel for Figure 7F

- 0: NIH3T3: FGFR2-ACHYL1
- 1: NIH3T3: FGFR2-ACHYL1, V565F treated with IgG1 control
- 2: NIH3T3: FGFR2-ACHYL1, V565F treated with B/D
- 3: NIH3T3: FGFR2-ACHYL1, V565F treated with B/C
- 4: NIH3T3: FGFR2-ACHYL1, V565F treated with IgG1+ FGF10
- 5: NIH3T3: FGFR2-ACHYL1, V565F treated with B/D + FGF10
- 6: NIH3T3: FGFR2-ACHYL1, V565F treated with B/C +FGF10
- 7: NIH3T3: FGFR2-ACHYL1, V565I treated with IgG1 control
- 8: NIH3T3: FGFR2-ACHYL1, V565I treated with B/D
- 9: NIH3T3: FGFR2-ACHYL1, V565I treated with B/C
- 10: NIH3T3: FGFR2-ACHYL1, V565I treated with IgG1+ FGF10
- 11: NIH3T3: FGFR2-ACHYL1, V565I treated with B/D + FGF10
- 12: NIH3T3: FGFR2-ACHYL1, V565I treated with B/C +FGF10

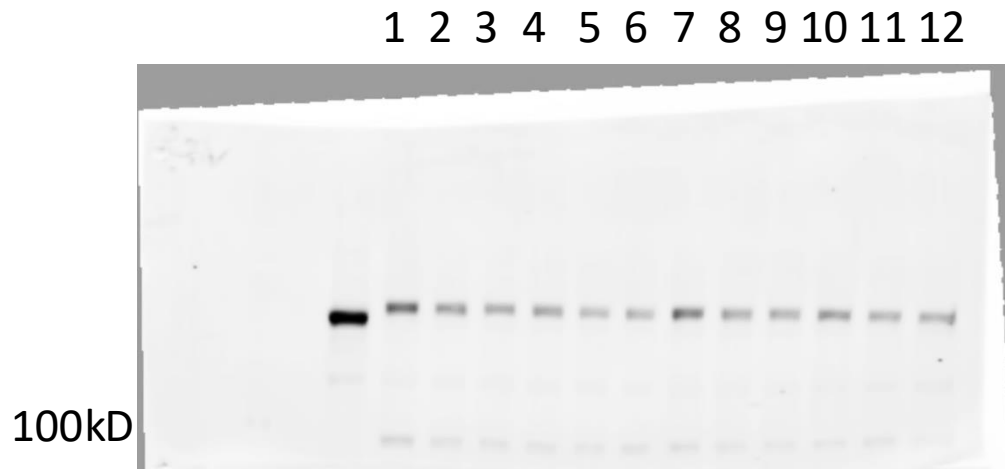

→ pFGFR (120, 145kD)  
pFGFR (Tyr653/654)  
Cell Signaling (Catalog#3471)

# Full unedited gel for Figure 7F

- 0: NIH3T3: FGFR2-ACHYL1
- 1: NIH3T3: FGFR2-ACHYL1, V565F treated with IgG1 control
- 2: NIH3T3: FGFR2-ACHYL1, V565F treated with B/D
- 3: NIH3T3: FGFR2-ACHYL1, V565F treated with B/C
- 4: NIH3T3: FGFR2-ACHYL1, V565F treated with IgG1+ FGF10
- 5: NIH3T3: FGFR2-ACHYL1, V565F treated with B/D + FGF10
- 6: NIH3T3: FGFR2-ACHYL1, V565F treated with B/C +FGF10
- 7: NIH3T3: FGFR2-ACHYL1, V565I treated with IgG1 control
- 8: NIH3T3: FGFR2-ACHYL1, V565I treated with B/D
- 9: NIH3T3: FGFR2-ACHYL1, V565I treated with B/C
- 10: NIH3T3: FGFR2-ACHYL1, V565I treated with IgG1+ FGF10
- 11: NIH3T3: FGFR2-ACHYL1, V565I treated with B/D + FGF10
- 12: NIH3T3: FGFR2-ACHYL1, V565I treated with B/C +FGF10

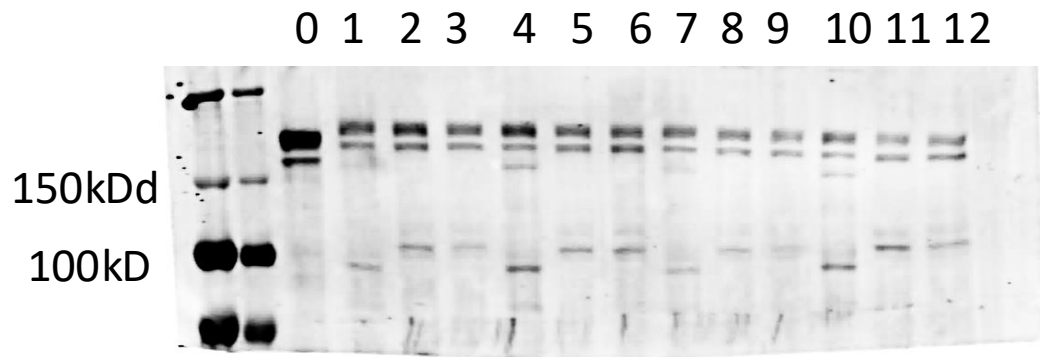

→ total FGFR2 (~130kD)  
Antibody B/D

# Full unedited gel for Figure 7F

- 0: NIH3T3 parental
- 1: NIH3T3: FGFR2-ACHYL1, V565F treated with IgG1 control
- 2: NIH3T3: FGFR2-ACHYL1, V565F treated with B/D
- 3: NIH3T3: FGFR2-ACHYL1, V565F treated with B/C
- 4: NIH3T3: FGFR2-ACHYL1, V565F treated with IgG1+ FGF10
- 5: NIH3T3: FGFR2-ACHYL1, V565F treated with B/D + FGF10
- 6: NIH3T3: FGFR2-ACHYL1, V565F treated with B/C +FGF10
- 7: NIH3T3: FGFR2-ACHYL1, V565I treated with IgG1 control
- 8: NIH3T3: FGFR2-ACHYL1, V565I treated with B/D
- 9: NIH3T3: FGFR2-ACHYL1, V565I treated with B/C
- 10: NIH3T3: FGFR2-ACHYL1, V565I treated with IgG1+ FGF10
- 11: NIH3T3: FGFR2-ACHYL1, V565I treated with B/D + FGF10
- 12: NIH3T3: FGFR2-ACHYL1, V565I treated with B/C +FGF10

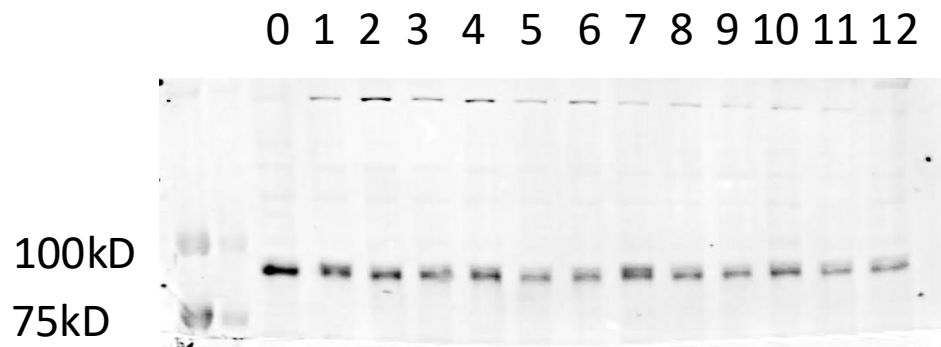

→ pFRS2 80-85kD  
pFRS2(Y436)  
Cell Signaling (Catalog#3861)

# Full unedited gel for Figure 7F

- 0: NIH3T3 parental
- 1: NIH3T3: FGFR2-ACHYL1, V565F treated with IgG1 control
- 2: NIH3T3: FGFR2-ACHYL1, V565F treated with B/D
- 3: NIH3T3: FGFR2-ACHYL1, V565F treated with B/C
- 4: NIH3T3: FGFR2-ACHYL1, V565F treated with IgG1+ FGF10
- 5: NIH3T3: FGFR2-ACHYL1, V565F treated with B/D + FGF10
- 6: NIH3T3: FGFR2-ACHYL1, V565F treated with B/C +FGF10
- 7: NIH3T3: FGFR2-ACHYL1, V565I treated with IgG1 control
- 8: NIH3T3: FGFR2-ACHYL1, V565I treated with B/D
- 9: NIH3T3: FGFR2-ACHYL1, V565I treated with B/C
- 10: NIH3T3: FGFR2-ACHYL1, V565I treated with IgG1+ FGF10
- 11: NIH3T3: FGFR2-ACHYL1, V565I treated with B/D + FGF10
- 12: NIH3T3: FGFR2-ACHYL1, V565I treated with B/C +FGF10

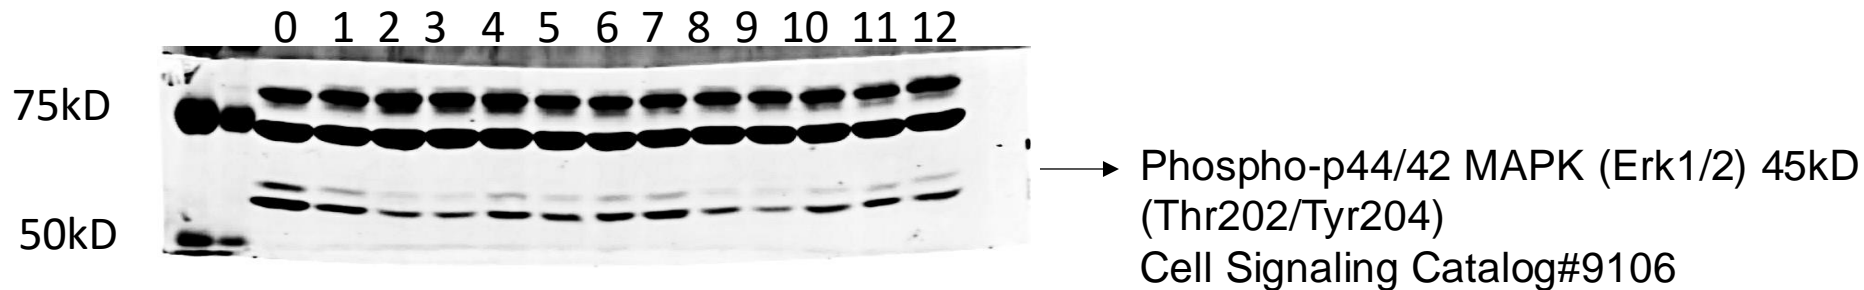

# Full unedited gel for Figure 7F

- 0: NIH3T3 parental
- 1: NIH3T3: FGFR2-ACHYL1, V565F treated with IgG1 control
- 2: NIH3T3: FGFR2-ACHYL1, V565F treated with B/D
- 3: NIH3T3: FGFR2-ACHYL1, V565F treated with B/C
- 4: NIH3T3: FGFR2-ACHYL1, V565F treated with IgG1+ FGF10
- 5: NIH3T3: FGFR2-ACHYL1, V565F treated with B/D + FGF10
- 6: NIH3T3: FGFR2-ACHYL1, V565F treated with B/C +FGF10
- 7: NIH3T3: FGFR2-ACHYL1, V565I treated with IgG1 control
- 8: NIH3T3: FGFR2-ACHYL1, V565I treated with B/D
- 9: NIH3T3: FGFR2-ACHYL1, V565I treated with B/C
- 10: NIH3T3: FGFR2-ACHYL1, V565I treated with IgG1+ FGF10
- 11: NIH3T3: FGFR2-ACHYL1, V565I treated with B/D + FGF10
- 12: NIH3T3: FGFR2-ACHYL1, V565I treated with B/C +FGF10

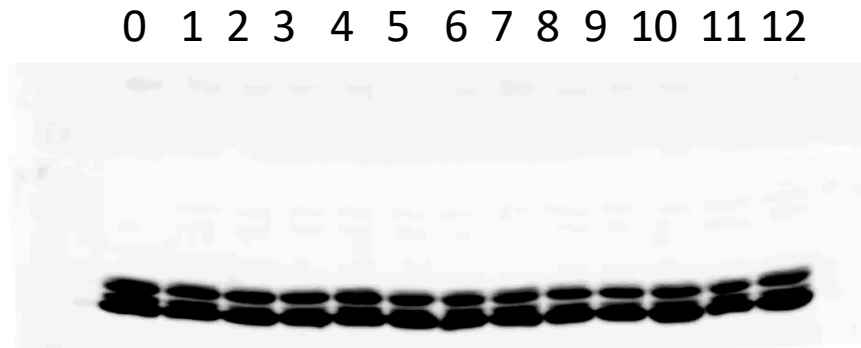

→ p44/42 MAPK (Erk1/2) 42, 44kD  
Cell Signaling Catalog#4695

# Full unedited gel for Figure 7F

- 0: NIH3T3 parental
- 1: NIH3T3: FGFR2-ACHYL1, V565F treated with IgG1 control
- 2: NIH3T3: FGFR2-ACHYL1, V565F treated with B/D
- 3: NIH3T3: FGFR2-ACHYL1, V565F treated with B/C
- 4: NIH3T3: FGFR2-ACHYL1, V565F treated with IgG1+ FGF10
- 5: NIH3T3: FGFR2-ACHYL1, V565F treated with B/D + FGF10
- 6: NIH3T3: FGFR2-ACHYL1, V565F treated with B/C +FGF10
- 7: NIH3T3: FGFR2-ACHYL1, V565I treated with IgG1 control
- 8: NIH3T3: FGFR2-ACHYL1, V565I treated with B/D
- 9: NIH3T3: FGFR2-ACHYL1, V565I treated with B/C
- 10: NIH3T3: FGFR2-ACHYL1, V565I treated with IgG1+ FGF10
- 11: NIH3T3: FGFR2-ACHYL1, V565I treated with B/D + FGF10
- 12: NIH3T3: FGFR2-ACHYL1, V565I treated with B/C +FGF10

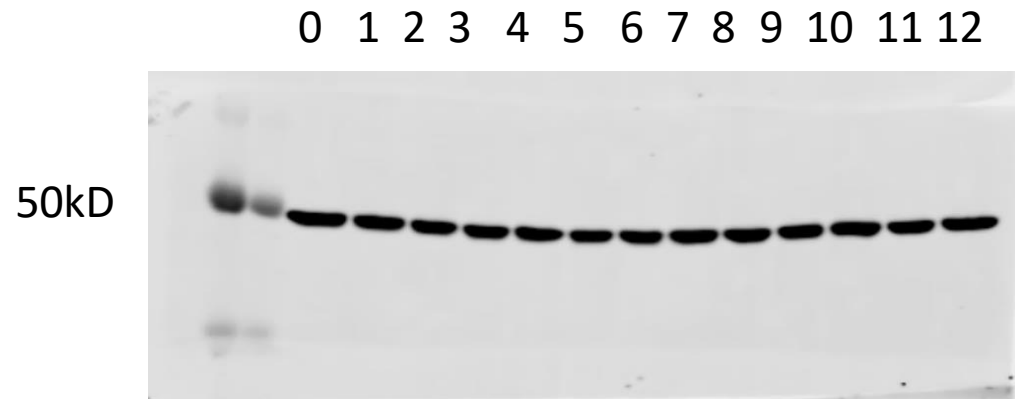

→  $\alpha$ -Tubulin, 52kD  
Cell Signaling Catalog #3873



# Full unedited gel for Figure 7J

- 1: CCLP1 parental non treated
- 2: CCLP1 parental treated with BGJ398
- 3: CCLP1: FGFR2-PHGDH (V565F) treated with IgG1 con
- 4: CCLP1: FGFR2-PHGDH (V565F) treated with BGJ398
- 5: CCLP1: FGFR2-PHGDH (V565F) treated with B/D+BGJ
- 6: CCLP1: FGFR2-PHGDH (V565F) treated with B/C+BGJ
- 7: CCLP1: FGFR2-PHGDH (V565F) treated with B/D
- 8: CCLP1: FGFR2-PHGDH (V565F) treated with B/C

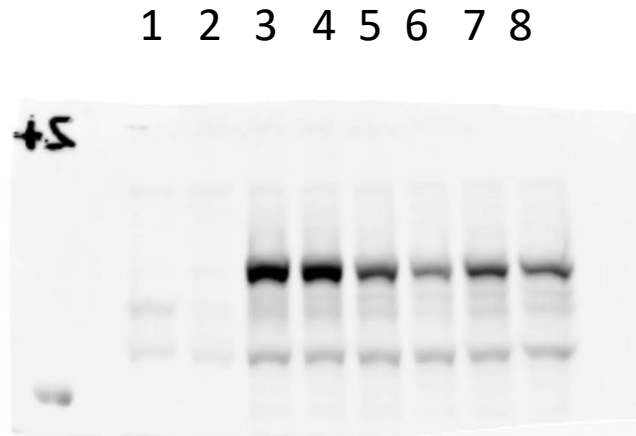

→ pFGFR (120, 145kD)  
pFGFR (Tyr653/654)  
Cell Signaling (Catalog#3471)

# Full unedited gel for Figure 7J

- 1: CCLP1 parental non treated
- 2: CCLP1 parental treated with BGJ398
- 3: CCLP1: FGFR2-PHGDH (V565F) treated with IgG1 con
- 4: CCLP1: FGFR2-PHGDH (V565F) treated with BGJ398
- 5: CCLP1: FGFR2-PHGDH (V565F) treated with B/D+BGJ
- 6: CCLP1: FGFR2-PHGDH (V565F) treated with B/C+BGJ
- 7: CCLP1: FGFR2-PHGDH (V565F) treated with B/D
- 8: CCLP1: FGFR2-PHGDH (V565F) treated with B/C

1 2 3 4 5 6 7 8

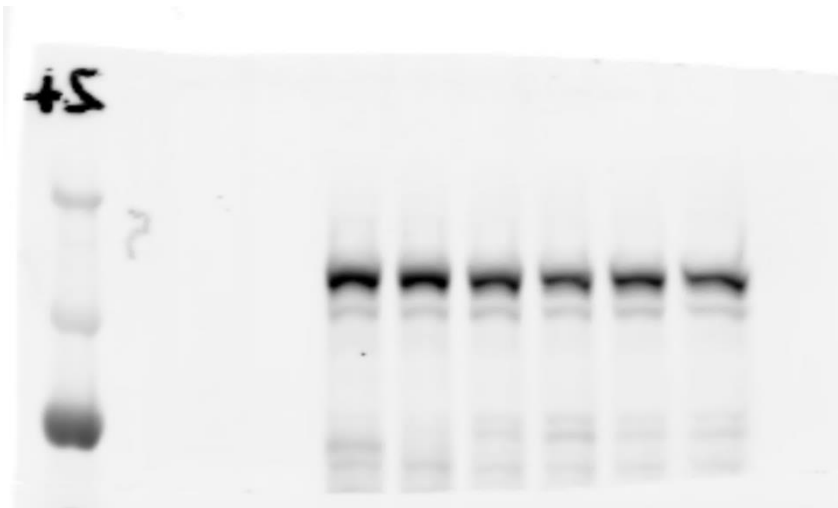

→ total FGFR2 (~130kD)  
Antibody B/D

# Full unedited gel for Figure 7J

- 1: CCLP1 parental non treated
- 2: CCLP1 parental treated with BGJ398
- 3: CCLP1: FGFR2-PHGDH (V565F) treated with IgG1 con
- 4: CCLP1: FGFR2-PHGDH (V565F) treated with BGJ398
- 5: CCLP1: FGFR2-PHGDH (V565F) treated with B/D+BGJ
- 6: CCLP1: FGFR2-PHGDH (V565F) treated with B/C+BGJ
- 7: CCLP1: FGFR2-PHGDH (V565F) treated with B/D
- 8: CCLP1: FGFR2-PHGDH (V565F) treated with B/C

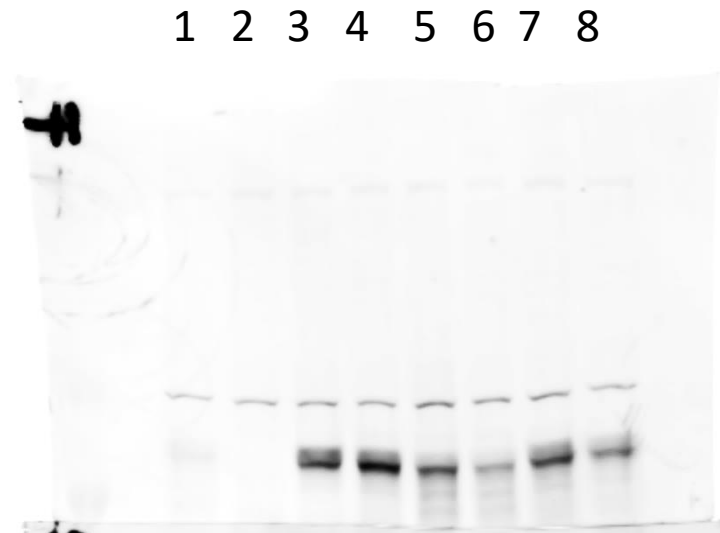

→ pFRS2 80-85kD  
pFRS2(Y436)  
Cell Signaling (Catalog#3861)

# Full unedited gel for Figure 7J

- 1: CCLP1 parental non treated
- 2: CCLP1 parental treated with BGJ398
- 3: CCLP1: FGFR2-PHGDH (V565F) treated with IgG1 con
- 4: CCLP1: FGFR2-PHGDH (V565F) treated with BGJ398
- 5: CCLP1: FGFR2-PHGDH (V565F) treated with B/D+BGJ
- 6: CCLP1: FGFR2-PHGDH (V565F) treated with B/C+BGJ
- 7: CCLP1: FGFR2-PHGDH (V565F) treated with B/D
- 8: CCLP1: FGFR2-PHGDH (V565F) treated with B/C

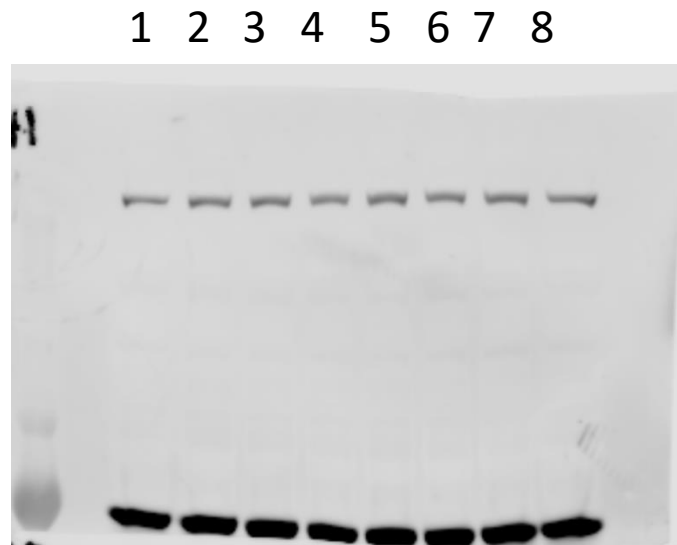

→ tFRS2 80-85kD  
FRS2(Abcam, Catalog#ab183492)

# Full unedited gel for Figure 7J

- 1: CCLP1 parental non treated
- 2: CCLP1 parental treated with BGJ398
- 3: CCLP1: FGFR2-PHGDH (V565F) treated with IgG1 con
- 4: CCLP1: FGFR2-PHGDH (V565F) treated with BGJ398
- 5: CCLP1: FGFR2-PHGDH (V565F) treated with B/D+BGJ
- 6: CCLP1: FGFR2-PHGDH (V565F) treated with B/C+BGJ
- 7: CCLP1: FGFR2-PHGDH (V565F) treated with B/D
- 8: CCLP1: FGFR2-PHGDH (V565F) treated with B/C

1 2 3 4 5 6 7 8

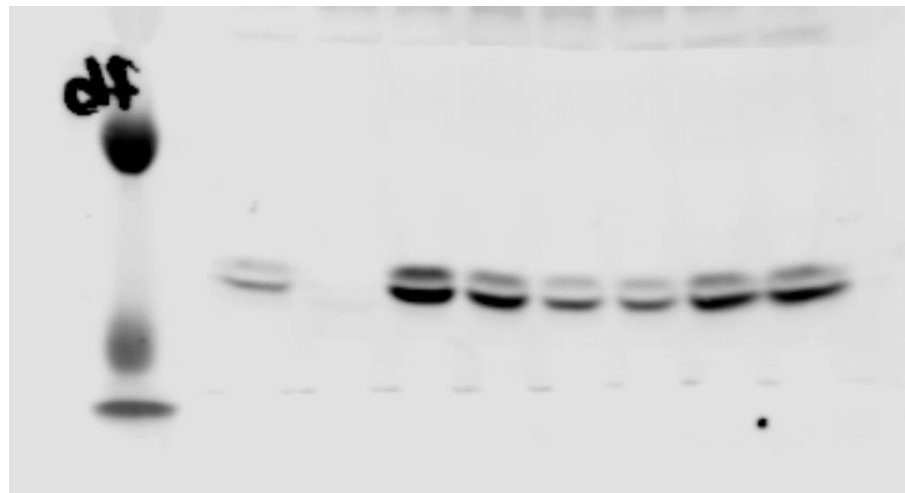

→ Phospho-p44/42 MAPK (Erk1/2) 45kD  
(Thr202/Tyr204)  
Cell Signaling Catalog#9106

# Full unedited gel for Figure 7J

- 1: CCLP1 parental non treated
- 2: CCLP1 parental treated with BGJ398
- 3: CCLP1: FGFR2-PHGDH (V565F) treated with IgG1 con
- 4: CCLP1: FGFR2-PHGDH (V565F) treated with BGJ398
- 5: CCLP1: FGFR2-PHGDH (V565F) treated with B/D+BGJ
- 6: CCLP1: FGFR2-PHGDH (V565F) treated with B/C+BGJ
- 7: CCLP1: FGFR2-PHGDH (V565F) treated with B/D
- 8: CCLP1: FGFR2-PHGDH (V565F) treated with B/C

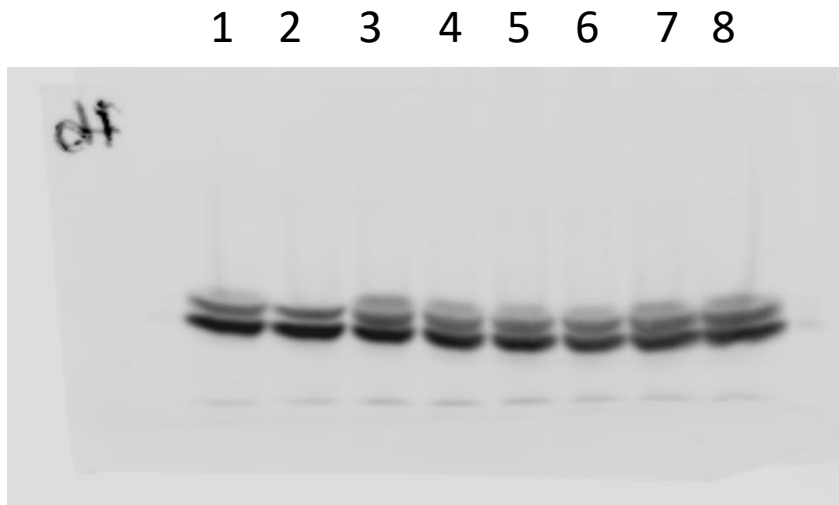

→ p44/42 MAPK (Erk1/2) 42, 44kD  
Cell Signaling Catalog#4695

# Full unedited gel for Figure 7J

- 1: CCLP1 parental non treated
- 2: CCLP1 parental treated with BGJ398
- 3: CCLP1: FGFR2-PHGDH (V565F) treated with IgG1 con
- 4: CCLP1: FGFR2-PHGDH (V565F) treated with BGJ398
- 5: CCLP1: FGFR2-PHGDH (V565F) treated with B/D+BGJ
- 6: CCLP1: FGFR2-PHGDH (V565F) treated with B/C+BGJ
- 7: CCLP1: FGFR2-PHGDH (V565F) treated with B/D
- 8: CCLP1: FGFR2-PHGDH (V565F) treated with B/C

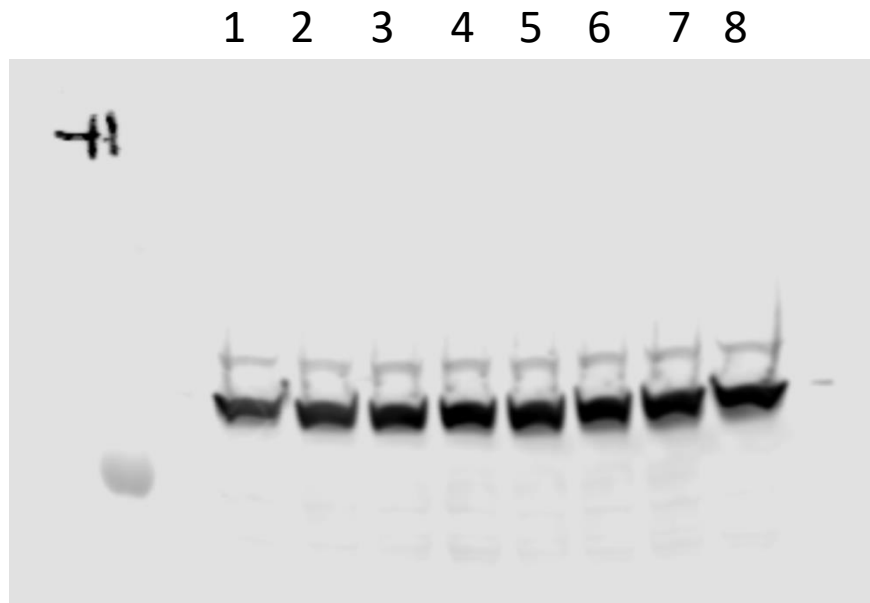

→ Vinculin 116kD  
Abcam (Catalog#V9131)

# Full unedited gel for Figure 7M

- 1: NIH3T3 parental
- 2: NIH3T3: FGFR2 (H167\_N173Del) treated with IgG1 con
- 3: NIH3T3: FGFR2 (H167\_N173Del) treated with B/D
- 4: NIH3T3: FGFR2 (H167\_N173Del) treated with B/C
- 5: NIH3T3: FGFR2 (H167\_N173Del) treated with B
- 6: NIH3T3: FGFR2 (H167\_N173Del) treated with D
- 7: NIH3T3: FGFR2 (H167\_N173Del) treated with C

1 2 3 4 5 6 7

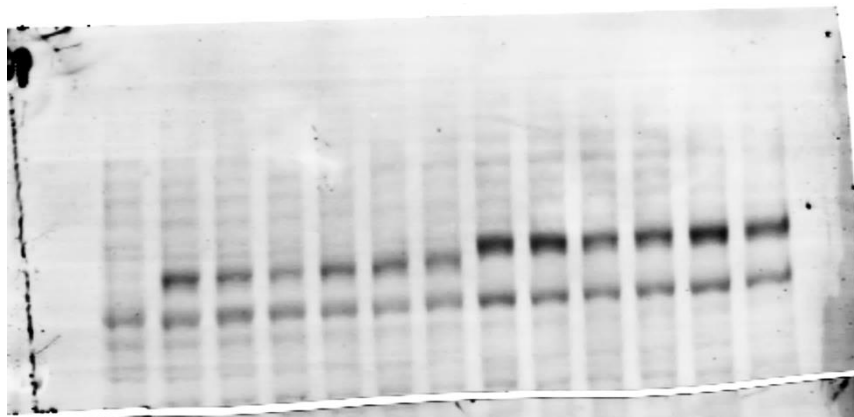

→ pFGFR (120, 145kD)  
pFGFR (Tyr653/654)  
Cell Signaling (Catalog#3471)



# Full unedited gel for Figure 7M

- 1: NIH3T3 parental
- 2: NIH3T3: FGFR2 (H167\_N173Del) treated with IgG1 con
- 3: NIH3T3: FGFR2 (H167\_N173Del) treated with B/D
- 4: NIH3T3: FGFR2 (H167\_N173Del) treated with B/C
- 5: NIH3T3: FGFR2 (H167\_N173Del) treated with B
- 6: NIH3T3: FGFR2 (H167\_N173Del) treated with D
- 7: NIH3T3: FGFR2 (H167\_N173Del) treated with C

1 2 3 4 5 6 7

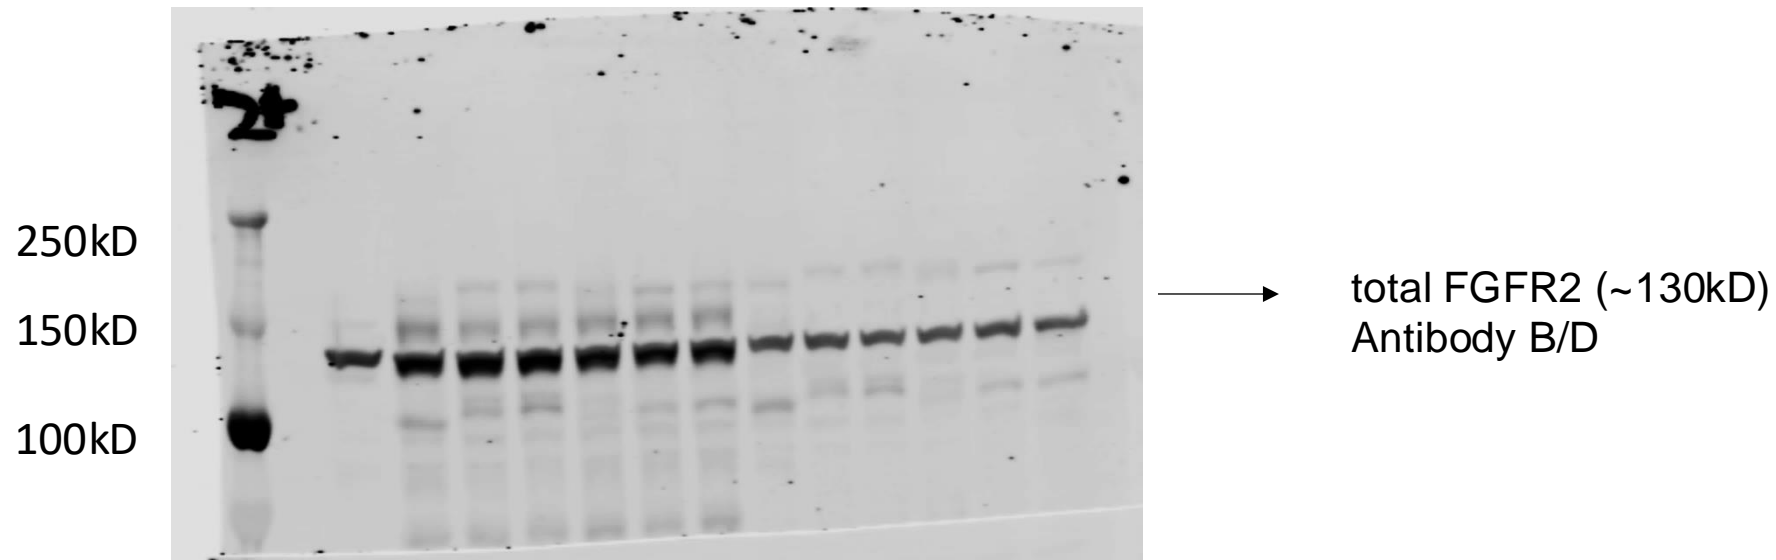

# Full unedited gel for Figure 7M

- 1: NIH3T3 parental
- 2: NIH3T3: FGFR2 (H167\_N173Del) treated with IgG1 con
- 3: NIH3T3: FGFR2 (H167\_N173Del) treated with B/D
- 4: NIH3T3: FGFR2 (H167\_N173Del) treated with B/C
- 5: NIH3T3: FGFR2 (H167\_N173Del) treated with B
- 6: NIH3T3: FGFR2 (H167\_N173Del) treated with D
- 7: NIH3T3: FGFR2 (H167\_N173Del) treated with C

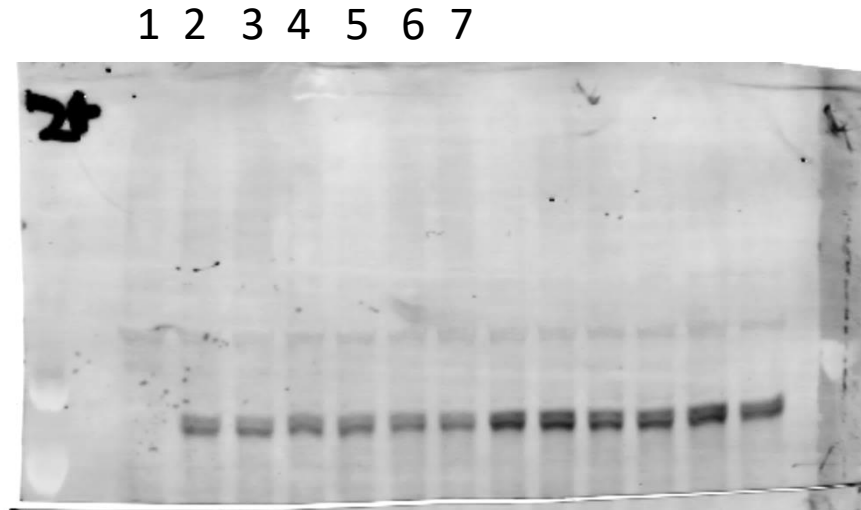

→ pFRS2 80-85kD  
pFRS2(Y436)  
Cell Signaling (Catalog#3861)

# Full unedited gel for Figure 7M

- 1: NIH3T3 parental
- 2: NIH3T3: FGFR2 (H167\_N173Del) treated with IgG1 con
- 3: NIH3T3: FGFR2 (H167\_N173Del) treated with B/D
- 4: NIH3T3: FGFR2 (H167\_N173Del) treated with B/C
- 5: NIH3T3: FGFR2 (H167\_N173Del) treated with B
- 6: NIH3T3: FGFR2 (H167\_N173Del) treated with D
- 7: NIH3T3: FGFR2 (H167\_N173Del) treated with C

1 2 3 4 5 6 7

75kD

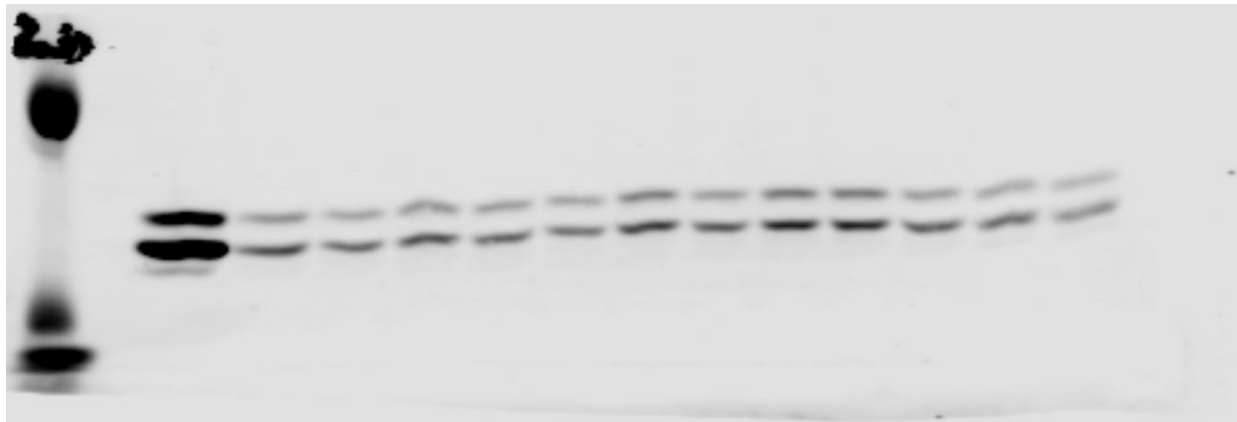

→ Phospho-p44/42 MAPK (Erk1/2) 45kD  
(Thr202/Tyr204)  
Cell Signaling Catalog#9106

# Full unedited gel for Figure 7M

- 1: NIH3T3 parental
- 2: NIH3T3: FGFR2 (H167\_N173Del) treated with IgG1 con
- 3: NIH3T3: FGFR2 (H167\_N173Del) treated with B/D
- 4: NIH3T3: FGFR2 (H167\_N173Del) treated with B/C
- 5: NIH3T3: FGFR2 (H167\_N173Del) treated with B
- 6: NIH3T3: FGFR2 (H167\_N173Del) treated with D
- 7: NIH3T3: FGFR2 (H167\_N173Del) treated with C

1 2 3 4 5 6 7

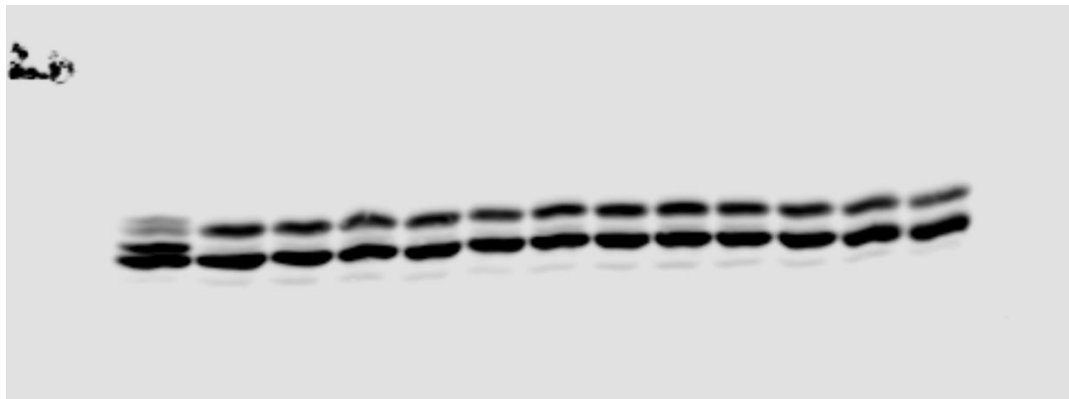

→ p44/42 MAPK (Erk1/2) 42, 44kD  
Cell Signaling Catalog#4695

# Full unedited gel for Figure 7M

- 1: NIH3T3 parental
- 2: NIH3T3: FGFR2 (H167\_N173Del) treated with IgG1 con
- 3: NIH3T3: FGFR2 (H167\_N173Del) treated with B/D
- 4: NIH3T3: FGFR2 (H167\_N173Del) treated with B/C
- 5: NIH3T3: FGFR2 (H167\_N173Del) treated with B
- 6: NIH3T3: FGFR2 (H167\_N173Del) treated with D
- 7: NIH3T3: FGFR2 (H167\_N173Del) treated with C

1 2 3 4 5 6 7

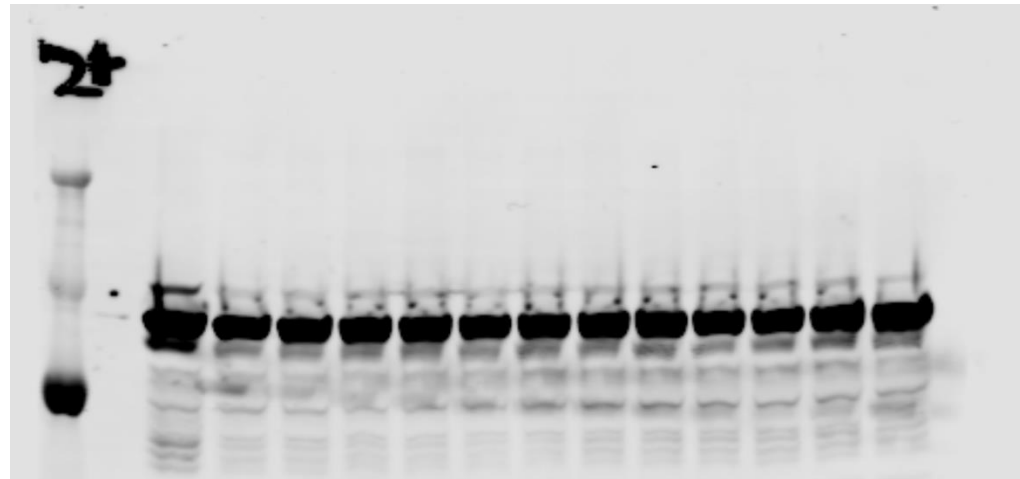

→ Vinculin 116kD  
Abcam (Catalog#V9131)

# Full unedited gel for Figure S7C

- 1: CCLP1 parental
- 2: CCLP1: FGFR2-PHGDH
- 3: CCLP1: FGFR2-PGHDH (V565F)

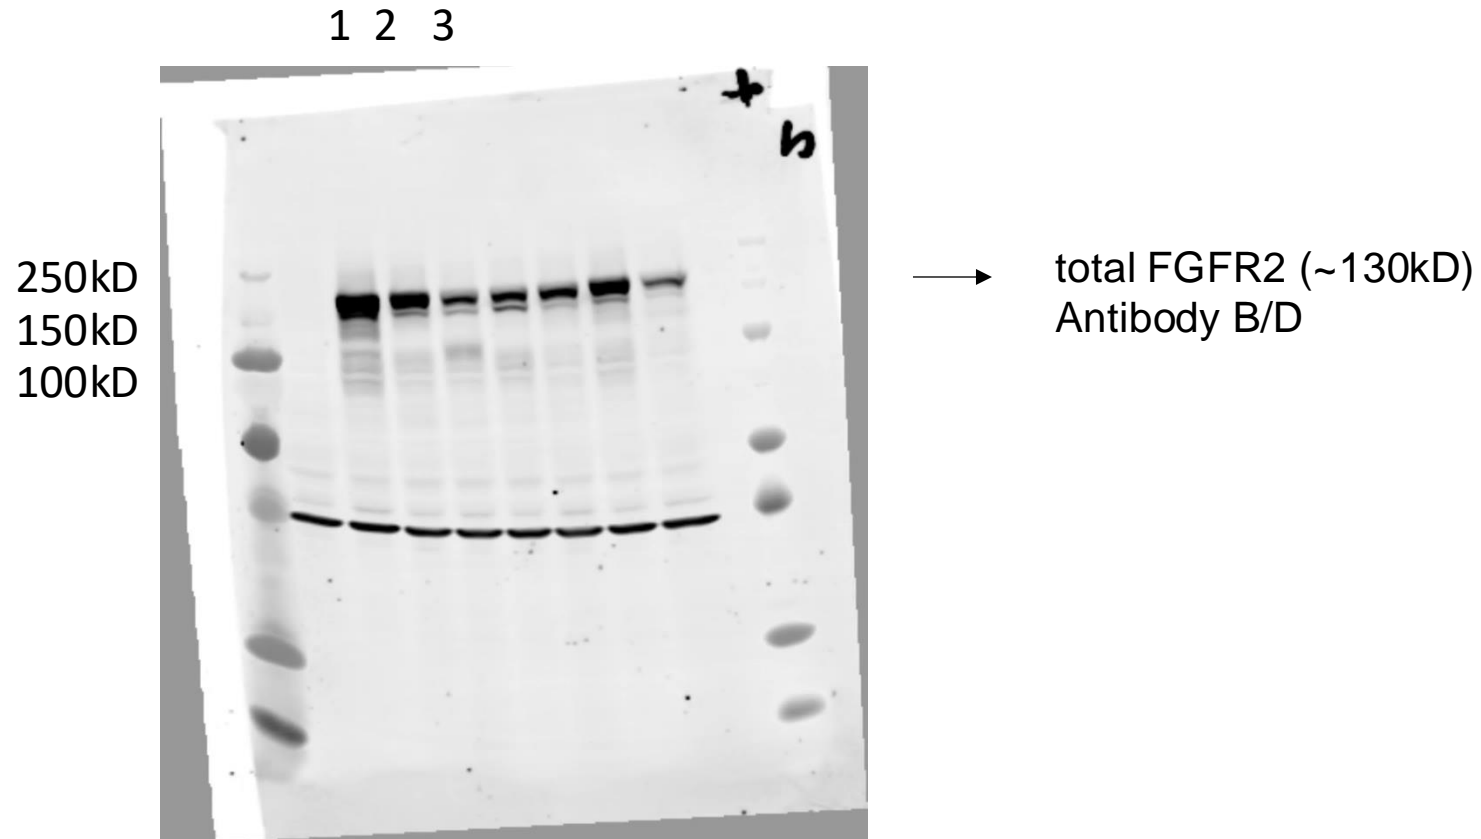

# Full unedited gel for Figure S7C

- 1: CCLP1 parental
- 2: CCLP1: FGFR2-PHGDH
- 3: CCLP1: FGFR2-PGHDH (V565F)

1 2 3

250kD  
150kD  
100kD

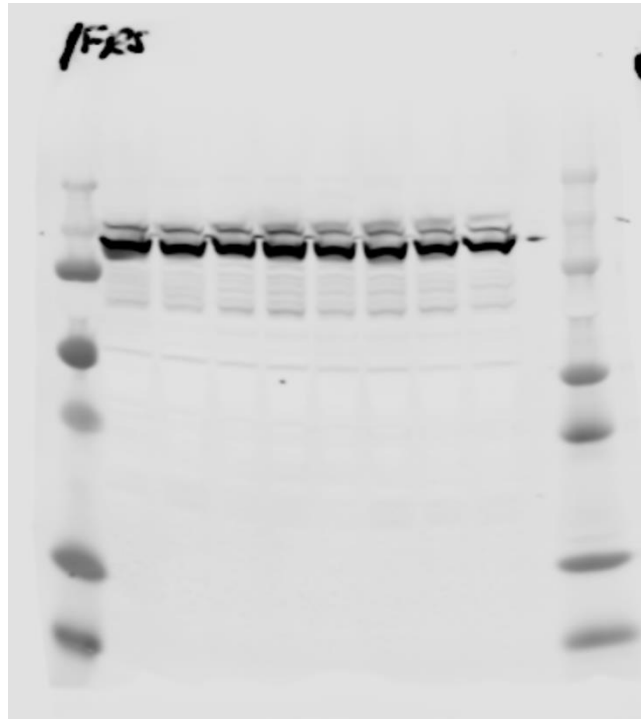

→ Vinculin 116kD  
Abcam (Catalog#V9131)

# Full unedited gel for Figure S7G

- 1: NIH3T3 parental
- 2: NIH3T3: FGFR2 WT
- 3: NIH3T3: FGFR2 with mutation as Patient 1
- 4: NIH3T3: FGFR2 with mutation as Patient 2
- 5: NIH3T3: FGFR2 with mutation as Patient 3
- 6: NIH3T3: FGFR2 with mutation as Patient 4

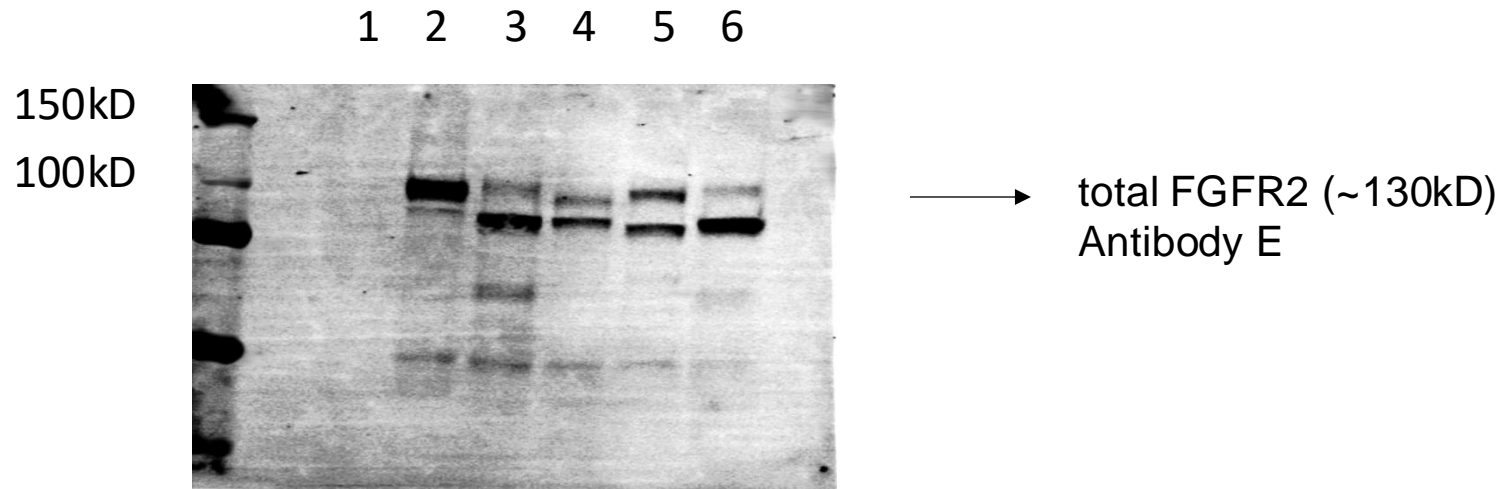



# Full unedited gel for Figure S7G

- 1: NIH3T3 parental
- 2: NIH3T3: FGFR2 WT
- 3: NIH3T3: FGFR2 with mutation as Patient 1
- 4: NIH3T3: FGFR2 with mutation as Patient 2
- 5: NIH3T3: FGFR2 with mutation as Patient 3
- 6: NIH3T3: FGFR2 with mutation as Patient 4

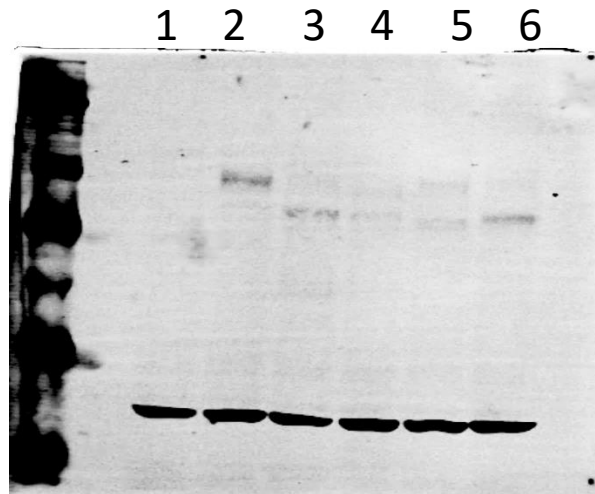

→  $\alpha$ -Tubulin, 52kD  
Cell Signaling Catalog #3873

# Full unedited gel for Figure S7L

- 1: NIH3T3: FGFR2 with mutation as Patient 1
- 2: NIH3T3: FGFR2 with mutation as Patient 1 + BGJ398 (Infigratinib)
- 3: NIH3T3: FGFR2 with mutation as Patient 2
- 4: NIH3T3: FGFR2 with mutation as Patient 2 + BGJ398 (Infigratinib)
- 5: NIH3T3: FGFR2 with mutation as Patient 3
- 6: NIH3T3: FGFR2 with mutation as Patient 3 + BGJ398 (Infigratinib)
- 7: NIH3T3: FGFR2 with mutation as Patient 4
- 8: NIH3T3: FGFR2 with mutation as Patient 4 + BGJ398 (Infigratinib)

1 2 3 4 5 6 7 8

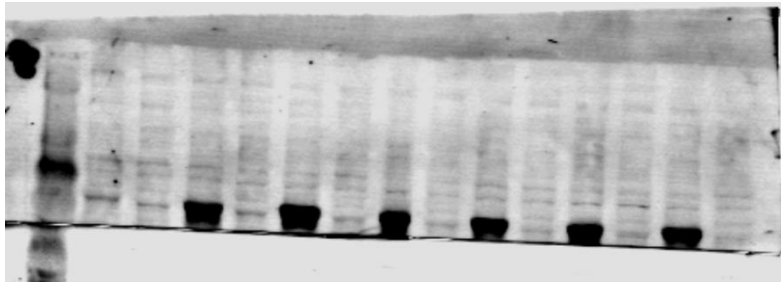

—▶ pFRS2 80-85kD  
pFRS2(Y436)  
Cell Signaling (Catalog#3861)

# Full unedited gel for Figure S7L

- 1: NIH3T3: FGFR2 with mutation as Patient 1
- 2: NIH3T3: FGFR2 with mutation as Patient 1 + BGJ398 (Infigratinib)
- 3: NIH3T3: FGFR2 with mutation as Patient 2
- 4: NIH3T3: FGFR2 with mutation as Patient 2 + BGJ398 (Infigratinib)
- 5: NIH3T3: FGFR2 with mutation as Patient 3
- 6: NIH3T3: FGFR2 with mutation as Patient 3 + BGJ398 (Infigratinib)
- 7: NIH3T3: FGFR2 with mutation as Patient 4
- 8: NIH3T3: FGFR2 with mutation as Patient 4 + BGJ398 (Infigratinib)

1 2 3 4 5 6 7 8

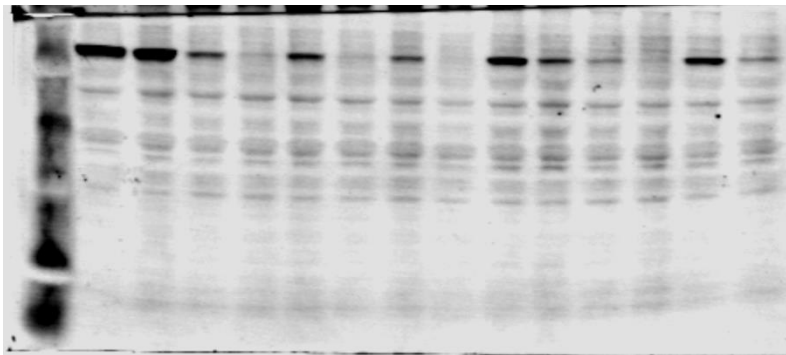

→ Phospho-Akt (Ser473), 60kD  
Cell Signaling Catalog #4060

# Full unedited gel for Figure S7L

- 1: NIH3T3: FGFR2 with mutation as Patient 1
- 2: NIH3T3: FGFR2 with mutation as Patient 1 + BGJ398 (Infigratinib)
- 3: NIH3T3: FGFR2 with mutation as Patient 2
- 4: NIH3T3: FGFR2 with mutation as Patient 2 + BGJ398 (Infigratinib)
- 5: NIH3T3: FGFR2 with mutation as Patient 3
- 6: NIH3T3: FGFR2 with mutation as Patient 3 + BGJ398 (Infigratinib)
- 7: NIH3T3: FGFR2 with mutation as Patient 4
- 8: NIH3T3: FGFR2 with mutation as Patient 4 + BGJ398 (Infigratinib)

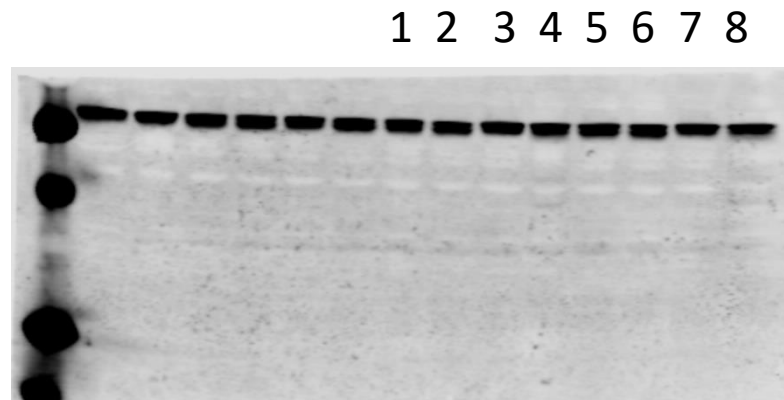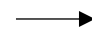

Akt (pan), 60kD  
Cell Signaling Catalog #2920

# Full unedited gel for Figure S7L

- 1: NIH3T3: FGFR2 with mutation as Patient 1
- 2: NIH3T3: FGFR2 with mutation as Patient 1 + BGJ398 (Infigratinib)
- 3: NIH3T3: FGFR2 with mutation as Patient 2
- 4: NIH3T3: FGFR2 with mutation as Patient 2 + BGJ398 (Infigratinib)
- 5: NIH3T3: FGFR2 with mutation as Patient 3
- 6: NIH3T3: FGFR2 with mutation as Patient 3 + BGJ398 (Infigratinib)
- 7: NIH3T3: FGFR2 with mutation as Patient 4
- 8: NIH3T3: FGFR2 with mutation as Patient 4 + BGJ398 (Infigratinib)

1 2 3 4 5 6 7 8

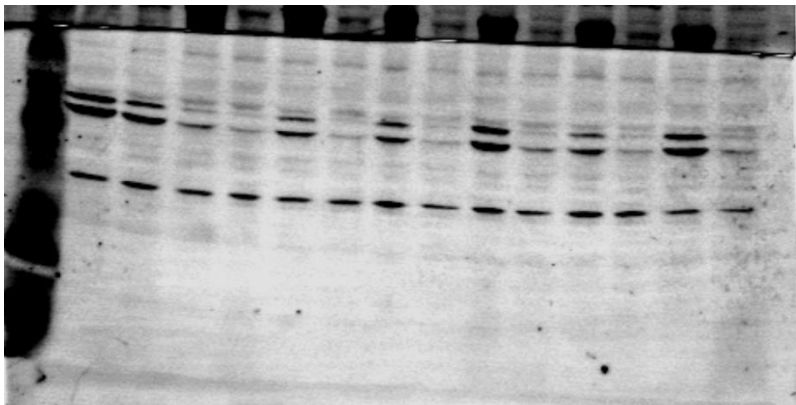

→ Phospho-p44/42 MAPK (Erk1/2) 45kD  
(Thr202/Tyr204)  
Cell Signaling Catalog#9106

# Full unedited gel for Figure S7L

- 1: NIH3T3: FGFR2 with mutation as Patient 1
- 2: NIH3T3: FGFR2 with mutation as Patient 1 + BGJ398 (Infigratinib)
- 3: NIH3T3: FGFR2 with mutation as Patient 2
- 4: NIH3T3: FGFR2 with mutation as Patient 2 + BGJ398 (Infigratinib)
- 5: NIH3T3: FGFR2 with mutation as Patient 3
- 6: NIH3T3: FGFR2 with mutation as Patient 3 + BGJ398 (Infigratinib)
- 7: NIH3T3: FGFR2 with mutation as Patient 4
- 8: NIH3T3: FGFR2 with mutation as Patient 4 + BGJ398 (Infigratinib)

1 2 3 4 5 6 7 8

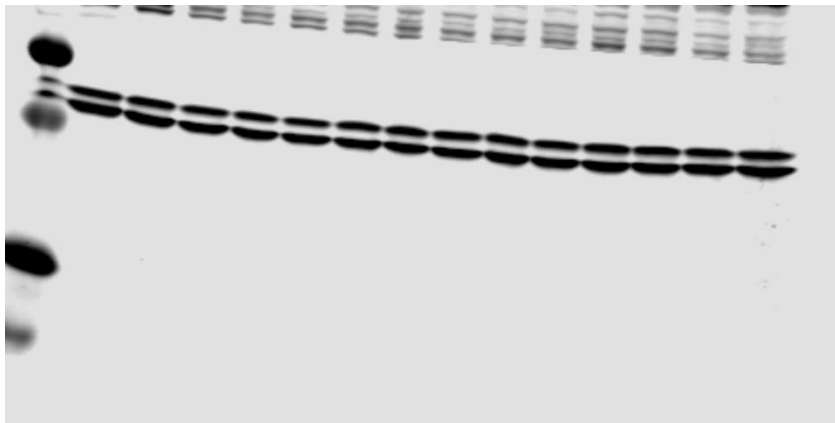

→ p44/42 MAPK (Erk1/2) 42, 44kD  
Cell Signaling Catalog#4695

# Full unedited gel for Figure S7L

- 1: NIH3T3: FGFR2 with mutation as Patient 1
- 2: NIH3T3: FGFR2 with mutation as Patient 1 + BGJ398 (Infigratinib)
- 3: NIH3T3: FGFR2 with mutation as Patient 2
- 4: NIH3T3: FGFR2 with mutation as Patient 2 + BGJ398 (Infigratinib)
- 5: NIH3T3: FGFR2 with mutation as Patient 3
- 6: NIH3T3: FGFR2 with mutation as Patient 3 + BGJ398 (Infigratinib)
- 7: NIH3T3: FGFR2 with mutation as Patient 4
- 8: NIH3T3: FGFR2 with mutation as Patient 4 + BGJ398 (Infigratinib)

1 2 3 4 5 6 7 8

250kD  
150kD  
100kD

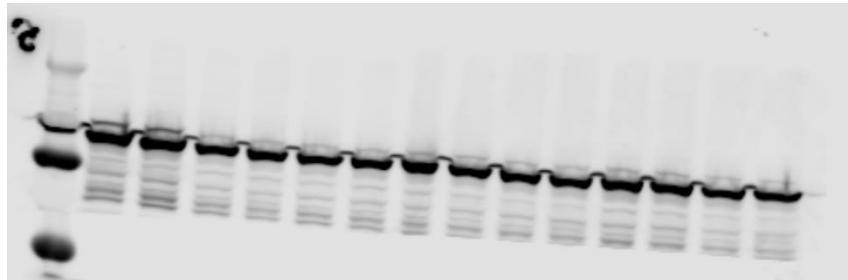

→ Vinculin 116kD  
Abcam (Catalog#V9131)
